# Supplementary material for: Prevalence of autoimmune thyroid disease in patients with psoriasis: a meta-analysis
Source: PubMed Central journal article supplement — BMJ Open. 2022 Jan 25;12(1):e055538. doi: 10.1136/bmjopen-2021-055538 (PMC8804708; doi:10.1136/bmjopen-2021-055538), 2022-01-25
Supplement: bmjopen-2021-055538.draft_revisions.pdf [file bmjopen-2021-055538.draft_revisions.pdf]

# BMJ Open

BMJ Open is committed to open peer review. As part of this commitment we make the peer review history of every article we publish publicly available.

When an article is published we post the peer reviewers' comments and the authors' responses online. We also post the versions of the paper that were used during peer review. These are the versions that the peer review comments apply to.

The versions of the paper that follow are the versions that were submitted during the peer review process. They are not the versions of record or the final published versions. They should not be cited or distributed as the published version of this manuscript.

BMJ Open is an open access journal and the full, final, typeset and author-corrected version of record of the manuscript is available on our site with no access controls, subscription charges or pay-per-view fees (<http://bmjopen.bmj.com>).

If you have any questions on BMJ Open's open peer review process please email [info.bmjopen@bmj.com](mailto:info.bmjopen@bmj.com)

# BMJ Open

## The prevalence of autoimmune thyroid disease in patients with psoriasis: a meta-analysis

|                               |                                                                                                                                                                                                                                                                                                                                                                                                                                                                                                                                                                                                                                                                                                                                                                                                |
|-------------------------------|------------------------------------------------------------------------------------------------------------------------------------------------------------------------------------------------------------------------------------------------------------------------------------------------------------------------------------------------------------------------------------------------------------------------------------------------------------------------------------------------------------------------------------------------------------------------------------------------------------------------------------------------------------------------------------------------------------------------------------------------------------------------------------------------|
| Journal:                      | <i>BMJ Open</i>                                                                                                                                                                                                                                                                                                                                                                                                                                                                                                                                                                                                                                                                                                                                                                                |
| Manuscript ID                 | bmjopen-2021-055538                                                                                                                                                                                                                                                                                                                                                                                                                                                                                                                                                                                                                                                                                                                                                                            |
| Article Type:                 | Original research                                                                                                                                                                                                                                                                                                                                                                                                                                                                                                                                                                                                                                                                                                                                                                              |
| Date Submitted by the Author: | 16-Jul-2021                                                                                                                                                                                                                                                                                                                                                                                                                                                                                                                                                                                                                                                                                                                                                                                    |
| Complete List of Authors:     | Zhang, Xiaochao; The Second Xiangya Hospital, Central South University, Dermatology; Hunan Key Laboratory of Medical Epigenomics<br>Zhang, Suhan; The Second Xiangya Hospital, Central South University, Dermatology; Hunan Key Laboratory of Medical Epigenomics<br>Wu, Ruifang; The Second Xiangya Hospital, Central South University, Dermatology; Hunan Key Laboratory of Medical Epigenomics<br>Zhang, Peng; The Second Xiangya Hospital, Central South University, Dermatology; Hunan Key Laboratory of Medical Epigenomics<br>Su, Yuwen; The Second Xiangya Hospital, Central South University, Dermatology; Hunan Key Laboratory of Medical Epigenomics<br>Li, Siying; The Second Xiangya Hospital, Central South University, Dermatology; Hunan Key Laboratory of Medical Epigenomics |
| Keywords:                     | Psoriasis < DERMATOLOGY, Thyroid disease < DIABETES & ENDOCRINOLOGY, IMMUNOLOGY                                                                                                                                                                                                                                                                                                                                                                                                                                                                                                                                                                                                                                                                                                                |
|                               |                                                                                                                                                                                                                                                                                                                                                                                                                                                                                                                                                                                                                                                                                                                                                                                                |

SCHOLARONE™  
Manuscripts

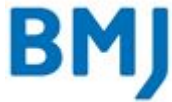

I, the Submitting Author has the right to grant and does grant on behalf of all authors of the Work (as defined in the below author licence), an exclusive licence and/or a non-exclusive licence for contributions from authors who are: i) UK Crown employees; ii) where BMJ has agreed a CC-BY licence shall apply, and/or iii) in accordance with the terms applicable for US Federal Government officers or employees acting as part of their official duties; on a worldwide, perpetual, irrevocable, royalty-free basis to BMJ Publishing Group Ltd ("BMJ") its licensees and where the relevant Journal is co-owned by BMJ to the co-owners of the Journal, to publish the Work in this journal and any other BMJ products and to exploit all rights, as set out in our [licence](#).

The Submitting Author accepts and understands that any supply made under these terms is made by BMJ to the Submitting Author unless you are acting as an employee on behalf of your employer or a postgraduate student of an affiliated institution which is paying any applicable article publishing charge ("APC") for Open Access articles. Where the Submitting Author wishes to make the Work available on an Open Access basis (and intends to pay the relevant APC), the terms of reuse of such Open Access shall be governed by a Creative Commons licence – details of these licences and which [Creative Commons](#) licence will apply to this Work are set out in our licence referred to above.

Other than as permitted in any relevant BMJ Author's Self Archiving Policies, I confirm this Work has not been accepted for publication elsewhere, is not being considered for publication elsewhere and does not duplicate material already published. I confirm all authors consent to publication of this Work and authorise the granting of this licence.

1  
2  
3  
4  
5 The prevalence of autoimmune thyroid disease in patients with psoriasis: a meta-analysis  
6  
7  
8  
9

10 Xiaochao Zhang<sup>1,2#</sup>, Suhan Zhang<sup>1,2#</sup>, Ruifang Wu<sup>1,2</sup>, Peng Zhang<sup>1,2</sup>, Yuwen Su<sup>1,2</sup>, Siying  
11  
12 Li<sup>1,2</sup>  
13  
14  
15  
16

- 17 1. Department of Dermatology, The Second Xiangya Hospital, Central South University  
18  
19 2. Hunan Key Laboratory of Medical Epigenomics, Changsha, Hunan, 410011, China  
20  
21

22 # Both two authors contributed equally to this work.  
23  
24  
25

26 Correspondence to: Yuwen Su, Department of Dermatology, The Second Xiangya  
27  
28 Hospital, Central South University, 139<sup>th</sup> Renmin Middle Road, Furong district,  
29  
30 Changsha, Hunan, 410011, China  
31  
32

33 Phone: 086-13755116633 Email: [suyuwen1963@csu.edu.cn](mailto:suyuwen1963@csu.edu.cn)  
34  
35

36 Siying Li, Department of Dermatology, The Second Xiangya Hospital, Central South  
37  
38 University, 139<sup>th</sup> Renmin Middle Road, Furong district, Changsha, Hunan, 410011,  
39  
40 China  
41  
42

43 Phone: 086-18975625824 Email: [2204130711@csu.edu.cn](mailto:2204130711@csu.edu.cn)  
44  
45  
46

47 Running title: A meta-analysis of AITD and psoriasis  
48  
49  
50

## 51 Abstract

52  
53

54 **Objective** Psoriasis is a chronic inflammatory disease with autoimmune etiology. A  
55  
56 possible link between psoriasis and autoimmune thyroid disease (AITD) has been  
57  
58 suggested in some studies with inconsistent findings. This meta-analysis aims to  
59  
60

1  
2  
3  
4  
5 determine the association between psoriasis and AITD and to provide better advice for  
6  
7 the management of psoriasis.  
8  
9

10 **Methods** The electronic search was conducted through PubMed, EMBASE,  
11 PubMed, EMBASE, and the Cochrane Library. Two independent reviewers screened the  
12 articles, and then the third independent reviewer conducted the final review. The Mantel-  
13 Haenszel method was applied to perform the meta-analysis using the Stata 15.0 software.  
14  
15 Odds ratio (OR) and 95% confidence intervals (CI) were pooled to compare the  
16 prevalence of AITD in psoriasis and control groups.  
17  
18  
19  
20  
21  
22

23 **Results** Ten available studies with data on 253,173 patients with psoriasis and  
24 1,376,073 controls were included. Meta-analysis showed that patients with psoriasis had  
25 a higher prevalence of AITD (OR = 1.46, 95% CI: 1.28 - 1.67, Z = 5.51,  $p < 0.001$ ),  
26 especially loss-of-function disorder of the thyroid gland. Both TgAb positive rate (OR =  
27 1.76, 95% CI: 1.28 - 2.43, Z = 3.47,  $p = 0.001$ ) and TPOAb positive rate (OR = 1.77, 95%  
28 CI: 1.31 - 2.40, Z = 3.68,  $p < 0.001$ ) were also increased in the psoriasis group compared  
29 to the control group.  
30  
31  
32  
33  
34  
35  
36  
37  
38  
39

40 **Conclusions** Our study indicated that the comorbid prevalence of AITD was  
41 significantly increased in patients with psoriasis. Thyroid-related examinations should be  
42 considered as a part of routine evaluations in patients with psoriasis.  
43  
44  
45  
46

47 PROSPERO registration number CRD42020206005

48  
49 Keywords: Psoriasis, Thyroid, Immunology  
50  
51  
52  
53

#### 54 **Strengths and limitations of this study**

55  
56 This is the first meta-analysis focusing on the risk of AITD for psoriasis patients, which  
57 included hypothyroidism, hyperthyroidism, subclinical hypothyroidism, subclinical  
58  
59  
60

1  
2  
3  
4  
5 hyperthyroidism, Hashimoto's thyroiditis, Graves' disease, TgAb and TPOAb.  
6

7  
8 All studies included had moderate to high quality and representative, and published in  
9  
10 recent years.  
11

12 The heterogeneity in the pooled data cannot be ignored, and couldn't improve by  
13  
14 subgroup analysis.  
15  
16  
17  
18  
19  
20  
21  
22  
23  
24  
25  
26  
27  
28  
29  
30  
31  
32  
33  
34  
35  
36  
37  
38  
39  
40  
41  
42  
43  
44  
45  
46  
47  
48  
49  
50  
51  
52  
53  
54  
55  
56  
57  
58  
59  
60

For peer review only

## INTRODUCTION

Psoriasis is a chronic inflammatory disease with autoimmune etiology, affecting approximately 125 million people around the world<sup>1 2</sup>. The skin lesions of psoriasis occur mainly on the scalp, trunk, and exterior surfaces of the limbs, and manifest as erythema, plaques, and scales<sup>3</sup>. Apart from the impaired appearance and intense pruritus of the skin lesions, various comorbidities have a significant impact on the quality of life in patients with psoriasis<sup>4 5</sup>. Among the comorbidities, autoimmune thyroid disease (AITD) has been characterized in patients with psoriasis. For patients with psoriasis who also develop complications, their management requires extra attention<sup>6</sup>. Therefore, understanding the risk of other diseases on psoriasis has important clinical significance.

Autoimmune thyroid disease (AITD) is an inflammatory disease of the thyroid gland with the presence of thyroid autoantibodies, lymphocytic infiltration of thyroid parenchyma, and even thyroid dysfunction<sup>7</sup>. Graves' disease (GD) and Hashimoto's thyroiditis (HT) are the two main clinical subtypes of AITD. GD is characterized by hyperthyroidism and the presence of thyroid-stimulating hormone receptor antibodies (TRAb) in serum, while HT is characterized by hypothyroidism and the presence of thyroid peroxidase antibodies (TPOAb) or Thyroglobulin antibodies (TgAb) in serum<sup>8</sup>.

Psoriasis and AITD share some common pathophysiological features, such as Th1-predominant adaptive immune reaction<sup>7</sup>. Hence, the relationship between AITD and psoriasis has been hypothesized and studied. In 2006, Antonelli *et al.* first reported that the prevalence of AITD in patients with psoriatic arthritis was significantly higher than in the general population<sup>9</sup>. However, the study reported by Tsai *et al.* pointed that the

1  
2  
3  
4 association between psoriasis and AITD was limited<sup>10</sup>. In recent years, several  
5  
6 observational studies regarding the association between psoriasis and AITD were  
7  
8 published in succession, but the results of the studies were inconsistent<sup>11-16</sup>. In addition,  
9  
10 Karadag *et al.* reported that the commonly administered acitretin treatment for psoriasis  
11  
12 system treatment affects the levels of free T4 (thyroid hormone)<sup>17</sup>. To address this  
13  
14 discrepancy, we designed and performed a meta-analysis with the existing evidence to  
15  
16 assess the relationship between psoriasis and AITD, and to provide guidance on clinical  
17  
18 management of psoriasis.  
19  
20  
21  
22  
23

## 24 **METHODS**

### 25 **Search strategy**

26  
27  
28  
29  
30 The literature search was conducted through PubMed, EMBASE, and the  
31  
32 Cochrane Library for relevant studies published before August 24th, 2020. Detailed  
33  
34 literature-search strategies of the databases are presented in Table 1.  
35  
36

### 37 **Inclusion and exclusion criteria**

38  
39  
40 The inclusion criteria for the studies included in our analysis were the following:  
41  
42 (1) The prevalence of AITD in patients with psoriasis/psoriatic arthritis and non-  
43  
44 psoriasis were studied; (2) The study was a cohort study, case-control study, or cross-  
45  
46 sectional study; (3) The observed indicators were at least one of the following outcomes:  
47  
48 the prevalence of hypothyroidism, hyperthyroidism, HT, GD, or the positive rate of  
49  
50 TPOAb, TgAb, or TRAb; (4) The number of patients with psoriasis and the control  
51  
52 group should be over 50. Drug-related studies, animal studies, reviews, and conference  
53  
54 abstracts were excluded from our analysis.  
55  
56  
57  
58  
59  
60



## Data extraction

The specific process for analyzing the studies generated from the search was as follows: record screening and data extraction were performed by two independent authors (XC Zhang and SH Zhang) according to the above retrieval strategy. The following information in the included studies were extracted: the name of the first author, year of publication, country of origin, study design, sample size, the definition of psoriasis and AITD, gender ratio, and mean age.

## Quality assessment

The Newcastle-Ottawa Scale (NOS)<sup>18</sup> was used to assess the quality of the included cohort and case-control studies, and the tools recommended by the Agency for Healthcare Research and Quality (AHRQ)<sup>19</sup> were used for the cross-sectional studies.

## Data synthesis and analysis

The meta-analysis was performed using the Stata 15.0 software. We used the Odds ratio (OR) and 95% Confidence Intervals (CI) to describe the differences between groups. The statistical difference was considered significant when  $p < 0.05$ . The Mantel-Haenszel method was used for data analysis. The inconsistency index ( $I^2$ ) was used to evaluate heterogeneity as follows:  $I^2 \leq 25\%$ , no heterogeneity;  $25\% \leq I^2 \leq 50\%$ , mild heterogeneity;  $50\% < I^2 \leq 75\%$ , moderate heterogeneity;  $I^2 > 75\%$ , severe heterogeneity. A fixed effects model was applied if  $I^2 \leq 50\%$  and the random effects model was applied when  $I^2 > 50\%$ . Publication bias was assessed by Funnel chart and Egger's test (Publication bias was considered when  $p < 0.05$ ). Sensitivity Analysis was performed to assess the stability of the meta-analysis by omitting one study in each turn. The flow

1  
2  
3  
4 chart was drawn in Adobe Illustrator, and the forest charts, funnel charts, and Egger's  
5  
6 test charts were drawn by Stata 15.0 software.  
7

### 8 9 **Patient and public involvement**

10  
11 There were not patients or the public involved in this review.  
12  
13

## 14 **RESULTS**

### 15 16 17 **Search results**

18  
19 After removing duplicate results, we identified 3217 published studies in the initial  
20  
21 search. After screening the titles and abstracts, 16 studies underwent further screening.  
22  
23 After full-text screening, 10 studies<sup>2 9-16 20</sup> that met the inclusion criteria were included  
24  
25 in the final analysis (figure. 1).  
26  
27  
28  
29

### 30 **Study characteristics**

31  
32 The basic characteristics of the included studies are shown in Tables 2 and 3. A  
33  
34 total of 253,173 patients with psoriasis and 1,376,073 control patients were included in  
35  
36 the analysis. Four studies were from Asia, and six were from Europe and North America.  
37  
38 Two of the studies were cohort studies, seven were case-controlled studies, and one was  
39  
40 a cross-sectional study.  
41  
42  
43  
44

### 45 **Prevalence of AITD in patients with psoriasis**

46  
47 Ten studies provided available data on the prevalence of AITD in patients with  
48  
49 psoriasis. The meta-analysis showed that patients with psoriasis had a higher prevalence  
50  
51 of AITD than the controls (OR = 1.46, 95% CI: 1.28 - 1.67, Z = 5.51,  $p < 0.001$ ), and  
52  
53 the heterogeneity was moderate ( $I^2 = 70.6%$ ,  $p < 0.001$ ). Subgroup analyses by study  
54  
55 type indicated that the prevalence of AITD was significantly higher in the case-control  
56  
57  
58  
59  
60

1  
2  
3  
4 study strata (OR = 1.40, 95% CI: 1.18 - 1.67,  $Z = 3.88$ ,  $p < 0.001$ ) and the cross-section  
5  
6 study strata (OR = 2.11, 95% CI: 1.55-2.88,  $Z = 4.72$ ,  $p < 0.001$ ), but not in the cohort  
7  
8 study strata (OR = 1.55, 95% CI: 0.95 - 2.54,  $Z = 1.76$ ,  $p = 0.079$ ) (figure. 2).

### 11 **Sensitivity analysis and publication bias**

12  
13  
14 The combined effects after removal of any one study were all within the  
15  
16 confidence interval of the total combined effect (figure. 3A). Therefore, the results of  
17  
18 the analysis were reliable and stable. The funnel chart for the publication bias is shown  
19  
20 in Figure. 3B. The results of Egger's test suggested no significant publication bias was  
21  
22 evident ( $p = 0.066$ , figure. 3C).

### 27 **Psoriasis and thyroid function status**

28  
29  
30 Patients with psoriasis had a significantly higher prevalence of hypothyroidism  
31  
32 than the controls (OR = 1.44, 95% CI: 1.34 - 1.55,  $Z = 9.44$ ,  $p < 0.001$ ) and no significant  
33  
34 heterogeneity was observed ( $I^2 = 0.0\%$ ,  $p = 0.679$ ). Patients with psoriasis had a higher  
35  
36 prevalence of hyperthyroidism than the controls (OR = 1.20, 95% CI: 1.11 - 1.30,  $Z =$   
37  
38  $4.76$ ,  $p < 0.001$ ). No significant heterogeneity was observed ( $I^2 = 0.0\%$ ,  $p = 0.512$ , figure.  
39  
40 4A-B).

41  
42  
43 Additionally, a higher prevalence of subclinical hypothyroidism and subclinical  
44  
45 hyperthyroidism was observed in patients with psoriasis compared with the controls  
46  
47 (Subclinical hypothyroidism: OR = 2.17, 95% CI: 0.27 - 17.72,  $Z = 0.72$ ,  $p = 0.470$ .  
48  
49 Subclinical hyperthyroidism: OR = 2.66, 95% CI: 0.74 - 9.56,  $Z = 1.50$ ,  $p = 0.132$ ).  
50  
51 However, the difference was not statistically significant (Supplementary figure. 1 A-  
52  
53  
54  
55  
56  
57  
58  
59  
60 B).

## Psoriasis and specific autoimmune thyroid diseases

The prevalence of HT in patients with psoriasis and in the controls was 0.209% and 0.199%, respectively, while the prevalence of GD in patients with psoriasis and in the controls was 0.443% and 0.405%, respectively. The prevalence of HT was significantly higher in patients with psoriasis than the controls (OR = 1.68, 95% CI: 1.48 - 1.92,  $Z = 7.86$ ,  $p < 0.001$ ) and the heterogeneity was mild ( $I^2 = 37.3\%$ ,  $p = 0.188$ ). However, the heterogeneity of GD in these studies was too severe ( $I^2 = 92.7\%$ ,  $p < 0.001$ ), so the OR (OR = 1.02, 95% CI: 0.65 - 1.60,  $Z = 0.07$ ,  $p = 0.943$ ) had no reference value (figure. 4C, figure. 5A).

## Psoriasis and thyroid serological antibodies

The positive rate of TgAb was significantly higher in patients with psoriasis than the controls (OR = 1.76, 95% CI: 1.28 - 2.43,  $Z = 3.47$ ,  $p = 0.001$ ) and no significant heterogeneity was observed ( $I^2 = 14.3\%$ ,  $p = 0.323$ ). The positive rate of TPOAb was significantly higher in patients with psoriasis than the controls (OR = 1.77, 95% CI: 1.31 - 2.40,  $Z = 3.68$ ,  $p < 0.001$ ) and the heterogeneity was mild ( $I^2 = 45.0\%$ ,  $p = 0.122$ ). Since no studies have been published about the positive rate of TRAb in patients with psoriasis, only TgAb and TPOAb were analyzed (figure. 5B-C).

## Heterogeneity analysis

According to the results of the funnel plot, three studies outside the funnel plot were removed and the meta-analysis was conducted again. The results of the second analysis also showed that patients with psoriasis had a higher prevalence of AITD than the controls (OR = 1.30, CI: 1.18-1.43,  $Z = 5.46$ ,  $p < 0.001$ ) and the heterogeneity was

1  
2  
3  
4 mild ( $I^2 = 46.8\%$ ,  $p = 0.080$ ) The source of heterogeneity in the study of Antonelli *et*  
5  
6 *al.* was that all the patients were patients with psoriatic arthritis, and the prevalence of  
7  
8 AITD in patients with psoriatic arthritis may be higher than that of patients with  
9  
10 psoriasis<sup>21</sup>. The source of heterogeneity in the study by Peluso *et al.* may have been due  
11  
12 to the control group bring comprised of hospital staff rather than the general population<sup>2</sup>.  
13  
14 The source of heterogeneity in the study of Kiguradze *et al.* may lie in the fact that it  
15  
16 was a cross-sectional study<sup>13</sup>. These three studies were not excluded because they had  
17  
18 little effect on the final results of the analysis.  
19  
20  
21  
22  
23

## 24 **DISCUSSION**

25  
26  
27 To our knowledge, this is the first meta-analysis focusing on the risk of AITD for  
28  
29 psoriasis patients. While the study by Khan SR *et al.* is the first meta-analysis of studies  
30  
31 on the association between AITD and the risk of psoriasis incidence<sup>22</sup>. We summarized  
32  
33 all available evidence on the association between psoriasis and AITD. Our meta-  
34  
35 analysis found that the prevalence of AITD, and particularly HT, was higher in patients  
36  
37 with psoriasis than the control individuals. Additionally, elevated positive rates of  
38  
39 TgAb and TPOAb were also observed in patients with psoriasis. Collectively, a positive  
40  
41 association between psoriatic disease and AITD can be indicated. Considering that  
42  
43 psoriasis is a type of discosmetic dermatosis that is easy to be concerned about, patients  
44  
45 with psoriasis are more likely to be active about seeing a doctor regarding their  
46  
47 condition than patients with AITD. As such, we recommend that patients with psoriasis  
48  
49 receive a thyroid-related examination at their first visit, as well at regular follow-ups to  
50  
51 assess thyroid function. By promoting early diagnosis and treatment of AITD, patients  
52  
53  
54  
55  
56  
57  
58  
59  
60

1  
2  
3  
4 may be able to avoid thyroid dysfunction.  
5

### 6 7 **Main findings**

8  
9 The primary finding of this meta-analysis is the increased prevalence of AITD in  
10 the population of patients with psoriasis. However, moderate heterogeneity was  
11 observed. We hypothesize that the inconsistency of the study designs was the major  
12 source of heterogeneity. When the subgroup analysis according to different study  
13 designs was conducted, the heterogeneity in each subgroup was reduced, and the results  
14 remained positive. According to the definition of the study designs, an accurate cause-  
15 effect relationship can only be demonstrated in the cohort studies. In the present study,  
16 three types of study designs were included in the meta-analysis, including cohort, case  
17 controlled, and cross-sectional studies. Therefore, the results should be interpreted with  
18 caution. Additionally, it has been demonstrated that the prevalence of HT in patients  
19 with psoriasis is elevated compared with the controls. HT, a main clinical subtype of  
20 AITD, is generally accompanied by hypothyroidism. An elevated frequency of  
21 hypothyroidism was also observed in patients with psoriasis. Taken together, the  
22 current data indicates that psoriasis may be closely associated with the loss-of-function  
23 disorder of the thyroid gland.  
24  
25  
26  
27  
28  
29  
30  
31  
32  
33  
34  
35  
36  
37  
38  
39  
40  
41  
42  
43  
44  
45  
46  
47

### 48 **Common pathogenesis of psoriasis and AITD**

49  
50 Abnormal immunological reaction and underlying genetic risk are two  
51 indispensable factors responsible for triggering psoriasis and AITD. These two diseases  
52 share some autoimmune processes and susceptibility genes, which may explain the  
53 concurrence of psoriasis and AITD. The predominant Th1 immune reaction has been  
54  
55  
56  
57  
58  
59  
60

1  
2  
3  
4 observed in patients with psoriasis<sup>23 24</sup>, such as Th1 infiltration in involved tissues, and  
5  
6 high serum levels of Th1-prototype chemokines and cytokines (TNF- $\alpha$ , IFN- $\gamma$ , and  
7  
8 CXCL10), all of which are present in AITD<sup>25-27</sup>. Additionally, Th17-mediated immune  
9  
10 disorder has also been observed in psoriasis and AITD<sup>28 29</sup>. Several predisposing genetic  
11  
12 alleles or regions are shared by the two diseases. For example, the genetic data from  
13  
14 265 families with two or more autoimmune disorders have shown that the PTPN22-  
15  
16 R620W allele has a remarkable association with HT and a mild association with  
17  
18 psoriasis<sup>30 31</sup>. Additionally, other SNP variations in the PTPN22 gene have been  
19  
20 demonstrated to be indicators for evaluating the risk of psoriasis<sup>32</sup>. IL12B has been  
21  
22 generally recognized as a psoriasis susceptibility gene<sup>33</sup>, an upstream variation of which  
23  
24 was found to affect the phenotype of AITD in men<sup>34</sup>.

### 31 32 **Implications for practice**

33  
34  
35 It has been reported that the administration of acitretin, a common drug for the  
36  
37 treatment of psoriasis, can lead to the reduction of free T4 (thyroid hormone) levels in  
38  
39 patients with psoriasis<sup>17</sup>. The finding suggests that patients with psoriasis should have  
40  
41 thyroid-related examinations regularly while undergoing acitretin treatment. In addition,  
42  
43 propylthiouracil (PTU), a drug used to inhibit thyroid hormone synthesis, has been  
44  
45 found to be effective in the treatment of psoriasis<sup>35</sup>. Based on the above findings, it is  
46  
47 recommended that the treatment options be adjusted once patients with psoriasis are  
48  
49 diagnosed with comorbid AITD.  
50  
51  
52  
53  
54

### 55 56 **Limitations**

57  
58 This meta-analysis contains several limitations. First, the meta-analysis included  
59  
60

1  
2  
3  
4 studies with different study designs. Given this, we conducted a subgroup analysis of  
5  
6 each study design. However, the heterogeneity did not improve, suggesting that  
7  
8 different study designs were not the main source of heterogeneity. Second, the  
9  
10 diagnostic criteria of psoriasis and AITD, gender ratio, and course of disease varied  
11  
12 from study to study, but meta-analysis regression was meaningless due to the small  
13  
14 number of articles included in our study. Additionally, the included studies were  
15  
16 conducted in different regions, so the influence of geographical location, living habits,  
17  
18 and drug use may also affect the prevalence of AITD in the population, resulting in  
19  
20 discordance. Therefore, further large-scale and high-quality prospective studies are still  
21  
22 required to validate our findings.  
23  
24  
25  
26  
27  
28

## 29 30 **CONCLUSIONS**

31  
32 The present meta-analysis revealed that AITD was more prevalent in patients with  
33  
34 psoriasis than in the general population, especially loss-of-function disorder of the  
35  
36 thyroid gland. Moreover, patients with psoriasis were found to have elevated positive  
37  
38 rates of TPOAb and TgAb compared to the control individuals. Accordingly, we  
39  
40 recommend that every dermatologist be conscious of this association and suggest those  
41  
42 thyroid-related examinations, such as thyroid function test and analysis of thyroid  
43  
44 antibodies, be included in the routine tests for patients with psoriasis.  
45  
46  
47  
48  
49  
50

51  
52  
53 **Contributors** XZ and SZ carried out the extraction of reference data, meta-analysis,  
54  
55 and wrote manuscripts, RW and PZ supported and assisted the manuscripts, YS and SL  
56  
57 reviewed and suggested the manuscripts. All authors were involved in finalizing the  
58  
59  
60



1  
2  
3  
4 manuscript.

5  
6 **Funding**

7  
8  
9 This work was supported by grants from the National Natural Science Foundation of  
10  
11 China [No. 81872534 to Yuwen Su].

12  
13  
14 **Competing interests** None declared.

15  
16  
17 **Patient consent for publication** Not required.

18  
19 **Ethics approval** As this is a meta-analysis ethics approval was not required.

20  
21  
22 **Provenance and peer review** Not commissioned; externally peer reviewed.

23  
24  
25 **Data availability statement** Data are available in a public, open access repository.

26  
27  
28 No additional data are available.

29  
30 **Acknowledgments**

31  
32 The authors thank AiMi Academic Services ([www.aimieditor.com](http://www.aimieditor.com)) for English  
33  
34 language editing and review services.

35  
36  
37 **ORCID iD**

38  
39  
40 Yuwen Su <https://orcid.org/0000-0001-9918-1830>  
41  
42  
43  
44  
45  
46  
47  
48  
49  
50  
51  
52  
53  
54  
55  
56  
57  
58  
59  
60

## References

1. Griffiths CEM, Van Der Walt JM, Ashcroft DM, *et al.* The global state of psoriasis disease epidemiology: a workshop report. *Br J Dermatol* 2017;177(1):e4-e7.
2. Peluso R, Lupoli GA, Del Puente A, *et al.* Prevalence of thyroid autoimmunity in patients with spondyloarthropathies. *J Rheumatol* 2011;38(7):1371-7.
3. Langley RG, Krueger GG, Griffiths CE. Psoriasis: epidemiology, clinical features, and quality of life. *Ann Rheum Dis* 2005;64 Suppl 2:ii18-23; discussion ii24-5.
4. Dauden E, Castaneda S, Suarez C, *et al.* Clinical practice guideline for an integrated approach to comorbidity in patients with psoriasis. *J Eur Acad Dermatol Venereol* 2013;27(11):1387-404.
5. Schaefer CP, Cappelleri JC, Cheng R, *et al.* Health care resource use, productivity, and costs among patients with moderate to severe plaque psoriasis in the United States. *J Am Acad Dermatol* 2015;73(4):585-93.e3.
6. Kaushik SB, Lebwohl MG. Psoriasis: Which therapy for which patient: Psoriasis comorbidities and preferred systemic agents. *J Am Acad Dermatol* 2019;80(1):27-40.
7. Antonelli A, Ferrari SM, Corrado A, *et al.* Autoimmune thyroid disorders. *Autoimmun Rev* 2015;14(2):174-80.
8. Hesarghatta Shyamasunder A, Abraham P. Measuring TSH receptor antibody to influence treatment choices in Graves' disease. *Clin Endocrinol (Oxf)* 2017;86(5):652-57.
9. Antonelli A, Delle Sedie A, Fallahi P, *et al.* High prevalence of thyroid autoimmunity and hypothyroidism in patients with psoriatic arthritis. *J Rheumatol* 2006;33(10):2026-8.
10. Tsai TF, Wang TS, Hung ST, *et al.* Epidemiology and comorbidities of psoriasis patients in a national database in Taiwan. *J Dermatol Sci* 2011;63(1):40-6.
11. Fallahi P, Ferrari SM, Ruffilli I, *et al.* Increased incidence of autoimmune thyroid disorders in patients with psoriatic arthritis: a longitudinal follow-up study. *Immunol Res* 2017;65(3):681-86.
12. Haddad A, Ashkenazi RI, Bitterman H, *et al.* Endocrine Comorbidities in Patients with Psoriatic Arthritis: A Population-based Case-controlled Study. *J Rheumatol* 2017;44(6):786-90.
13. Kiguradze T, Bruins FM, Guido N, *et al.* Evidence for the association of Hashimoto's thyroiditis with psoriasis: a cross-sectional retrospective study. *Int J Dermatol* 2017;56(5):553-56.
14. Vassilatou E, Papadavid E, Papastamatakis P, *et al.* No association of psoriasis with autoimmune thyroiditis. *J Eur Acad Dermatol Venereol* 2017;31(1):102-06.
15. Alidrisi HA, Al Hamdi K, Mansour AA. Is There Any Association Between Psoriasis and Hashimoto's Thyroiditis? *Cureus* 2019;11(3):e4269.
16. Wang SH, Wang J, Lin YS, *et al.* Increased risk for incident thyroid diseases in people with psoriatic disease: A cohort study. *J Am Acad Dermatol* 2019;80(4):1006-12.
17. Karadag AS, Ozlu E, Kostek O, *et al.* Effect of low-dose acitretin treatment on pituitary hormones in psoriasis vulgaris: A retrospective study. *Indian J Dermatol Venereol Leprol* 2019;85(3):300-04.
18. The Newcastle-Ottawa Scale (NOS) for assessing the quality of nonrandomised studies in Newcastle-analyses. Secondary The Newcastle-Ottawa Scale (NOS) for assessing the quality of nonrandomised studies in Newcastle-analyses. 2019.
19. AHRQ Evidence Reports. Secondary AHRQ Evidence Reports 2004.
20. Wu JJ, Nguyen TU, Poon KY, *et al.* The association of psoriasis with autoimmune diseases. *J Am Acad Dermatol* 2012;67(5):924-30.
21. Vastarella M, Megna M, Lupoli GA, *et al.* Is there any association between psoriasis, psoriatic

- 1  
2  
3 arthritis and thyroid autoimmunity? *Australas J Dermatol* 2020.
- 4 22. Khan SR, Bano A, Wakkee M, *et al.* The association of autoimmune thyroid disease (AITD) with  
5 psoriatic disease: a prospective cohort study, systematic review and meta-analysis. *Eur J Endocrinol*  
6 2017;177(4):347-59.
- 7 23. Cai Y, Fleming C, Yan J. New insights of T cells in the pathogenesis of psoriasis. *Cell Mol Immunol*  
8 2012;9(4):302-9.
- 9 24. Lowes MA, Suarez-Farinas M, Krueger JG. Immunology of psoriasis. *Annu Rev Immunol* 2014;32:227-  
10 55.
- 11 25. Antonelli A, Ferrari SM, Giuggioli D, *et al.* Chemokine (C-X-C motif) ligand (CXCL)10 in autoimmune  
12 diseases. *Autoimmun Rev* 2014;13(3):272-80.
- 13 26. Nanba T, Watanabe M, Inoue N, *et al.* Increases of the Th1/Th2 cell ratio in severe Hashimoto's  
14 disease and in the proportion of Th17 cells in intractable Graves' disease. *Thyroid* 2009;19(5):495-  
15 501.
- 16 27. Peng S, Li C, Wang X, *et al.* Increased Toll-Like Receptors Activity and TLR Ligands in Patients with  
17 Autoimmune Thyroid Diseases. *Front Immunol* 2016;7:578.
- 18 28. Hansel A, Gunther C, Ingwersen J, *et al.* Human slan (6-sulfo LacNAc) dendritic cells are inflammatory  
19 dermal dendritic cells in psoriasis and drive strong TH17/TH1 T-cell responses. *J Allergy Clin Immunol*  
20 2011;127(3):787-94.e1-9.
- 21 29. Vitales-Noyola M, Ramos-Levi AM, Martinez-Hernandez R, *et al.* Pathogenic Th17 and Th22 cells are  
22 increased in patients with autoimmune thyroid disorders. *Endocrine* 2017;57(3):409-17.
- 23 30. Criswell LA, Pfeiffer KA, Lum RF, *et al.* Analysis of families in the multiple autoimmune disease  
24 genetics consortium (MADGC) collection: the PTPN22 620W allele associates with multiple  
25 autoimmune phenotypes. *Am J Hum Genet* 2005;76(4):561-71.
- 26 31. Wang H, Wang Z, Rani PL, *et al.* Identification of PTPN22, ST6GAL1 and JAZF1 as psoriasis risk genes  
27 demonstrates shared pathogenesis between psoriasis and diabetes. *Exp Dermatol*  
28 2017;26(11):1112-17.
- 29 32. Li Y, Liao W, Chang M, *et al.* Further genetic evidence for three psoriasis-risk genes: ADAM33,  
30 CDKAL1, and PTPN22. *J Invest Dermatol* 2009;129(3):629-34.
- 31 33. Cargill M, Schrodi SJ, Chang M, *et al.* A large-scale genetic association study confirms IL12B and leads  
32 to the identification of IL23R as psoriasis-risk genes. *Am J Hum Genet* 2007;80(2):273-90.
- 33 34. Walsh JP, Berry J, Liu S, *et al.* The clinical presentation of autoimmune thyroid disease in men is  
34 associated with IL12B genotype. *Clin Endocrinol (Oxf)* 2011;74(4):508-12.
- 35 35. Gnanaraj P, Malligarjunan H, Dayalan H, *et al.* Therapeutic efficacy and safety of propylthiouracil in  
36 psoriasis: an open-label study. *Indian J Dermatol Venereol Leprol* 2011;77(6):673-6.
- 37  
38  
39  
40  
41  
42  
43  
44  
45  
46  
47  
48  
49  
50  
51  
52

### 53 **Figure legend:**

54  
55  
56 Figure 1 Flowchart for study screening

57  
58 Figure 2 Forest plot of the association between psoriasis and autoimmune thyroid  
59  
60

disease

Figure 3 Sensitivity analysis and publication bias

Figure 4 A: Forest plots of psoriasis and hypothyroidism B: Forest plots of psoriasis and hyperthyroidism C: Forest plots of psoriasis and HT

Figure 5 A: Forest plots of psoriasis and GD B: Forest plots of psoriasis and TgAb C: Forest plots of psoriasis and TPOAb

| Database | Retrieval strategy                                                                                                                                                                                                                                                                                                                                                                                                                                                          |
|----------|-----------------------------------------------------------------------------------------------------------------------------------------------------------------------------------------------------------------------------------------------------------------------------------------------------------------------------------------------------------------------------------------------------------------------------------------------------------------------------|
| PubMed   | ((((((((((Thyroid[Title/Abstract]) OR (Thyroiditis[Title/Abstract])) OR (Hashimoto Thyroiditis[Title/Abstract])) OR (Graves Disease[Title/Abstract])) OR (Hyperthyroidism[Title/Abstract])) OR (Hypothyroidism[Title/Abstract])) OR (TgAb[Title/Abstract])) OR (TPOAb[Title/Abstract])) OR (TRAb[Title/Abstract])) OR (Endocrine Comorbidities[Title/Abstract])) OR (Autoimmune diseases[Title/Abstract])) AND ((psoriasis[Title/Abstract]) OR (psoriatic[Title/Abstract])) |
| Cochrane | ((Psoriasis) OR psoriatic) OR Pustulosis of Palms) AND (((((((Thyroid) OR Thyroiditis) OR Thyroiditides) OR Hashimoto Disease) OR Graves Disease) OR Hyperthyroidism) OR Hypothyroidism)). Then chose "Trials"                                                                                                                                                                                                                                                              |
| Embase   | (thyroid:ab,ti OR thyroiditis:ab,ti OR 'hashimoto thyroiditis':ab,ti OR 'graves disease':ab,ti OR hyperthyroidism:ab,ti OR hypothyroidism:ab,ti OR tgab:ab,ti OR tpoab:ab,ti OR trab:ab,ti OR 'endocrine comorbidities':ab,ti OR 'autoimmune diseases':ab,ti) AND (psoriasis:ab,ti OR psoriatic:ab,ti)                                                                                                                                                                      |

**Table 1** Database source and retrieval strategy.

TPOAb: Thyroid peroxidase antibody; TgAb: Thyroglobulin antibody; TRAb: Thyroid stimulating hormone receptor antibody.

| Study (Author)          | Year | Country | Study design | No.Patients | No.Controls | Patients, % male | Patients, mean age |
|-------------------------|------|---------|--------------|-------------|-------------|------------------|--------------------|
| Antonelli <i>et al.</i> | 2006 | Italy   | Case-control | 80          | 400         | 45               | 57                 |
| Tsai <i>et al.</i>      | 2011 | China   | Case-control | 51800       | 207200      | 61.6             | 46.4               |
| Peluso <i>et al.</i>    | 2011 | Italy   | Case-control | 108         | 318         | 47.2             | 39.9               |

|                          |      |          |           |         |        |       |       |  |
|--------------------------|------|----------|-----------|---------|--------|-------|-------|--|
| <i>al.</i>               |      |          |           | control |        |       |       |  |
| Wu <i>et al.</i>         | 2012 | American | Case-     | 25341   | 126705 | 51.6  | 48.9  |  |
|                          |      |          | control   |         |        |       |       |  |
| Vassilatou <i>et al.</i> | 2017 | Greece   | Case-     | 114     | 286    | 50.9  | 52.7  |  |
|                          |      |          | control   |         |        |       |       |  |
| Kiguradze <i>et al.</i>  | 2017 | Greece   | Cross-    | 9654    | 846961 | NA    | NA    |  |
|                          |      |          | sectional |         |        |       |       |  |
| Haddad <i>et al.</i>     | 2017 | Israel   | Case-     | 3161    | 31610  | 46.6  | 58.4  |  |
|                          |      |          | control   |         |        |       |       |  |
| Fallahi <i>et al.</i>    | 2017 | Italy    | Cohort    | 97      | 97     | 47.4  | 56    |  |
| Alidrisi <i>et al.</i>   | 2019 | Iraq     | Case-     | 56      | 54     | 41.1  | 43.05 |  |
|                          |      |          | control   |         |        |       |       |  |
| Wang <i>et al.</i>       | 2019 | China    | Cohort    | 162842  | 162842 | 59.35 | 45    |  |

**Table 2** Characteristics of the included studies

| Study (Author)           | Definition of psoriasis                                                             | Definition of AITD                                                                                      | NOS score |
|--------------------------|-------------------------------------------------------------------------------------|---------------------------------------------------------------------------------------------------------|-----------|
| Antonelli <i>et al.</i>  | PsA was diagnosed by the criteria of Vasey and Espinoza                             | AITD was diagnosed by serum levels of thyroid stimulating hormone and TgAb and TPOAb                    | 7         |
| Tsai <i>et al.</i>       | Ps was diagnosed by clinical examination                                            | AITD was diagnosed by clinical examination                                                              | 6         |
| Peluso <i>et al.</i>     | PsA was diagnosed by the Classification of Psoriatic Arthritis study group criteria | AITD was diagnosed by serum levels of TgAb > 115 IU/mL or TPOAb > 34 IU/mL, and Thyroid ultrasonography | 7         |
| Wu <i>et al.</i>         | Ps was diagnosed by clinical diagnosis                                              | AITD was diagnosed by clinical diagnosis                                                                | 7         |
| Vassilatou <i>et al.</i> | Ps was diagnosed by clinical examination                                            | AITD was diagnosed by serum levels of TgAb > 115 IU/mL or TPOAb > 34 IU/mL                              | 7         |
| Kiguradze <i>et al.</i>  | Ps was diagnosed by clinical diagnosis                                              | AITD was diagnosed by clinical diagnosis                                                                | 6         |
| Haddad <i>et al.</i>     | Ps was diagnosed by clinical diagnosis                                              | AITD was diagnosed by clinical diagnosis                                                                | 6         |
| Fallahi <i>et al.</i>    | PsA was diagnosed by the criteria of Vasey and Espinoza                             | AITD was diagnosed by serum levels of TgAb or TPOAb > 100 IU/mL                                         | 6         |
| Alidrisi <i>et al.</i>   | Ps was diagnosed by clinical                                                        | AITD was diagnosed by serum levels of                                                                   | 6         |

|   |                    |                                                                          |                                                                            |
|---|--------------------|--------------------------------------------------------------------------|----------------------------------------------------------------------------|
| 1 |                    |                                                                          |                                                                            |
| 2 |                    |                                                                          |                                                                            |
| 3 | <i>al.</i>         | diagnosis                                                                | TgAb > 115 IU/mL or TPOAb > 34 IU/mL                                       |
| 4 |                    |                                                                          |                                                                            |
| 5 | Wang <i>et al.</i> | Ps was diagnosed by at least 2 outpatient visits or 1 hospital admission | AITD was diagnosed by at least 2 outpatient visits or 1 hospital admission |
| 6 |                    |                                                                          | 8                                                                          |
| 7 |                    |                                                                          |                                                                            |
| 8 |                    |                                                                          |                                                                            |
| 9 |                    |                                                                          |                                                                            |

**Table 3** Characteristics of the included studies (2)

For peer review only

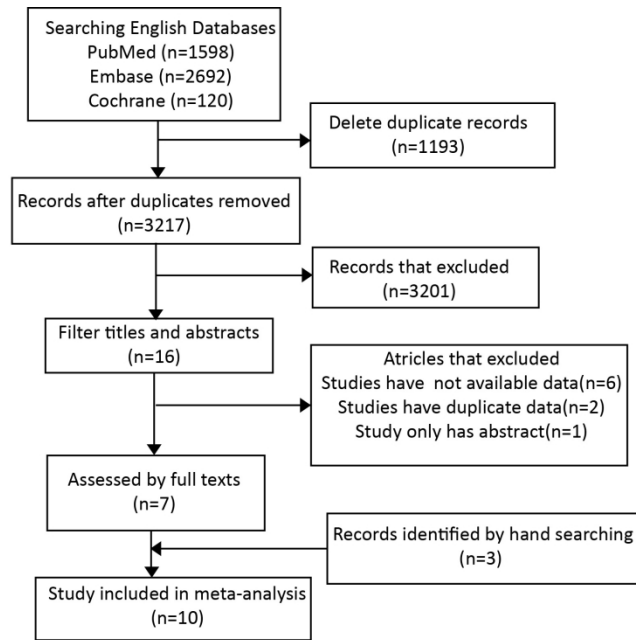

Flowchart for study screening

209x152mm (300 x 300 DPI)

1  
2  
3  
4  
5  
6  
7  
8  
9  
10  
11  
12  
13  
14  
15  
16  
17  
18  
19  
20  
21  
22  
23  
24  
25  
26  
27  
28  
29  
30  
31  
32  
33  
34  
35  
36  
37  
38  
39  
40  
41  
42  
43  
44  
45  
46  
47  
48  
49  
50  
51  
52  
53  
54  
55  
56  
57  
58  
59  
60

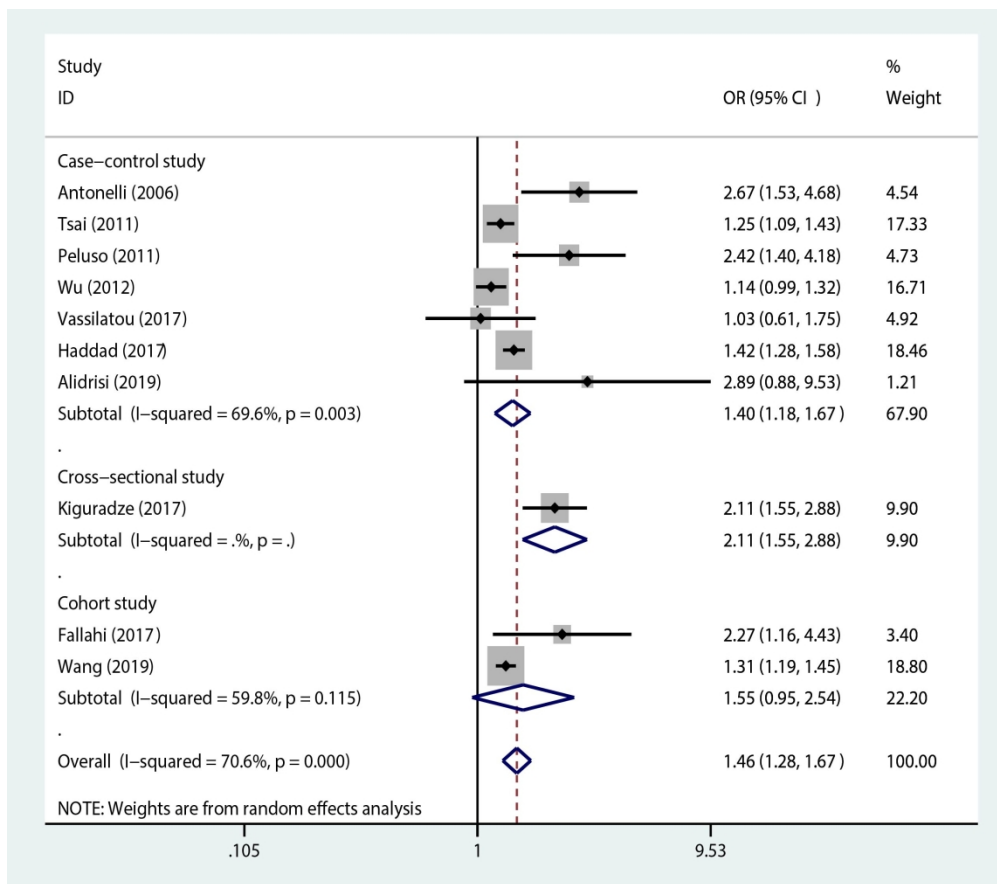

Forest plot of the association between psoriasis and autoimmune thyroid disease

215x189mm (300 x 300 DPI)



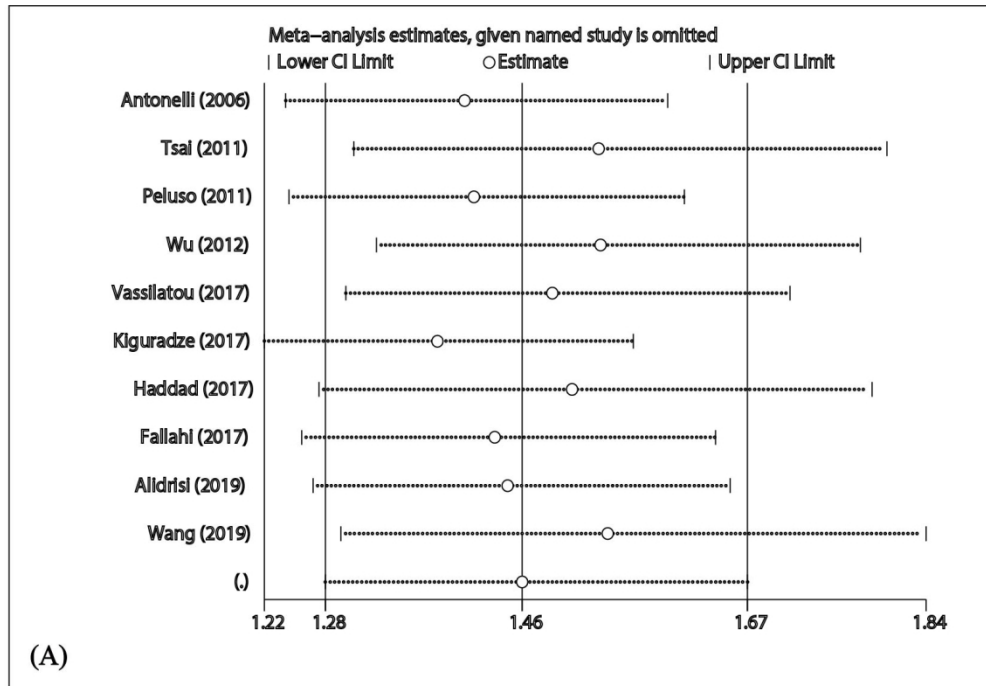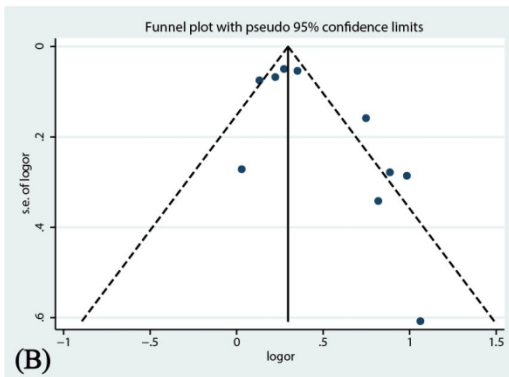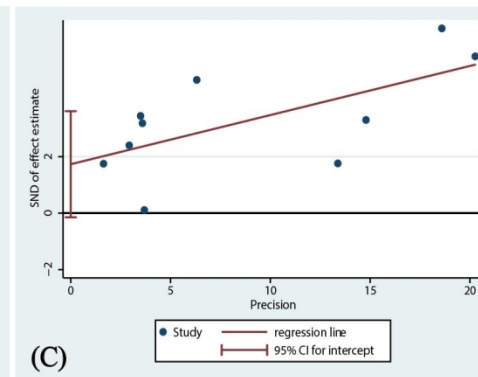

Sensitivity analysis and publication bias

141x150mm (300 x 300 DPI)

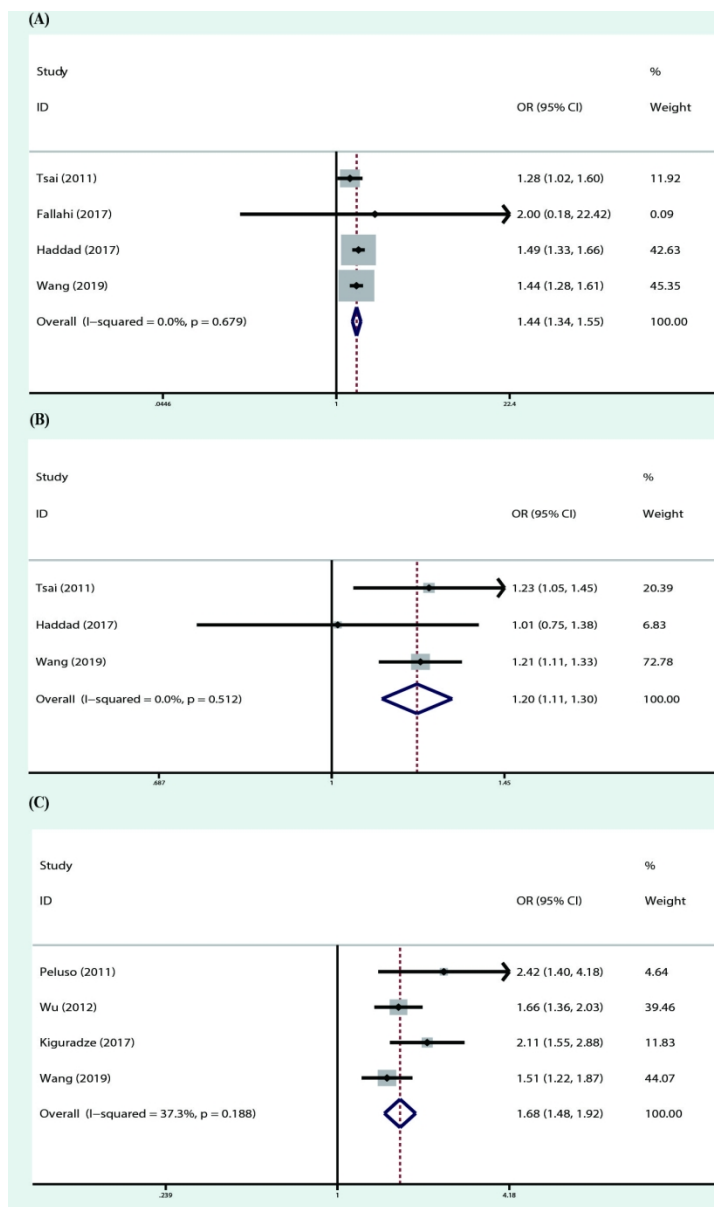

A: Forest plots of psoriasis and hypothyroidism B: Forest plots of psoriasis and hyperthyroidism C: Forest plots of psoriasis and HT

117x195mm (300 x 300 DPI)

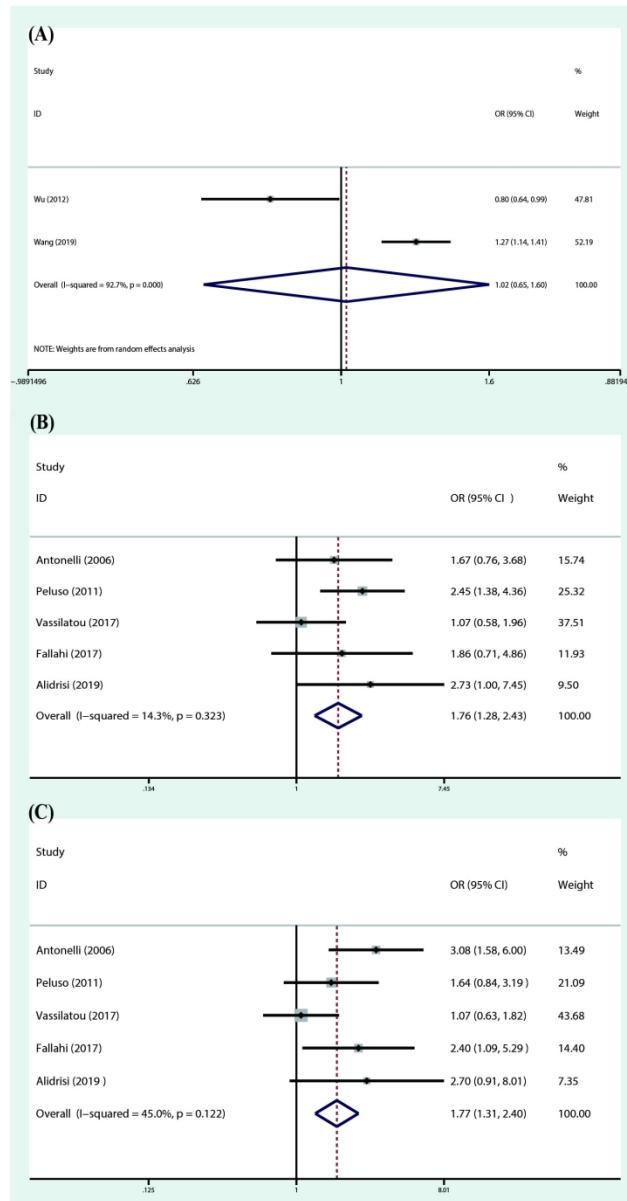

Fig. 5 A: Forest plots of psoriasis and GD B: Forest plots of psoriasis and TgAb C: Forest plots of psoriasis and TPOAb

124x237mm (300 x 300 DPI)

1  
2  
3  
4  
5  
6  
7  
8  
9  
10  
11  
12  
13  
14  
15  
16  
17  
18  
19  
20  
21  
22  
23  
24  
25  
26  
27  
28  
29  
30  
31  
32  
33  
34  
35  
36  
37  
38  
39  
40  
41  
42  
43  
44  
45  
46  
47  
48  
49  
50  
51  
52  
53  
54  
55  
56  
57  
58  
59  
60

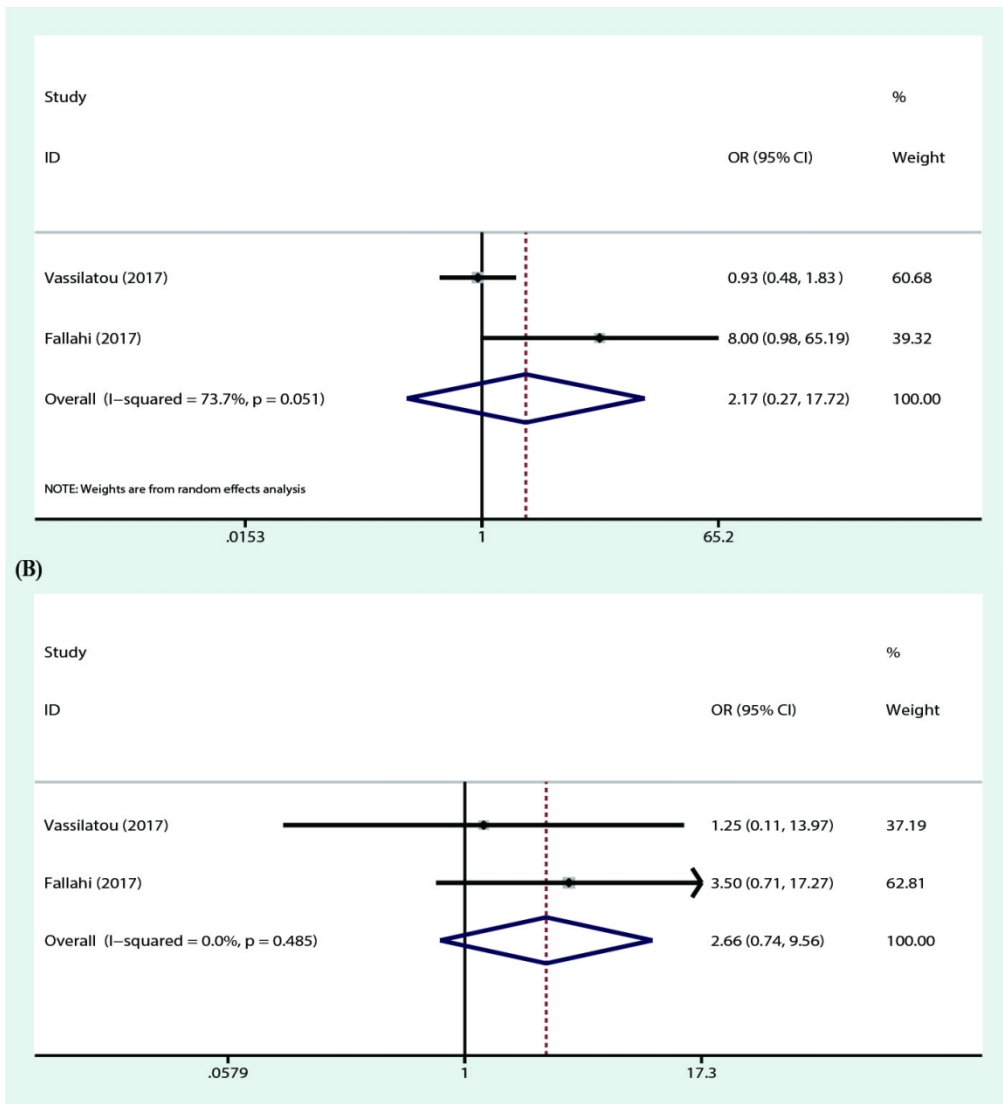

117x129mm (300 x 300 DPI)

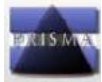

## PRISMA 2020 Checklist

| Section and Topic             | Item # | Checklist item                                                                                                                                                                                                                                                                                       | Location where item is reported |
|-------------------------------|--------|------------------------------------------------------------------------------------------------------------------------------------------------------------------------------------------------------------------------------------------------------------------------------------------------------|---------------------------------|
| <b>TITLE</b>                  |        |                                                                                                                                                                                                                                                                                                      |                                 |
| Title                         | 1      | Identify the report as a systematic review.                                                                                                                                                                                                                                                          | 1                               |
| <b>ABSTRACT</b>               |        |                                                                                                                                                                                                                                                                                                      |                                 |
| Abstract                      | 2      | See the PRISMA 2020 for Abstracts checklist.                                                                                                                                                                                                                                                         | 1                               |
| <b>INTRODUCTION</b>           |        |                                                                                                                                                                                                                                                                                                      |                                 |
| Rationale                     | 3      | Describe the rationale for the review in the context of existing knowledge.                                                                                                                                                                                                                          | 2                               |
| Objectives                    | 4      | Provide an explicit statement of the objective(s) or question(s) the review addresses.                                                                                                                                                                                                               | 2                               |
| <b>METHODS</b>                |        |                                                                                                                                                                                                                                                                                                      |                                 |
| Eligibility criteria          | 5      | Specify the inclusion and exclusion criteria for the review and how studies were grouped for the syntheses.                                                                                                                                                                                          | 5                               |
| Information sources           | 6      | Specify all databases, registers, websites, organisations, reference lists and other sources searched or consulted to identify studies. Specify the date when each source was last searched or consulted.                                                                                            | 5, Table 1                      |
| Search strategy               | 7      | Present the full search strategies for all databases, registers and websites, including any filters and limits used.                                                                                                                                                                                 | Table 1                         |
| Selection process             | 8      | Specify the methods used to decide whether a study met the inclusion criteria of the review, including how many reviewers screened each record and each report retrieved, whether they worked independently, and if applicable, details of automation tools used in the process.                     | 6, Figure 1                     |
| Data collection process       | 9      | Specify the methods used to collect data from reports, including how many reviewers collected data from each report, whether they worked independently, any processes for obtaining or confirming data from study investigators, and if applicable, details of automation tools used in the process. | 6, Figure 1                     |
| Data items                    | 10a    | List and define all outcomes for which data were sought. Specify whether all results that were compatible with each outcome domain in each study were sought (e.g. for all measures, time points, analyses), and if not, the methods used to decide which results to collect.                        | Table 3                         |
|                               | 10b    | List and define all other variables for which data were sought (e.g. participant and intervention characteristics, funding sources). Describe any assumptions made about any missing or unclear information.                                                                                         | Table 2                         |
| Study risk of bias assessment | 11     | Specify the methods used to assess risk of bias in the included studies, including details of the tool(s) used, how many reviewers assessed each study and whether they worked independently, and if applicable, details of automation tools used in the process.                                    | 6                               |
| Effect measures               | 12     | Specify for each outcome the effect measure(s) (e.g. risk ratio, mean difference) used in the synthesis or presentation of results.                                                                                                                                                                  | 7 - 10                          |
| Synthesis methods             | 13a    | Describe the processes used to decide which studies were eligible for each synthesis (e.g. tabulating the study intervention characteristics and comparing against the planned groups for each synthesis (item #5)).                                                                                 | Figure 1                        |
|                               | 13b    | Describe any methods required to prepare the data for presentation or synthesis, such as handling of missing summary statistics, or data conversions.                                                                                                                                                | 6                               |
|                               | 13c    | Describe any methods used to tabulate or visually display results of individual studies and syntheses.                                                                                                                                                                                               | Figure 2 - 5                    |
|                               | 13d    | Describe any methods used to synthesize results and provide a rationale for the choice(s). If meta-analysis was performed, describe the model(s), method(s) to identify the presence and extent of statistical heterogeneity, and software package(s) used.                                          | 6                               |
|                               | 13e    | Describe any methods used to explore possible causes of heterogeneity among study results (e.g. subgroup analysis, meta-regression).                                                                                                                                                                 | 7, 8                            |
|                               | 13f    | Describe any sensitivity analyses conducted to assess robustness of the synthesized results.                                                                                                                                                                                                         | Figure 3                        |
| Reporting bias assessment     | 14     | Describe any methods used to assess risk of bias due to missing results in a synthesis (arising from reporting biases).                                                                                                                                                                              | 8, Figure 3                     |
| Certainty assessment          | 15     | Describe any methods used to assess certainty (or confidence) in the body of evidence for an outcome.                                                                                                                                                                                                | 8, Figure 3                     |

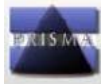

## PRISMA 2020 Checklist

| Section and Topic                              | Item # | Checklist item                                                                                                                                                                                                                                                                       | Location where item is reported |
|------------------------------------------------|--------|--------------------------------------------------------------------------------------------------------------------------------------------------------------------------------------------------------------------------------------------------------------------------------------|---------------------------------|
| <b>RESULTS</b>                                 |        |                                                                                                                                                                                                                                                                                      |                                 |
| Study selection                                | 16a    | Describe the results of the search and selection process, from the number of records identified in the search to the number of studies included in the review, ideally using a flow diagram.                                                                                         | Figure 1                        |
|                                                | 16b    | Cite studies that might appear to meet the inclusion criteria, but which were excluded, and explain why they were excluded.                                                                                                                                                          | ×                               |
| Study characteristics                          | 17     | Cite each included study and present its characteristics.                                                                                                                                                                                                                            | Table 2                         |
| Risk of bias in studies                        | 18     | Present assessments of risk of bias for each included study.                                                                                                                                                                                                                         | ×                               |
| Results of individual studies                  | 19     | For all outcomes, present, for each study: (a) summary statistics for each group (where appropriate) and (b) an effect estimate and its precision (e.g. confidence/credible interval), ideally using structured tables or plots.                                                     | Figure 2 - 5                    |
| Results of syntheses                           | 20a    | For each synthesis, briefly summarise the characteristics and risk of bias among contributing studies.                                                                                                                                                                               | 9                               |
|                                                | 20b    | Present results of all statistical syntheses conducted. If meta-analysis was done, present for each the summary estimate and its precision (e.g. confidence/credible interval) and measures of statistical heterogeneity. If comparing groups, describe the direction of the effect. | 8 - 9                           |
|                                                | 20c    | Present results of all investigations of possible causes of heterogeneity among study results.                                                                                                                                                                                       | 9                               |
|                                                | 20d    | Present results of all sensitivity analyses conducted to assess the robustness of the synthesized results.                                                                                                                                                                           | Figure 3                        |
| Reporting biases                               | 21     | Present assessments of risk of bias due to missing results (arising from reporting biases) for each synthesis assessed.                                                                                                                                                              | Figure 3                        |
| Certainty of evidence                          | 22     | Present assessments of certainty (or confidence) in the body of evidence for each outcome assessed.                                                                                                                                                                                  | Figure 3                        |
| <b>DISCUSSION</b>                              |        |                                                                                                                                                                                                                                                                                      |                                 |
| Discussion                                     | 23a    | Provide a general interpretation of the results in the context of other evidence.                                                                                                                                                                                                    | 11                              |
|                                                | 23b    | Discuss any limitations of the evidence included in the review.                                                                                                                                                                                                                      | 12                              |
|                                                | 23c    | Discuss any limitations of the review processes used.                                                                                                                                                                                                                                | 12                              |
|                                                | 23d    | Discuss implications of the results for practice, policy, and future research.                                                                                                                                                                                                       | 13                              |
| <b>OTHER INFORMATION</b>                       |        |                                                                                                                                                                                                                                                                                      |                                 |
| Registration and protocol                      | 24a    | Provide registration information for the review, including register name and registration number, or state that the review was not registered.                                                                                                                                       | 2                               |
|                                                | 24b    | Indicate where the review protocol can be accessed, or state that a protocol was not prepared.                                                                                                                                                                                       | ×                               |
|                                                | 24c    | Describe and explain any amendments to information provided at registration or in the protocol.                                                                                                                                                                                      | ×                               |
| Support                                        | 25     | Describe sources of financial or non-financial support for the review, and the role of the funders or sponsors in the review.                                                                                                                                                        | 14                              |
| Competing interests                            | 26     | Declare any competing interests of review authors.                                                                                                                                                                                                                                   | 14                              |
| Availability of data, code and other materials | 27     | Report which of the following are publicly available and where they can be found: template data collection forms; data extracted from included studies; data used for all analyses; analytic code; any other materials used in the review.                                           | Table 1                         |

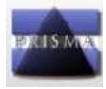

## PRISMA 2020 Checklist

For more information, visit: <http://www.prisma-statement.org/>

For peer review only

1  
2  
3  
4  
5  
6  
7  
8  
9  
10  
11  
12  
13  
14  
15  
16  
17  
18  
19  
20  
21  
22  
23  
24  
25  
26  
27  
28  
29  
30  
31  
32  
33  
34  
35  
36  
37  
38  
39  
40  
41  
42  
43  
44  
45  
46  
47

# BMJ Open

## The prevalence of autoimmune thyroid disease in patients with psoriasis: a meta-analysis

|                                 |                                                                                                                                                                                                                                                                                                                                                                                                                                                                                                                                                                                                  |
|---------------------------------|--------------------------------------------------------------------------------------------------------------------------------------------------------------------------------------------------------------------------------------------------------------------------------------------------------------------------------------------------------------------------------------------------------------------------------------------------------------------------------------------------------------------------------------------------------------------------------------------------|
| Journal:                        | <i>BMJ Open</i>                                                                                                                                                                                                                                                                                                                                                                                                                                                                                                                                                                                  |
| Manuscript ID                   | bmjopen-2021-055538.R1                                                                                                                                                                                                                                                                                                                                                                                                                                                                                                                                                                           |
| Article Type:                   | Original research                                                                                                                                                                                                                                                                                                                                                                                                                                                                                                                                                                                |
| Date Submitted by the Author:   | 02-Dec-2021                                                                                                                                                                                                                                                                                                                                                                                                                                                                                                                                                                                      |
| Complete List of Authors:       | Zhang, Xiaochao; Central South University, Dermatology; Second Xiangya Hospital Department of Dermatology<br>Zhang, Suhan; Central South University, Dermatology; Second Xiangya Hospital Department of Dermatology<br>Wu, Ruifang; Central South University, Dermatology; Second Xiangya Hospital, Dermatology<br>Li, Siying; Central South University, Dermatology; Second Xiangya Hospital, Dermatology<br>Su, Yuwen; Central South University, Dermatology; Second Xiangya Hospital, Dermatology<br>Zhang, Peng; Central South University, Dermatology; Second Xiangya Hospital, Dermatology |
| <b>Primary Subject Heading</b>: | Dermatology                                                                                                                                                                                                                                                                                                                                                                                                                                                                                                                                                                                      |
| Secondary Subject Heading:      | Dermatology, Immunology (including allergy)                                                                                                                                                                                                                                                                                                                                                                                                                                                                                                                                                      |
| Keywords:                       | Thyroid disease < DIABETES & ENDOCRINOLOGY, IMMUNOLOGY, Psoriasis < DERMATOLOGY                                                                                                                                                                                                                                                                                                                                                                                                                                                                                                                  |
|                                 |                                                                                                                                                                                                                                                                                                                                                                                                                                                                                                                                                                                                  |

SCHOLARONE™  
Manuscripts





I, the Submitting Author has the right to grant and does grant on behalf of all authors of the Work (as defined in the below author licence), an exclusive licence and/or a non-exclusive licence for contributions from authors who are: i) UK Crown employees; ii) where BMJ has agreed a CC-BY licence shall apply, and/or iii) in accordance with the terms applicable for US Federal Government officers or employees acting as part of their official duties; on a worldwide, perpetual, irrevocable, royalty-free basis to BMJ Publishing Group Ltd ("BMJ") its licensees and where the relevant Journal is co-owned by BMJ to the co-owners of the Journal, to publish the Work in this journal and any other BMJ products and to exploit all rights, as set out in our [licence](#).

The Submitting Author accepts and understands that any supply made under these terms is made by BMJ to the Submitting Author unless you are acting as an employee on behalf of your employer or a postgraduate student of an affiliated institution which is paying any applicable article publishing charge ("APC") for Open Access articles. Where the Submitting Author wishes to make the Work available on an Open Access basis (and intends to pay the relevant APC), the terms of reuse of such Open Access shall be governed by a Creative Commons licence – details of these licences and which [Creative Commons](#) licence will apply to this Work are set out in our licence referred to above.

Other than as permitted in any relevant BMJ Author's Self Archiving Policies, I confirm this Work has not been accepted for publication elsewhere, is not being considered for publication elsewhere and does not duplicate material already published. I confirm all authors consent to publication of this Work and authorise the granting of this licence.

1  
2  
3  
4  
5 The prevalence of autoimmune thyroid disease in patients with psoriasis: a  
6 meta-analysis  
7  
8  
9  
10

11  
12 Xiaochao Zhang<sup>1#</sup>, Suhan Zhang<sup>1#</sup>, Ruifang Wu<sup>1</sup>, Siying Li<sup>1</sup>, Yuwen Su<sup>1\*</sup>, Peng  
13 Zhang<sup>1\*</sup>  
14

15  
16  
17 1. Department of Dermatology, The Second Xiangya Hospital, Central South  
18 University  
19

20  
21 # Both two authors contributed equally to this work.  
22  
23

24  
25  
26 \* Correspondence to: Yuwen Su, Department of Dermatology, The Second Xiangya  
27 Hospital, Central South University, 139th Renmin Middle Road, Furong district,  
28 Changsha, Hunan, 410011, China  
29

30  
31 Phone: 086-13755116633 Email: [suyuwen1963@csu.edu.cn](mailto:suyuwen1963@csu.edu.cn)  
32

33  
34  
35 Peng Zhang, Department of Dermatology, The Second Xiangya Hospital, Central South  
36 University, 139<sup>th</sup> Renmin Middle Road, Furong district, Changsha, Hunan, 410011,  
37 China  
38  
39

40  
41 Phone: 086-15874291251 Email: [zhangpeng@csu.edu.cn](mailto:zhangpeng@csu.edu.cn)  
42

43  
44 Running title: A meta-analysis of AITD and psoriasis  
45  
46  
47  
48  
49  
50  
51  
52  
53  
54  
55  
56  
57  
58  
59  
60

## Abstract

**Objective** Psoriasis is a chronic inflammatory disease with autoimmune etiology. A possible link between psoriasis and autoimmune thyroid disease (AITD) has been suggested in some studies with inconsistent findings. This meta-analysis aims to determine the association between psoriasis and AITD.

**Design** A Meta-analysis of observational studies.

**Data sources** PubMed, EMBASE, Scopus, and the Cochrane Library were searched up to November 1st, 2021.

**Eligibility criteria for selecting studies** We included non-randomized studies, each with over 50 cases in every group, focusing on the rate of comorbidity between psoriasis and AITD.

**Data extraction and synthesis** Two independent reviewers screened the articles and extracted data. The restricted maximum-likelihood was applied to perform the meta-analysis. Odds ratio (OR) and 95% confidence intervals (CI) were pooled to compare the prevalence of AITD in psoriasis and control groups. Heterogeneity was assessed with  $I^2$  statistic. The Newcastle-Ottawa Scale (NOS) and Agency for Healthcare Research and Quality (AHRQ) were applied for quality assessment. The risk of bias was assessed with ROBINS-I.

**Results** Eleven available studies with data on 253,313 patients with psoriasis and 1,376,533 controls were included. Meta-analysis showed that patients with psoriasis had a higher prevalence of AITD (OR = 1.76, 95% CI: 1.35 - 2.28,  $Z = 4.25$ ,  $p < 0.01$ ), especially loss-of-function disorder of the thyroid gland. Both TgAb positive rate (OR = 1.98, 95% CI: 1.27 - 3.10,  $Z = 3.00$ ,  $p < 0.01$ ) and TPOAb positive rate (OR = 2.15, 95% CI: 1.31 - 3.52,  $Z = 3.05$ ,  $p < 0.01$ ) were also increased in the psoriasis group compared

1  
2  
3  
4  
5  
6  
7  
8  
9  
10  
11  
12  
13  
14  
15  
16  
17  
18  
19  
20  
21  
22  
23  
24  
25  
26  
27  
28  
29  
30  
31  
32  
33  
34  
35  
36  
37  
38  
39  
40  
41  
42  
43  
44  
45  
46  
47  
48  
49  
50  
51  
52  
53  
54  
55  
56  
57  
58  
59  
60

to the control group.

**Conclusions** Our study indicates that the rate of co-occurring AITD was significantly increased in patients with psoriasis. It suggests that the increased risk of AITD should be concerned in patients with psoriasis.

**PROSPERO registration number** CRD42020206005

Keywords: Psoriasis, Thyroid, Immunology

### **Strengths and limitations of this study**

This is the first meta-analysis focusing on the risk of AITD for psoriasis patients, which included hypothyroidism, hyperthyroidism, subclinical hypothyroidism, subclinical hyperthyroidism, Hashimoto's thyroiditis, Graves' disease, TgAb positivity and TPOAb positivity.

All studies included were of moderate to high quality and were representative. All studies were published in recent years.

The heterogeneity in the pooled data cannot be ignored, and was not improved by subgroup analysis. However, meta-regression analysis identified the differences of sample size and scope of research on AITD among these studies as the potential sources of heterogeneity.

## INTRODUCTION

Psoriasis is a chronic inflammatory disease with autoimmune etiology, affecting approximately 125 million people around the world.<sup>1</sup> The skin lesions of psoriasis occur mainly on the scalp, trunk, and exterior surfaces of the limbs, and manifest as erythema, plaques, and scales.<sup>2</sup> Apart from the impaired appearance and intense pruritus of the skin lesions, various comorbidities have a significant impact on the quality of life in patients with psoriasis.<sup>3 4</sup> Among the comorbidities, autoimmune thyroid disease (AITD) has been characterized in patients with psoriasis. For patients with psoriasis who also develop complications, their management requires extra attention.<sup>5</sup> Therefore, understanding the risk of other diseases on psoriasis has important clinical significance.

Autoimmune thyroid disease (AITD) is an inflammatory disease of the thyroid gland with the presence of thyroid autoantibodies, lymphocytic infiltration of thyroid parenchyma, and even thyroid dysfunction.<sup>6</sup> Graves' disease (GD) and Hashimoto's thyroiditis (HT) are the two main clinical subtypes of AITD. GD is characterized by hyperthyroidism and the presence of thyroid-stimulating hormone receptor antibodies (TRAb) in serum, while HT is characterized by hypothyroidism and the presence of thyroid peroxidase antibodies (TPOAb) or Thyroglobulin antibodies (TgAb) in serum.<sup>7</sup>

Psoriasis and AITD share some common pathophysiological features, such as Th1-predominant adaptive immune reaction.<sup>6</sup> Hence, the relationship between AITD and psoriasis has been hypothesized and studied. In 2006, Antonelli *et al.* first

1  
2  
3  
4 reported that the prevalence of AITD in patients with psoriatic arthritis was  
5  
6 significantly higher than in the general population.<sup>8</sup> However, the study reported by  
7  
8 Tsai *et al.*<sup>9</sup> pointed that the association between psoriasis and AITD was limited. In  
9  
10 recent years, several observational studies regarding the association between psoriasis  
11  
12 and AITD were published in succession, but the results of the studies were  
13  
14 inconsistent.<sup>10-16</sup> In addition, Karadag *et al.* reported that the commonly administered  
15  
16 acitretin treatment for psoriasis system treatment affects the levels of free T4 (thyroid  
17  
18 hormone).<sup>17</sup> To address this discrepancy, we designed and performed a meta-analysis  
19  
20 with the existing evidence to assess the relationship between psoriasis and AITD and  
21  
22 provide guidance on the clinical management of psoriasis.  
23  
24  
25  
26  
27  
28

## 29 30 **METHODS**

### 31 32 **Search strategy**

33  
34 The literature search was conducted through PubMed, EMBASE, Scopus, and  
35  
36 the Cochrane Library for relevant studies published before November 1st, 2021.  
37  
38 Detailed literature-search strategies of the databases are presented in Table 1.  
39  
40

### 41 42 **Inclusion and exclusion criteria**

43  
44 The inclusion criteria for the studies included in our analysis were the following:  
45  
46 (1) The prevalence of AITD in patients with psoriasis/psoriatic arthritis and  
47  
48 non-psoriasis were studied; (2) The study was a cohort study, case-control study, or  
49  
50 cross-sectional study; (3) The observed indicators were at least one of the following  
51  
52 outcomes: the prevalence of hypothyroidism, hyperthyroidism, HT, GD, or the  
53  
54 positive rate of TPOAb, TgAb, or TRAb; (4) The number of patients with psoriasis  
55  
56  
57  
58  
59  
60

1  
2  
3  
4 and the control group should be over 50. Drug-related studies, animal studies, reviews,  
5  
6 and conference abstracts were excluded from our analysis.  
7  
8

### 9 **Data extraction**

10  
11 The specific process for analyzing the studies generated from the search was as  
12  
13 follows: record screening and data extraction were performed by two independent  
14  
15 authors (X Zhang and S Zhang) according to the above retrieval strategy. In case of  
16  
17 dispute, the third author(R Wu) would reassess and reach an agreed decision after  
18  
19 discussion. The following information in the included studies was extracted: the name  
20  
21 of the first author, year of publication, country of origin, study design, sample size,  
22  
23 the definition of psoriasis and AITD, gender ratio, and mean age.  
24  
25  
26  
27  
28  
29

### 30 **Quality assessment**

31  
32 The Newcastle-Ottawa Scale (NOS)<sup>18</sup> was used to assess the quality of the  
33  
34 included cohort and case-control studies. The quality of the study was scored by three  
35  
36 dimensions: selection, comparability, and exposure/outcome. Studies that achieved  
37  
38 0-3, 4-6, 7-9 scores were considered of low, moderate and high qualities respectively.  
39  
40 Additionally, the tools recommended by the Agency for Healthcare Research and  
41  
42 Quality (AHRQ)<sup>19</sup> were used for the cross-sectional studies. Eleven items were  
43  
44 included in AHRQ. The study would get one point if the answer “Yes”, otherwise no  
45  
46 point was got. Studies achieved: 0-3, 4-7, and 8-11 points were considered of low,  
47  
48 moderate and high qualities respectively. Moreover, the ROBINS-I was used to assess  
49  
50 the risk of bias.<sup>20</sup> The assessments were carried by two authors (X Zhang and S  
51  
52 Zhang), and checked by the third author(R Wu).  
53  
54  
55  
56  
57  
58  
59  
60

1  
2  
3  
4 The meta-analysis was performed using the Stata 16.0 software. We used the  
5  
6 odds ratio (OR) and 95% confidence intervals (CI) to describe the differences  
7  
8 between groups. The statistical difference was considered significant when  $p < 0.05$ .  
9  
10 The prediction interval was used to explore the prevalence of AITD in individuals  
11  
12 with psoriasis. The  $I^2$  statistic was used to evaluate heterogeneity as follows:  $I^2 \leq 25\%$ ,  
13  
14 no heterogeneity;  $25\% \leq I^2 \leq 50\%$ , mild heterogeneity;  $50\% < I^2 \leq 75\%$ , moderate  
15  
16 heterogeneity;  $I^2 > 75\%$ , severe heterogeneity. The random effects model was applied  
17  
18 throughout the analyses. Publication bias was assessed by funnel plot and Egger's test  
19  
20 (Publication bias was considered when  $p < 0.1$ ). Sensitivity analysis was performed to  
21  
22 assess the stability of the meta-analysis by omitting one study in each turn. Univariate  
23  
24 meta-regression analysis was used to investigate the sources of heterogeneity. The  
25  
26 flow chart was drawn in Adobe Illustrator, and the forest plots, funnel plots, and  
27  
28 Egger's test charts were drawn by Stata 16.0 software.  
29  
30  
31  
32  
33  
34  
35  
36  
37

### 38 **Patient and public involvement**

39  
40 There were not patients or the public involved in this review.  
41  
42

## 43 **RESULTS**

### 44 **Search results**

45  
46  
47  
48 After removing duplicate results, we identified 6380 published studies in the  
49  
50 initial search: 6377 studies were included by searching through databases and three  
51  
52 studies were harvested by manually searching the references of relevant studies. After  
53  
54 screening the titles and abstracts, the remaining 42 studies underwent further full-text  
55  
56 screening. Eventually, 11 studies<sup>8-16 21 22</sup> that met the inclusion criteria were included  
57  
58  
59  
60



1  
2  
3  
4 in the final analysis (figure. 1).  
5

### 6 **Study characteristics**

7  
8  
9 The basic characteristics of the included studies are shown in Tables 2 and 3. A  
10 total of 253,313 patients with psoriasis and 1,376,533 control patients were included  
11 in the analysis. Two of the studies were cohort studies, eight were case-controlled  
12 studies, and one was a cross-sectional study.  
13  
14  
15  
16  
17

### 18 **Quality of studies**

19  
20 Overall, five studies were of high qualities and six of moderate ones (Table 3). In  
21 the studies checked with NOS (n=10), five studies were considered of moderate  
22 qualities because the control groups were not from the same community. The only  
23 cross-sectional study checked with AHRQ was a moderate quality study due to  
24 confounding controlling was not clear. Based on ROBINS-I, all included studies had  
25 moderate risk in overall bias (Table 4).  
26  
27  
28  
29  
30  
31  
32  
33  
34  
35  
36

### 37 **Prevalence of AITD in patients with psoriasis**

38  
39  
40 Eleven studies provided available data on the prevalence of AITD in patients  
41 with psoriasis. The meta-analysis showed that patients with psoriasis had a higher  
42 prevalence of AITD than the controls (OR = 1.76, 95% CI: 1.35 - 2.28, Z = 4.25, *p*  
43 <0.01). The prediction interval ranged from 0.79 to 2.73, and the heterogeneity was  
44 severe ( $I^2 = 92.72\%$ ).  
45  
46  
47  
48  
49  
50  
51  
52

### 53 **Heterogeneity analysis**

54  
55  
56 To investigate potential sources of heterogeneity, we firstly performed a  
57 subgroup analysis by types of study design. The high rate of comorbidity between  
58  
59  
60

1  
2  
3  
4 psoriasis and AITD was also observed in the cross-sectional study strata (OR = 2.12,  
5  
6 95% CI: 1.55 - 2.89), and in the case-control study strata (OR = 1.75, 95% CI: 1.23 -  
7  
8 2.48,  $Z = 3.14$ ,  $p < 0.01$ ) but with heterogeneity remaining severe (figure. 2), which  
9  
10 indicated that inconsistency of the study designs was not the source of high  
11  
12 heterogeneity.  
13  
14  
15

16  
17 We further conducted a meta-regression analysis to explore the reason for  
18  
19 between-study heterogeneity. Seven variables were included in the regression model,  
20  
21 covering average age, sex ratio, nation (China or other counties), race (Caucasian or  
22  
23 non-Caucasian), sample size, clinical types of psoriasis (psoriasis vulgaris or psoriatic  
24  
25 arthritis), and scope of research on AITD (all studies were divided into two categories:  
26  
27 the one focusing on the loss-of-function disorder of the thyroid gland alone; another  
28  
29 one focusing on both the loss-of-function disorder and hyperfunction disorder of the  
30  
31 thyroid gland). When the criterion was set as  $p < 0.1$ , sample size ( $\beta = -0.40$ ,  $S.E. =$   
32  
33  $0.20$ ,  $p = 0.07$ ) and scope of research on AITD ( $\beta = 0.45$ ,  $S.E. = 0.15$ ,  $p = 0.02$ ) were  
34  
35 the potential sources of high heterogeneity.  
36  
37  
38  
39  
40  
41  
42

43 Besides, we removed three studies<sup>8 13 21</sup> outside the funnel plot and then  
44  
45 conducted the meta-analysis again. The results of the reanalysis also showed that  
46  
47 patients with psoriasis had a higher prevalence of AITD than the controls (OR = 1.34,  
48  
49 CI: 1.20-1.50,  $Z = 5.07$ ,  $p < 0.01$ ), but with moderate heterogeneity ( $I^2 = 57.30\%$ ). The  
50  
51 results indicated that these three studies might also contribute to on severe  
52  
53 heterogeneity of previous analysis. The source of heterogeneity in the study of  
54  
55 Antonelli *et al.* was that all the patients were patients with psoriatic arthritis,<sup>8</sup> and the  
56  
57  
58  
59  
60

1  
2  
3  
4 prevalence of AITD in patients with psoriatic arthritis may be higher than that of  
5  
6 patients with psoriasis.<sup>23</sup> The source of heterogeneity in the study by Peluso *et al.* may  
7  
8 have been due to the control group being comprised of hospital staff rather than the  
9  
10 general population.<sup>21</sup> The source of heterogeneity in the study of Kiguradze *et al.* may  
11  
12 lie in the fact that it was a cross-sectional study.<sup>13</sup> These three studies were not  
13  
14 excluded because they had little effect on the final results of the analysis.  
15  
16  
17  
18

### 19 **Sensitivity analysis and publication bias**

20  
21  
22 Omission of either of the included studies did not significantly change the  
23  
24 confidence interval of the combined effect (figure. 3A). Therefore, the results of the  
25  
26 analysis were reliable and stable. The funnel plot for the publication bias is shown in  
27  
28 figure. 3B. The results of Egger's test showed significant publication bias ( $p = 0.036$ ,  
29  
30 figure. 3C). There was a possibility of exaggerating the association between psoriasis  
31  
32 and AITD.  
33  
34  
35  
36  
37

### 38 **Psoriasis and thyroid function status**

39  
40 Patients with psoriasis had a higher prevalence of hypothyroidism than the  
41  
42 controls (OR = 1.21, 95% CI: 1.12 - 1.30,  $Z = 4.80$ ,  $p < 0.01$ ) and no significant  
43  
44 heterogeneity was observed ( $I^2 = 0.00\%$ ). Patients with psoriasis had a higher  
45  
46 prevalence of hyperthyroidism than the controls (OR = 1.20, 95% CI: 1.12 - 1.30,  
47  
48  $Z = 4.78$ ,  $p < 0.01$ ) and no significant heterogeneity was observed ( $I^2 = 0.00\%$ , figure.  
49  
50  
51  
52  
53  
54  
55  
56  
57  
58  
59  
60  
4A-B).

61  
62  
63  
64  
65  
66  
67  
68  
69  
70  
71  
72  
73  
74  
75  
76  
77  
78  
79  
80  
81  
82  
83  
84  
85  
86  
87  
88  
89  
90  
91  
92  
93  
94  
95  
96  
97  
98  
99  
100  
101  
102  
103  
104  
105  
106  
107  
108  
109  
110  
111  
112  
113  
114  
115  
116  
117  
118  
119  
120  
121  
122  
123  
124  
125  
126  
127  
128  
129  
130  
131  
132  
133  
134  
135  
136  
137  
138  
139  
140  
141  
142  
143  
144  
145  
146  
147  
148  
149  
150  
151  
152  
153  
154  
155  
156  
157  
158  
159  
160  
161  
162  
163  
164  
165  
166  
167  
168  
169  
170  
171  
172  
173  
174  
175  
176  
177  
178  
179  
180  
181  
182  
183  
184  
185  
186  
187  
188  
189  
190  
191  
192  
193  
194  
195  
196  
197  
198  
199  
200  
201  
202  
203  
204  
205  
206  
207  
208  
209  
210  
211  
212  
213  
214  
215  
216  
217  
218  
219  
220  
221  
222  
223  
224  
225  
226  
227  
228  
229  
230  
231  
232  
233  
234  
235  
236  
237  
238  
239  
240  
241  
242  
243  
244  
245  
246  
247  
248  
249  
250  
251  
252  
253  
254  
255  
256  
257  
258  
259  
260  
261  
262  
263  
264  
265  
266  
267  
268  
269  
270  
271  
272  
273  
274  
275  
276  
277  
278  
279  
280  
281  
282  
283  
284  
285  
286  
287  
288  
289  
290  
291  
292  
293  
294  
295  
296  
297  
298  
299  
300  
301  
302  
303  
304  
305  
306  
307  
308  
309  
310  
311  
312  
313  
314  
315  
316  
317  
318  
319  
320  
321  
322  
323  
324  
325  
326  
327  
328  
329  
330  
331  
332  
333  
334  
335  
336  
337  
338  
339  
340  
341  
342  
343  
344  
345  
346  
347  
348  
349  
350  
351  
352  
353  
354  
355  
356  
357  
358  
359  
360  
361  
362  
363  
364  
365  
366  
367  
368  
369  
370  
371  
372  
373  
374  
375  
376  
377  
378  
379  
380  
381  
382  
383  
384  
385  
386  
387  
388  
389  
390  
391  
392  
393  
394  
395  
396  
397  
398  
399  
400  
401  
402  
403  
404  
405  
406  
407  
408  
409  
410  
411  
412  
413  
414  
415  
416  
417  
418  
419  
420  
421  
422  
423  
424  
425  
426  
427  
428  
429  
430  
431  
432  
433  
434  
435  
436  
437  
438  
439  
440  
441  
442  
443  
444  
445  
446  
447  
448  
449  
450  
451  
452  
453  
454  
455  
456  
457  
458  
459  
460  
461  
462  
463  
464  
465  
466  
467  
468  
469  
470  
471  
472  
473  
474  
475  
476  
477  
478  
479  
480  
481  
482  
483  
484  
485  
486  
487  
488  
489  
490  
491  
492  
493  
494  
495  
496  
497  
498  
499  
500  
501  
502  
503  
504  
505  
506  
507  
508  
509  
510  
511  
512  
513  
514  
515  
516  
517  
518  
519  
520  
521  
522  
523  
524  
525  
526  
527  
528  
529  
530  
531  
532  
533  
534  
535  
536  
537  
538  
539  
540  
541  
542  
543  
544  
545  
546  
547  
548  
549  
550  
551  
552  
553  
554  
555  
556  
557  
558  
559  
560  
561  
562  
563  
564  
565  
566  
567  
568  
569  
570  
571  
572  
573  
574  
575  
576  
577  
578  
579  
580  
581  
582  
583  
584  
585  
586  
587  
588  
589  
590  
591  
592  
593  
594  
595  
596  
597  
598  
599  
600  
601  
602  
603  
604  
605  
606  
607  
608  
609  
610  
611  
612  
613  
614  
615  
616  
617  
618  
619  
620  
621  
622  
623  
624  
625  
626  
627  
628  
629  
630  
631  
632  
633  
634  
635  
636  
637  
638  
639  
640  
641  
642  
643  
644  
645  
646  
647  
648  
649  
650  
651  
652  
653  
654  
655  
656  
657  
658  
659  
660  
661  
662  
663  
664  
665  
666  
667  
668  
669  
670  
671  
672  
673  
674  
675  
676  
677  
678  
679  
680  
681  
682  
683  
684  
685  
686  
687  
688  
689  
690  
691  
692  
693  
694  
695  
696  
697  
698  
699  
700  
701  
702  
703  
704  
705  
706  
707  
708  
709  
710  
711  
712  
713  
714  
715  
716  
717  
718  
719  
720  
721  
722  
723  
724  
725  
726  
727  
728  
729  
730  
731  
732  
733  
734  
735  
736  
737  
738  
739  
740  
741  
742  
743  
744  
745  
746  
747  
748  
749  
750  
751  
752  
753  
754  
755  
756  
757  
758  
759  
760  
761  
762  
763  
764  
765  
766  
767  
768  
769  
770  
771  
772  
773  
774  
775  
776  
777  
778  
779  
780  
781  
782  
783  
784  
785  
786  
787  
788  
789  
790  
791  
792  
793  
794  
795  
796  
797  
798  
799  
800  
801  
802  
803  
804  
805  
806  
807  
808  
809  
810  
811  
812  
813  
814  
815  
816  
817  
818  
819  
820  
821  
822  
823  
824  
825  
826  
827  
828  
829  
830  
831  
832  
833  
834  
835  
836  
837  
838  
839  
840  
841  
842  
843  
844  
845  
846  
847  
848  
849  
850  
851  
852  
853  
854  
855  
856  
857  
858  
859  
860  
861  
862  
863  
864  
865  
866  
867  
868  
869  
870  
871  
872  
873  
874  
875  
876  
877  
878  
879  
880  
881  
882  
883  
884  
885  
886  
887  
888  
889  
890  
891  
892  
893  
894  
895  
896  
897  
898  
899  
900  
901  
902  
903  
904  
905  
906  
907  
908  
909  
910  
911  
912  
913  
914  
915  
916  
917  
918  
919  
920  
921  
922  
923  
924  
925  
926  
927  
928  
929  
930  
931  
932  
933  
934  
935  
936  
937  
938  
939  
940  
941  
942  
943  
944  
945  
946  
947  
948  
949  
950  
951  
952  
953  
954  
955  
956  
957  
958  
959  
960  
961  
962  
963  
964  
965  
966  
967  
968  
969  
970  
971  
972  
973  
974  
975  
976  
977  
978  
979  
980  
981  
982  
983  
984  
985  
986  
987  
988  
989  
990  
991  
992  
993  
994  
995  
996  
997  
998  
999  
1000

(Subclinical hypothyroidism: OR = 2.24, 95% CI: 0.26 - 19.13, Z = 0.74,  $p = 0.46$ ).

Subclinical hyperthyroidism: OR = 2.66, 95% CI: 0.70 - 10.07, Z = 1.44,  $p = 0.15$ ).

However, the difference was not statistically significant (Supplementary figure. 1 A-B).

### **Psoriasis and specific autoimmune thyroid diseases**

The prevalence of HT in patients with psoriasis and the controls was 0.215% and 0.199%, respectively. In comparison, the prevalence of GD in patients with psoriasis and the controls was 0.443% and 0.405%, respectively. The prevalence of HT was significantly higher in patients with psoriasis than the controls (OR = 1.88, 95% CI: 1.50 - 2.35, Z = 5.47,  $p < 0.01$ ) and the heterogeneity was moderate ( $I^2 = 55.98\%$ ). The prevalence of GD was also higher in patients with psoriasis than the controls (OR = 1.02, 95% CI: 0.65 - 1.60, Z = 0.07,  $p = 0.94$ ) and the heterogeneity was severe ( $I^2 = 92.78\%$ ). However, the difference was not statistically significant (figure. 4C, figure. 5A).

### **Psoriasis and thyroid serological antibodies**

No studies provided data on the positive rate of TRAb in patients with psoriasis, so we only included TgAb and TPOAb in the meta-analysis (figure. 5B-C). The positive rate of TgAb was significantly higher in patients with psoriasis than the controls (OR = 1.98, 95% CI: 1.27 - 3.10, Z = 3.00,  $p < 0.01$ ) and the heterogeneity was mild ( $I^2 = 41.54\%$ ). The positive rate of TPOAb was significantly higher in patients with psoriasis than the controls (OR = 2.15, 95% CI: 1.31 - 3.52, Z = 3.05,  $p < 0.01$ ) and the heterogeneity was moderate ( $I^2 = 56.27\%$ ).

## DISCUSSION

To our knowledge, this is the first meta-analysis focusing on the risk of AITD for psoriasis patients. The study by Khan *et al.* is the first meta-analysis of studies on the association between AITD and the incidence risk of psoriasis.<sup>24</sup> By summarizing all available evidence on the association between psoriasis and AITD, we found that the prevalence of AITD, particularly HT, was higher in patients with psoriasis than the control individuals. Additionally, elevated positive rates of TgAb and TPOAb were also observed in patients with psoriasis. As psoriasis is a type of discosmetic dermatosis and therefore likely to be of concern, patients with psoriasis are more likely to be active about seeing a doctor regarding their condition than patients with AITD. As such, we recommend that patients with psoriasis receive a thyroid-related examination when they have suspicious AITD-related symptoms. By promoting early diagnosis and treatment of AITD, patients may be able to avoid thyroid dysfunction.

### Main findings

The primary finding of this meta-analysis is that the prevalence of AITD is increased in patients with psoriasis compared with the general population. However, severe heterogeneity was observed. In order to determine whether or not the inconsistency of the study designs was the primary source of heterogeneity, the subgroup analysis based on different study designs was conducted. However, the heterogeneity was not limited by subgroup analysis; hence the heterogeneity in this meta-analysis was not caused by inconsistency of the study design. Through further meta-regression analysis, we found that the differences in sample size and scope of

1  
2  
3  
4 research on AITD among these studies might explain the high level of between-study  
5  
6 heterogeneity. Furthermore, the heterogeneity was improved when we focused on the  
7  
8 link of psoriasis with specific clinical characters of AITD, such as hypothyroidism,  
9  
10 hyperthyroidism, and the positivity rate of autoantibodies.  
11  
12

13  
14 According to the definition of the study designs, an accurate cause-effect  
15  
16 relationship can only be demonstrated in cohort studies. The present study included  
17  
18 three types of study designs, including cohort, case-controlled, and cross-sectional  
19  
20 studies. Therefore, the results should be interpreted with caution. Additionally, it has  
21  
22 been demonstrated that the prevalence of HT in patients with psoriasis is elevated  
23  
24 compared with the controls. HT, a main clinical subtype of AITD, is generally  
25  
26 accompanied by hypothyroidism. An elevated frequency of hypothyroidism was also  
27  
28 observed in patients with psoriasis. Taken together, the current data indicates that  
29  
30 psoriasis may be closely associated with the loss-of-function disorder of the thyroid  
31  
32 gland.  
33  
34  
35  
36  
37  
38

### 39 40 **Common pathogenesis of psoriasis and AITD**

41  
42 Both Abnormal immunological reactions and underlying genetic risk can  
43  
44 contribute to the pathogenesis of psoriasis and AITD.<sup>25 26</sup> These two diseases share  
45  
46 some autoimmune processes and susceptibility genes, which may explain the  
47  
48 concurrence of psoriasis and AITD. The predominant Th1 immune reaction has been  
49  
50 observed in patients with psoriasis,<sup>27 28</sup> such as Th1 infiltration in involved tissues,  
51  
52 and high serum levels of Th1-prototype chemokines and cytokines (TNF- $\alpha$ , IFN- $\gamma$ ,  
53  
54 and CXCL10), all of which are present in AITD.<sup>29-32</sup> Additionally, Th17-mediated  
55  
56  
57  
58  
59  
60

1  
2  
3  
4 immune disorder has also been observed in psoriasis and AITD.<sup>33 34</sup> The two diseases  
5  
6 share several predisposing genetic alleles or regions. For example, the genetic data  
7  
8 from 265 families with two or more autoimmune disorders have shown that the  
9  
10 PTPN22-R620W allele has a remarkable association with HT and a mild association  
11  
12 with psoriasis.<sup>35</sup> Additionally, other SNP variations in the PTPN22 gene have been  
13  
14 demonstrated to be indicators for evaluating the risk of psoriasis.<sup>36 37</sup> IL12B has been  
15  
16 generally recognized as a psoriasis susceptibility gene,<sup>38</sup> an upstream variation of  
17  
18 which affects the phenotype of AITD in men.<sup>39</sup>

### 24 **Implications for practice**

25  
26  
27 Owing to no access to the information on drug application not provided by  
28  
29 original researches, drug exposure may be a source of residual confounding in the  
30  
31 present study and a potential risk factor for concurrence of psoriasis and AITD, apart  
32  
33 from the reasons mentioned above.  $\beta$ -blocker, used to control thyrotoxicosis-related  
34  
35 symptoms, has been implicated in induction or exacerbation of psoriasis.<sup>40 41</sup> In  
36  
37 addition, it has been reported that the administration of acitretin, a common drug for  
38  
39 the treatment of psoriasis, can lead to the reduction of free T4 (thyroid hormone)  
40  
41 levels in patients with psoriasis.<sup>17</sup> Therefore, once the patients develop suspicious  
42  
43 symptoms after these treatments, diagnostic investigation and intervention should be  
44  
45 considered as early as possible to avoid the exacerbation. On the other hand, the  
46  
47 treatment for AITD and psoriasis can be mutually beneficial. For example,  
48  
49 propylthiouracil (PTU), a drug used to inhibit thyroid hormone synthesis, has been  
50  
51 effective in the treatment of psoriasis.<sup>42</sup> Based on the above findings, it is  
52  
53  
54  
55  
56  
57  
58  
59  
60

1  
2  
3  
4 recommended that the treatment options be adjusted once patients with psoriasis are  
5  
6 diagnosed with comorbid AITD.  
7  
8

### 9 **Limitations**

10  
11 There are several limitations to this meta-analysis. First, the meta-analysis  
12 included studies with different study designs. Given this, we conducted a subgroup  
13 analysis of each study design, which also showed that the patients with psoriasis had  
14 an increased prevalence of AITD in the cross-sectional study strata and the  
15 case-control study strata. Second, there is considerable heterogeneity in the present  
16 study. Subgroup analysis and meta-regression analysis helped us to identify the  
17 potential sources of the heterogeneity. However, there are likely to be other unknown  
18 reasons responsible for the heterogeneity. Thirdly, the lack of information on drug  
19 application made drug exposure a confounding factor. Therefore, further large-scale  
20 and high-quality prospective studies are still required to validate our findings.  
21  
22  
23  
24  
25  
26  
27  
28  
29  
30  
31  
32  
33  
34  
35  
36

### 37 **CONCLUSIONS**

38  
39 The present meta-analysis revealed that AITD was more prevalent in patients  
40 with psoriasis than in the general population, especially loss-of-function disorder of  
41 the thyroid gland. Moreover, patients with psoriasis were found to have elevated  
42 positive rates of TPOAb and TgAb compared to the control individuals. Accordingly,  
43 we recommend that every dermatologist be conscious of this association and suggest  
44 necessary examinations and intervention be considered as soon as possible when  
45 patients with psoriasis have suspicious AITD-related symptoms.  
46  
47  
48  
49  
50  
51  
52  
53  
54  
55  
56

57  
58 **Contributors** XZ and SZ carried out the extraction of reference data, meta-analysis,  
59  
60



1  
2  
3  
4 and wrote manuscripts, RW and PZ supported and assisted the manuscripts, YS and  
5  
6  
7 SL reviewed and suggested the manuscripts. All authors were involved in finalizing  
8  
9 the manuscript.  
10

## 11 **Funding**

12  
13  
14 This work was supported by grants from the National Natural Science Foundation  
15  
16 of China (No. 81872534 to Yuwen Su) and the Fundamental Research Funds for the  
17  
18 Central Universities of Central South University (No. 2019zzts905).  
19  
20  
21

22 **Competing interests** None declared.  
23

24 **Patient consent for publication** Not required.  
25

26 **Ethics approval** As this is a meta-analysis ethics approval was not required.  
27  
28

29 **Provenance and peer review** Not commissioned; externally peer reviewed.  
30  
31

32 **Data availability statement** All data relevant to the study are included in the article.  
33  
34

35 **Acknowledgments** Not required.  
36  
37

## 38 **ORCID iD**

39  
40 Yuwen Su <https://orcid.org/0000-0001-9918-1830>  
41  
42  
43  
44  
45  
46  
47  
48  
49  
50  
51  
52  
53  
54  
55  
56  
57  
58  
59  
60

## Reference

1. Griffiths CEM, Van Der Walt JM, Ashcroft DM, *et al.* The global state of psoriasis disease epidemiology: a workshop report. *Br J Dermatol* 2017;177(1):e4-e7.
2. Langley RG, Krueger GG, Griffiths CE. Psoriasis: epidemiology, clinical features, and quality of life. *Ann Rheum Dis* 2005;64 Suppl 2:ii18-23; discussion ii24-5.
3. Dauden E, Castaneda S, Suarez C, *et al.* Clinical practice guideline for an integrated approach to comorbidity in patients with psoriasis. *J Eur Acad Dermatol Venereol* 2013;27(11):1387-404.
4. Schaefer CP, Cappelleri JC, Cheng R, *et al.* Health care resource use, productivity, and costs among patients with moderate to severe plaque psoriasis in the United States. *J Am Acad Dermatol* 2015;73(4):585-93.e3.
5. Kaushik SB, Lebwohl MG. Psoriasis: Which therapy for which patient: Psoriasis comorbidities and preferred systemic agents. *J Am Acad Dermatol* 2019;80(1):27-40.
6. Antonelli A, Ferrari SM, Corrado A, *et al.* Autoimmune thyroid disorders. *Autoimmun Rev* 2015;14(2):174-80.
7. Hesarghatta Shyamasunder A, Abraham P. Measuring TSH receptor antibody to influence treatment choices in Graves' disease. *Clin Endocrinol (Oxf)* 2017;86(5):652-57.
8. Antonelli A, Delle Sedie A, Fallahi P, *et al.* High prevalence of thyroid autoimmunity and hypothyroidism in patients with psoriatic arthritis. *J Rheumatol* 2006;33(10):2026-8.
9. Tsai TF, Wang TS, Hung ST, *et al.* Epidemiology and comorbidities of psoriasis patients in a national database in Taiwan. *J Dermatol Sci* 2011;63(1):40-6.
10. Alidrisi HA, Al Hamdi K, Mansour AA. Is There Any Association Between Psoriasis and Hashimoto's Thyroiditis? *Cureus* 2019;11(3):e4269.
11. Fallahi P, Ferrari SM, Ruffilli I, *et al.* Increased incidence of autoimmune thyroid disorders in patients with psoriatic arthritis: a longitudinal follow-up study. *Immunol Res* 2017;65(3):681-86.
12. Haddad A, Ashkenazi RI, Bitterman H, *et al.* Endocrine Comorbidities in Patients with Psoriatic Arthritis: A Population-based Case-controlled Study. *J Rheumatol* 2017;44(6):786-90.
13. Kiguradze T, Bruins FM, Guido N, *et al.* Evidence for the association of Hashimoto's thyroiditis with psoriasis: a cross-sectional retrospective study. *Int J Dermatol* 2017;56(5):553-56.
14. Valduga JaG, Rebeiko LB, Skare TL. Prevalence of Hashimoto's thyroiditis in psoriasis patients. *Rev Assoc Med Bras (1992)* 2021;67(1):52-57.
15. Vassilatou E, Papadavid E, Papastamatakis P, *et al.* No association of psoriasis with autoimmune thyroiditis. *J Eur Acad Dermatol Venereol* 2017;31(1):102-06.
16. Wang SH, Wang J, Lin YS, *et al.* Increased risk for incident thyroid diseases in people with psoriatic disease: A cohort study. *J Am Acad Dermatol* 2019;80(4):1006-12.
17. Karadag AS, Ozlu E, Kostek O, *et al.* Effect of low-dose acitretin treatment on pituitary hormones in psoriasis vulgaris: A retrospective study. *Indian J Dermatol Venereol Leprol* 2019;85(3):300-04.
18. Wells. G, Shea. B, O'connell. D, *et al.* The Newcastle-Ottawa Scale (NOS) for assessing the quality of nonrandomised studies in Newcastle-analyses. 11th November 2021 2019. [http://www.ohri.ca/programs/clinical\\_epidemiology/oxford.asp](http://www.ohri.ca/programs/clinical_epidemiology/oxford.asp).
19. Rostom. A, Dubé. C, Cranney. A, *et al.* AHRQ Evidence Reports. 11th November 2021 2004. <https://www.ncbi.nlm.nih.gov/books/NBK35156/>.
20. Sterne JA, Hernán MA, Reeves BC, *et al.* ROBINS-I: a tool for assessing risk of bias in

- 1  
2  
3 non-randomised studies of interventions. *BMJ (Clinical research ed)* 2016;355:i4919.
- 4  
5 21. Peluso R, Lupoli GA, Del Puente A, *et al.* Prevalence of thyroid autoimmunity in patients with  
6 spondyloarthropathies. *J Rheumatol* 2011;38(7):1371-7.
- 7  
8 22. Wu JJ, Nguyen TU, Poon KY, *et al.* The association of psoriasis with autoimmune diseases. *J Am*  
9 *Acad Dermatol* 2012;67(5):924-30.
- 10  
11 23. Vastarella M, Megna M, Lupoli GA, *et al.* Is there any association between psoriasis, psoriatic  
12 arthritis and thyroid autoimmunity? *Australas J Dermatol* 2020.
- 13  
14 24. Khan SR, Bano A, Wakkee M, *et al.* The association of autoimmune thyroid disease (AITD) with  
15 psoriatic disease: a prospective cohort study, systematic review and meta-analysis. *Eur J*  
16 *Endocrinol* 2017;177(4):347-59.
- 17  
18 25. Perera GK, Di Meglio P, Nestle FO. Psoriasis. *Annual review of pathology* 2012;7:385-422.
- 19  
20 26. Simmonds MJ. GWAS in autoimmune thyroid disease: redefining our understanding of  
21 pathogenesis. *Nature reviews Endocrinology* 2013;9(5):277-87.
- 22  
23 27. Cai Y, Fleming C, Yan J. New insights of T cells in the pathogenesis of psoriasis. *Cell Mol Immunol*  
24 2012;9(4):302-9.
- 25  
26 28. Lowes MA, Suarez-Farinas M, Krueger JG. Immunology of psoriasis. *Annu Rev Immunol*  
27 2014;32:227-55.
- 28  
29 29. Antonelli A, Ferrari SM, Giuggioli D, *et al.* Chemokine (C-X-C motif) ligand (CXCL)10 in autoimmune  
30 diseases. *Autoimmun Rev* 2014;13(3):272-80.
- 31  
32 30. Ruffilli I, Ragusa F, Benvenga S, *et al.* Psoriasis, Psoriatic Arthritis, and Thyroid Autoimmunity.  
33 *Front Endocrinol (Lausanne)* 2017;8:139.
- 34  
35 31. Nanba T, Watanabe M, Inoue N, *et al.* Increases of the Th1/Th2 cell ratio in severe Hashimoto's  
36 disease and in the proportion of Th17 cells in intractable Graves' disease. *Thyroid*  
37 2009;19(5):495-501.
- 38  
39 32. Peng S, Li C, Wang X, *et al.* Increased Toll-Like Receptors Activity and TLR Ligands in Patients with  
40 Autoimmune Thyroid Diseases. *Front Immunol* 2016;7:578.
- 41  
42 33. Hansel A, Gunther C, Ingwersen J, *et al.* Human slan (6-sulfo LacNAc) dendritic cells are  
43 inflammatory dermal dendritic cells in psoriasis and drive strong TH17/TH1 T-cell responses. *J*  
44 *Allergy Clin Immunol* 2011;127(3):787-94.e1-9.
- 45  
46 34. Vitales-Noyola M, Ramos-Levi AM, Martinez-Hernandez R, *et al.* Pathogenic Th17 and Th22 cells  
47 are increased in patients with autoimmune thyroid disorders. *Endocrine* 2017;57(3):409-17.
- 48  
49 35. Criswell LA, Pfeiffer KA, Lum RF, *et al.* Analysis of families in the multiple autoimmune disease  
50 genetics consortium (MADGC) collection: the PTPN22 620W allele associates with multiple  
51 autoimmune phenotypes. *Am J Hum Genet* 2005;76(4):561-71.
- 52  
53 36. Li Y, Liao W, Chang M, *et al.* Further genetic evidence for three psoriasis-risk genes: ADAM33,  
54 CDKAL1, and PTPN22. *J Invest Dermatol* 2009;129(3):629-34.
- 55  
56 37. Wang H, Wang Z, Rani PL, *et al.* Identification of PTPN22, ST6GAL1 and JAZF1 as psoriasis risk  
57 genes demonstrates shared pathogenesis between psoriasis and diabetes. *Exp Dermatol*  
58 2017;26(11):1112-17.
- 59  
60 38. Cargill M, Schrodi SJ, Chang M, *et al.* A large-scale genetic association study confirms IL12B and  
leads to the identification of IL23R as psoriasis-risk genes. *Am J Hum Genet* 2007;80(2):273-90.
39. Walsh JP, Berry J, Liu S, *et al.* The clinical presentation of autoimmune thyroid disease in men is  
associated with IL12B genotype. *Clin Endocrinol (Oxf)* 2011;74(4):508-12.
40. Balak DM, Hajdarbegovic E. Drug-induced psoriasis: clinical perspectives. *Psoriasis (Auckl)*

1  
2  
3 2017;7:87-94.

4 41. Mcdermott MT. Hyperthyroidism. *Annals of internal medicine* 2020;172(7):ITC49-ITC64.

5  
6 42. Gnanaraj P, Malligarjunan H, Dayalan H, *et al.* Therapeutic efficacy and safety of propylthiouracil  
7 in psoriasis: an open-label study. *Indian J Dermatol Venereol Leprol* 2011;77(6):673-6.  
8  
9

10  
11  
12 **Figure legend:**

13  
14 Figure 1 Flowchart for study screening

15  
16  
17 Figure 2 Forest plot of the association between psoriasis and autoimmune thyroid  
18 disease  
19

20  
21  
22 Figure 3 Sensitivity analysis and publication bias

23  
24  
25 Figure 4 A: Forest plots of psoriasis and hypothyroidism B: Forest plots of psoriasis  
26 and hyperthyroidism C: Forest plots of psoriasis and HT  
27

28  
29  
30 Figure 5 A: Forest plots of psoriasis and GD B: Forest plots of psoriasis and TgAb C:  
31 Forest plots of psoriasis and TPOAb  
32  
33  
34  
35  
36  
37  
38  
39  
40  
41  
42  
43  
44  
45  
46  
47  
48  
49  
50  
51  
52  
53  
54  
55  
56  
57  
58  
59  
60

| Database | Retrieval strategy                                                                                                                                                                                                                                                                                                                                                                                                                                                          |
|----------|-----------------------------------------------------------------------------------------------------------------------------------------------------------------------------------------------------------------------------------------------------------------------------------------------------------------------------------------------------------------------------------------------------------------------------------------------------------------------------|
| PubMed   | ((((((((((Thyroid[Title/Abstract]) OR (Thyroiditis[Title/Abstract])) OR (Hashimoto Thyroiditis[Title/Abstract])) OR (Graves Disease[Title/Abstract])) OR (Hyperthyroidism[Title/Abstract])) OR (Hypothyroidism[Title/Abstract])) OR (TgAb[Title/Abstract])) OR (TPOAb[Title/Abstract])) OR (TRAb[Title/Abstract])) OR (Endocrine Comorbidities[Title/Abstract])) OR (Autoimmune diseases[Title/Abstract])) AND ((psoriasis[Title/Abstract]) OR (psoriatic[Title/Abstract])) |
| Embase   | (thyroid:ab,ti OR thyroiditis:ab,ti OR 'hashimoto thyroiditis':ab,ti OR 'graves disease':ab,ti OR hyperthyroidism:ab,ti OR hypothyroidism:ab,ti OR tgab:ab,ti OR tpoab:ab,ti OR trab:ab,ti OR 'endocrine comorbidities':ab,ti OR 'autoimmune diseases':ab,ti) AND (psoriasis:ab,ti OR psoriatic:ab,ti)                                                                                                                                                                      |
| Scopus   | (( TITLE-ABS-KEY ( thyroiditis ) OR TITLE-ABS-KEY ( hashimoto AND thyroiditis ) OR TITLE-ABS-KEY ( graves AND disease ) OR TITLE-ABS-KEY ( hyperthyroidism ) OR TITLE-ABS-KEY ( hypothyroidism ) OR TITLE-ABS-KEY ( tgab ) OR TITLE-ABS-KEY ( tpoab ) OR TITLE-ABS-KEY ( trab ) )) AND ( TITLE-ABS-KEY ( psoriasis ) OR TITLE-ABS-KEY ( psoriatic ) )                                                                                                                       |
| Cochrane | (((Psoriasis) OR psoriatic) OR Pustulosis of Palms) AND (((((((Thyroid) OR Thyroiditis) OR Thyroiditides) OR Hashimoto Disease) OR Graves Disease) OR Hyperthyroidism) OR Hypothyroidism)). And chose literature published up to "2021/11/01". Then chose "Trials"                                                                                                                                                                                                          |

**Table 1** Database source and retrieval strategy.

TPOAb: Thyroid peroxidase antibody; TgAb: Thyroglobulin antibody; TRAb: Thyroid stimulating hormone receptor antibody.

| Study<br>(Author)           | Year | Country  | Study<br>design     | No. Patients | No. Controls | Patients, %<br>Female | Patients,<br>mean age |
|-----------------------------|------|----------|---------------------|--------------|--------------|-----------------------|-----------------------|
| Antonelli <i>et al.</i>     | 2006 | Italy    | Case-cont<br>rol    | 80           | 400          | 45                    | 57                    |
| Tsai <i>et al.</i>          | 2011 | China    | Case-cont<br>rol    | 51800        | 207200       | 38.5                  | 46.4                  |
| Peluso <i>et al.</i>        | 2011 | Italy    | Case-cont<br>rol    | 108          | 318          | 52.8                  | 39.9                  |
| Wu <i>et al.</i>            | 2012 | American | Case-cont<br>rol    | 25341        | 126705       | 48.4                  | 48.9                  |
| Vassilatou<br><i>et al.</i> | 2017 | Greece   | Case-cont<br>rol    | 114          | 286          | 49.1                  | 52.7                  |
| Kiguradze<br><i>et al.</i>  | 2017 | Greece   | Cross-sect<br>ional | 9654         | 846961       | NA                    | NA                    |
| Haddad <i>et al.</i>        | 2017 | Israel   | Case-cont<br>rol    | 3161         | 31610        | 53.4                  | 58.4                  |
| Fallahi <i>et al.</i>       | 2017 | Italy    | Cohort              | 97           | 97           | 47.4                  | 56                    |
| Alidrisi <i>et al.</i>      | 2019 | Iraq     | Case-cont<br>rol    | 56           | 54           | 58.9                  | 43.05                 |
| Wang <i>et al.</i>          | 2019 | China    | Cohort              | 162842       | 162842       | 45.5                  | 45                    |
| Valduga <i>et al.</i>       | 2021 | Valduga  | Case-cont<br>rol    | 60           | 60           | 66.7                  | 54.5                  |

**Table 2** Characteristics of the included studies

| Study (Author)           | Definition of psoriasis                                                     | Definition of AITD                                                                                                               | NOS score |
|--------------------------|-----------------------------------------------------------------------------|----------------------------------------------------------------------------------------------------------------------------------|-----------|
| Antonelli <i>et al.</i>  | The criteria of Vasey and Espinoza                                          | Serum levels of thyroid stimulating hormone and TgAb and TPOAb                                                                   | 7         |
| Tsai <i>et al.</i>       | ICD-9-CM code 696.0                                                         | ICD-9-CM codes 242.9x, 244.9x                                                                                                    | 6         |
| Peluso <i>et al.</i>     | Classification of Psoriatic Arthritis study group criteria                  | Serum levels of TgAb > 115 IU/mL or TPOAb > 34 IU/mL, and Thyroid ultrasonography                                                | 7         |
| Wu <i>et al.</i>         | ICD-9-CM code 696.0                                                         | ICD-9-CM codes 242.0, 245.2                                                                                                      | 7         |
| Vassilatou <i>et al.</i> | Moll and Wright criteria                                                    | Serum levels of TgAb > 115 IU/mL or TPOAb > 34 IU/mL                                                                             | 7         |
| Kiguradze <i>et al.</i>  | ICD-9-CM code 696.0                                                         | ICD-9-CM codes 245.2                                                                                                             | 6*        |
| Haddad <i>et al.</i>     | Clinical diagnosis from Clalit Health Services                              | Clinical diagnosis from Clalit Health Services                                                                                   | 6         |
| Fallahi <i>et al.</i>    | Criteria of Vasey and Espinoza                                              | Serum levels of TgAb or TPOAb > 100 IU/mL                                                                                        | 6         |
| Alidrisi <i>et al.</i>   | Clinical diagnosis from Endocrine and Metabolism Center                     | Serum levels of TgAb > 115 IU/mL or TPOAb > 34 IU/mL                                                                             | 6         |
| Wang <i>et al.</i>       | ICD-9-CM code 696.0                                                         | ICD-9-CM code 242, 242.0, 244, 246                                                                                               | 8         |
| Valduga <i>et al.</i>    | Clinical diagnosis and measured by Psoriasis Area and Severity Index (PASI) | Hypothyroidism was detected, or when they need for thyroid hormone replacement therapy or positive of TPOAb with or without TgAb | 6         |

**Table 3** Characteristics of the included studies (2)

\*This was a score based on the AHRQ evaluation.

1  
2  
3  
4  
5  
6  
7  
8  
9  
10  
11  
12  
13  
14  
15  
16  
17  
18  
19  
20  
21  
22  
23  
24  
25  
26  
27  
28  
29  
30  
31  
32  
33  
34  
35  
36  
37  
38  
39  
40  
41  
42  
43  
44  
45  
46

ICD-9-CM: The International Classification of Diseases, Ninth Revision, Clinical Modification

For peer review only



1  
2  
3  
4  
5  
6  
7  
8  
9  
10  
11  
12  
13  
14  
15  
16  
17  
18  
19  
20  
21  
22  
23  
24  
25  
26  
27  
28  
29  
30  
31  
32  
33  
34  
35  
36  
37  
38  
39  
40  
41  
42  
43  
44  
45  
46

| Study(Author)            | Year | Bias due to confounding | Bias in selection of participants into the study | Bias in classification of interventions | Bias due to deviations from intended interventions | Bias due to missing data | Bias in measurement of outcomes | Bias in selection of the reported result | Overall bias  |
|--------------------------|------|-------------------------|--------------------------------------------------|-----------------------------------------|----------------------------------------------------|--------------------------|---------------------------------|------------------------------------------|---------------|
| Antonelli <i>et al.</i>  | 2006 | Moderate risk           | Low risk                                         | Low risk                                | Moderate risk                                      | Low risk                 | Low risk                        | Low risk                                 | Moderate risk |
| Tsai <i>et al.</i>       | 2011 | Moderate risk           | Low risk                                         | Low risk                                | Moderate risk                                      | Low risk                 | Low risk                        | Low risk                                 | Moderate risk |
| Peluso <i>et al.</i>     | 2011 | Moderate risk           | Low risk                                         | Low risk                                | Moderate risk                                      | Low risk                 | Low risk                        | Low risk                                 | Moderate risk |
| Wu <i>et al.</i>         | 2012 | Moderate risk           | Low risk                                         | Low risk                                | Moderate risk                                      | Low risk                 | Low risk                        | Moderate risk                            | Moderate risk |
| Vassilatou <i>et al.</i> | 2017 | Moderate risk           | Low risk                                         | Low risk                                | Low risk                                           | Low risk                 | Low risk                        | Low risk                                 | Moderate risk |
| Kiguradze <i>et al.</i>  | 2017 | Moderate risk           | Low risk                                         | Low risk                                | Moderate risk                                      | Low risk                 | Low risk                        | Moderate risk                            | Moderate risk |
| Haddad <i>et al.</i>     | 2017 | Moderate risk           | Low risk                                         | Low risk                                | Moderate risk                                      | Low risk                 | Low risk                        | Low risk                                 | Moderate risk |
| Fallahi <i>et al.</i>    | 2017 | Moderate risk           | Low risk                                         | Low risk                                | Moderate risk                                      | Low risk                 | Low risk                        | Low risk                                 | Moderate risk |
| Alidrisi <i>et al.</i>   | 2019 | Moderate risk           | Low risk                                         | Low risk                                | Moderate risk                                      | Low risk                 | Low risk                        | Low risk                                 | Moderate risk |
| Wang <i>et al.</i>       | 2019 | Moderate risk           | Low risk                                         | Low risk                                | Moderate risk                                      | Low risk                 | Low risk                        | Low risk                                 | Moderate risk |
| Valduga <i>et al.</i>    | 2021 | Moderate risk           | Low risk                                         | Low risk                                | Moderate risk                                      | Low risk                 | Low risk                        | Moderate risk                            | Moderate risk |

**Table 4** Risk of bias for the 11 included studies based on the ROBINS-I tool

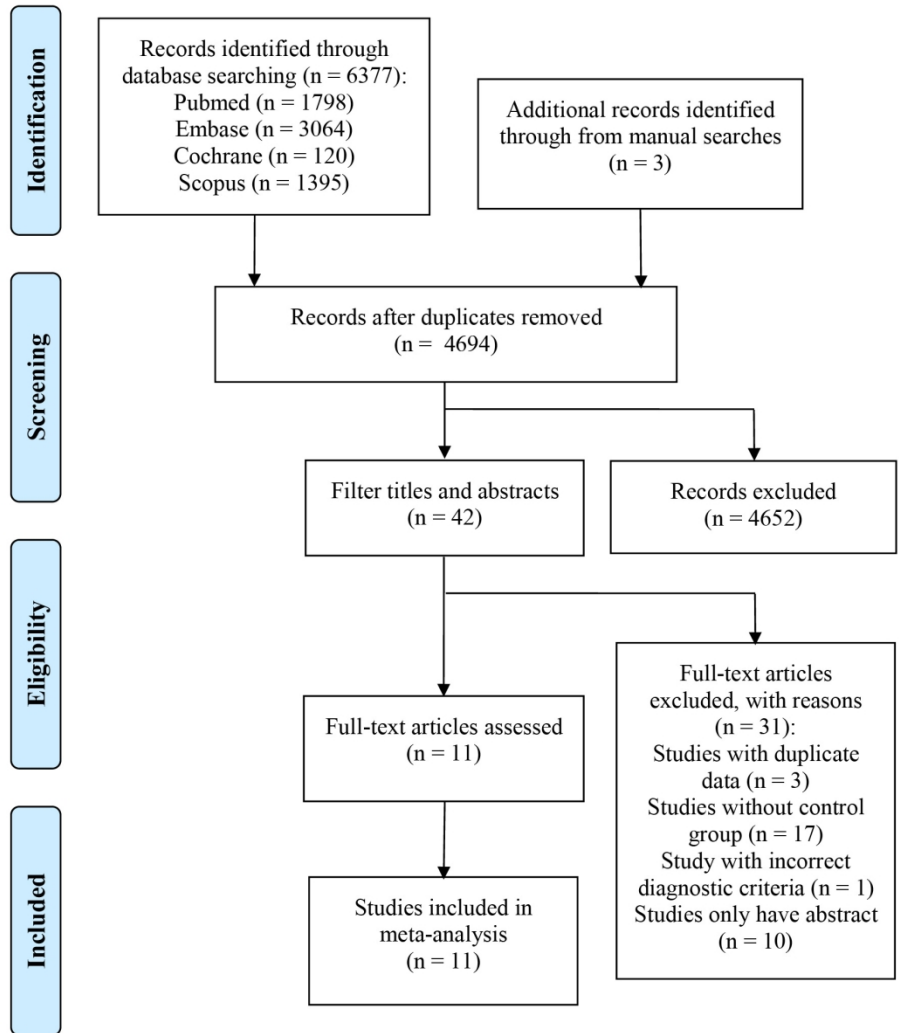

Figure 1 Flowchart for study screening

164x200mm (300 x 300 DPI)

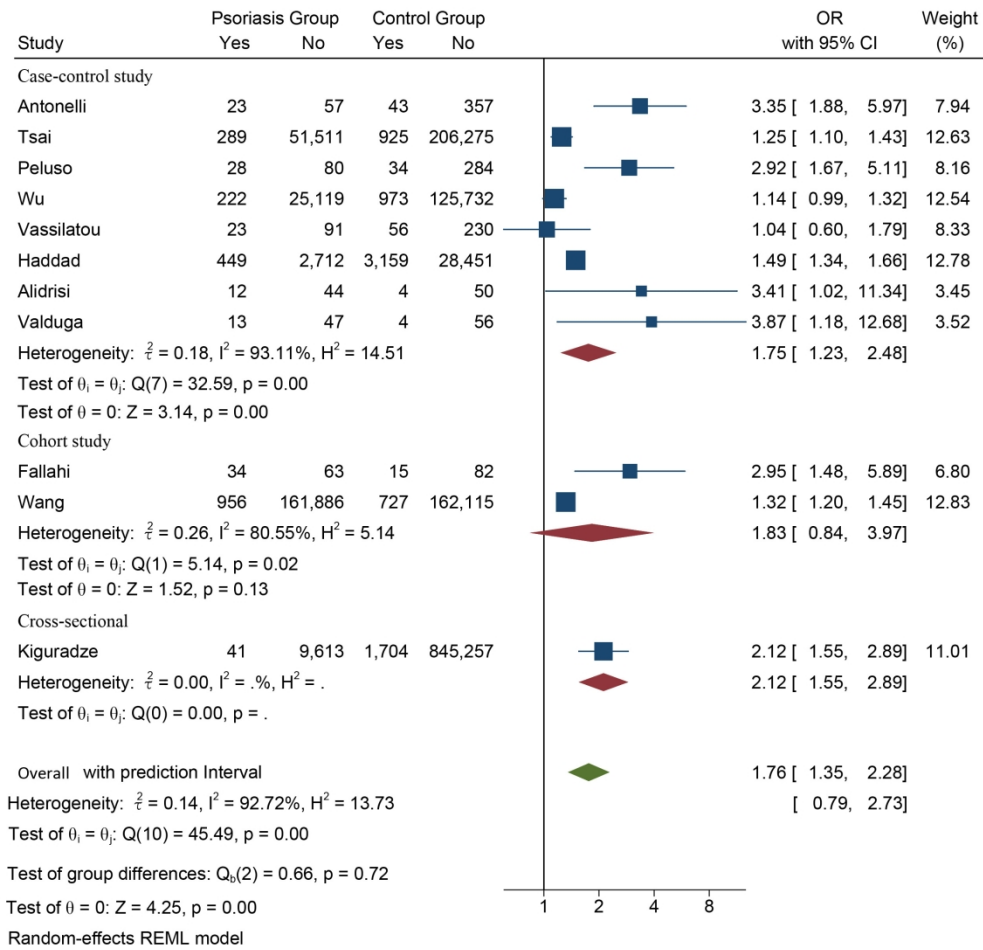

Figure 2 Forest plot of the association between psoriasis and autoimmune thyroid disease

215x206mm (300 x 300 DPI)

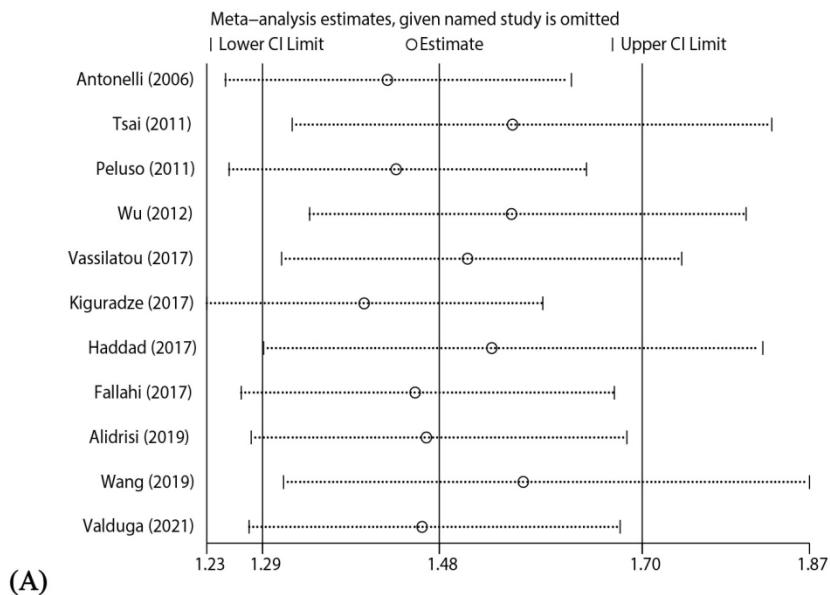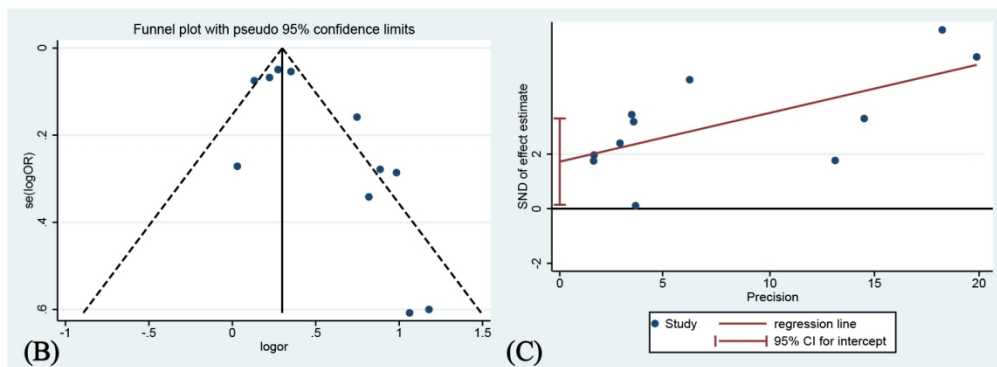

Figure 3 Sensitivity analysis and publication bias

141x138mm (300 x 300 DPI)

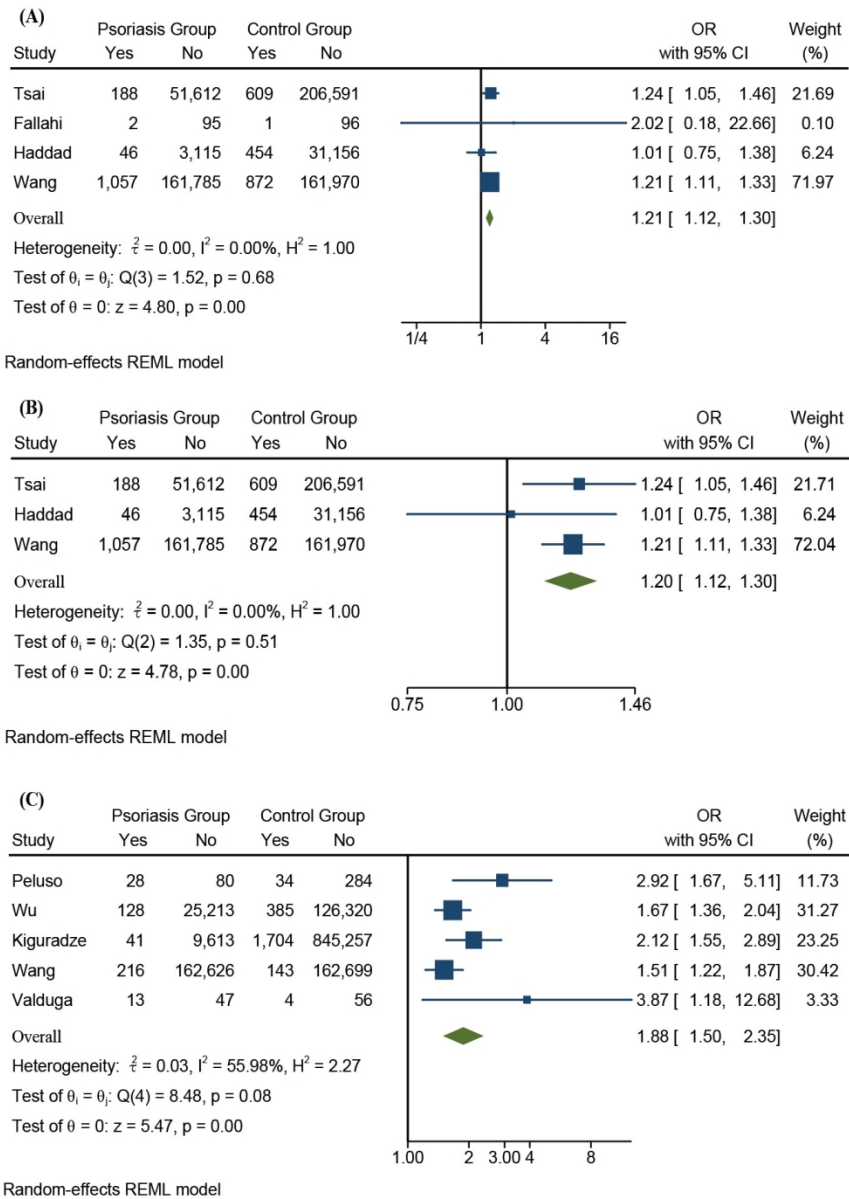

Figure 4 A: Forest plots of psoriasis and hypothyroidism B: Forest plots of psoriasis and hyperthyroidism C: Forest plots of psoriasis and HT

117x162mm (300 x 300 DPI)

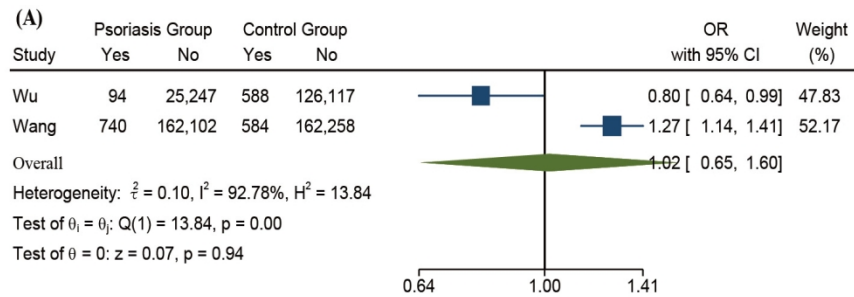

Random-effects REML model

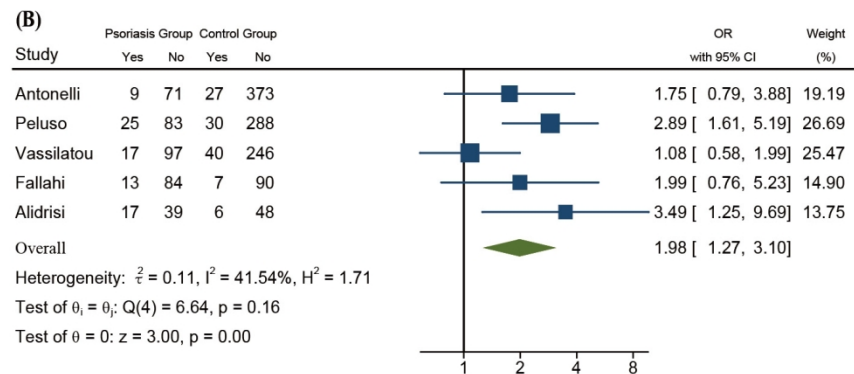

Random-effects REML model

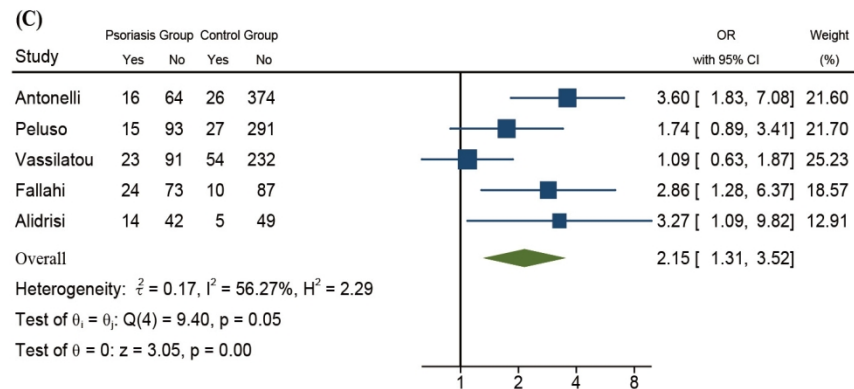

Random-effects REML model

Figure 5 A: Forest plots of psoriasis and GD B: Forest plots of psoriasis and TgAb C: Forest plots of psoriasis and TPOAb

123x169mm (300 x 300 DPI)

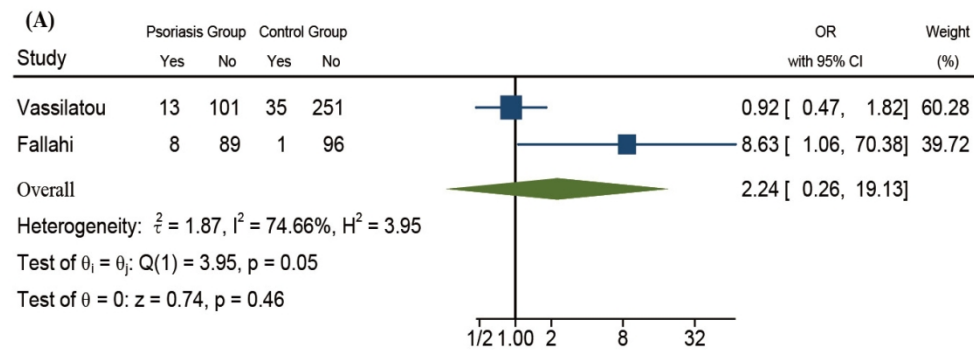

Random-effects REML model

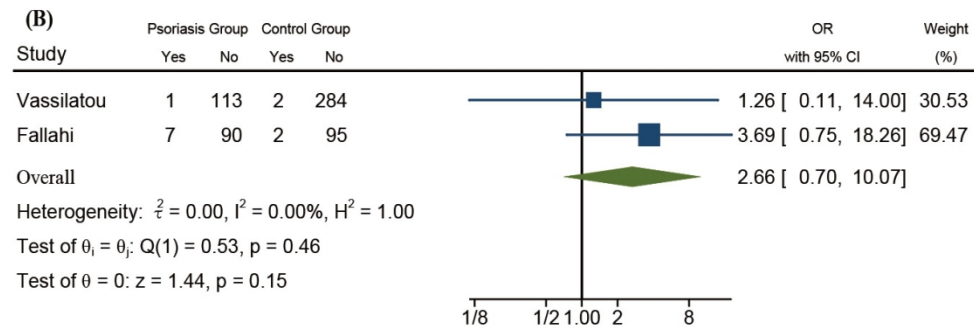

Random-effects REML model

117x97mm (300 x 300 DPI)



## PRISMA 2020 Checklist

| Section and Topic             | Item # | Checklist item                                                                                                                                                                                                                                                                                       | Location where item is reported |
|-------------------------------|--------|------------------------------------------------------------------------------------------------------------------------------------------------------------------------------------------------------------------------------------------------------------------------------------------------------|---------------------------------|
| <b>TITLE</b>                  |        |                                                                                                                                                                                                                                                                                                      |                                 |
| Title                         | 1      | Identify the report as a meta-analysis.                                                                                                                                                                                                                                                              | 1                               |
| <b>ABSTRACT</b>               |        |                                                                                                                                                                                                                                                                                                      |                                 |
| Abstract                      | 2      | The abstract included Objective, Design, Data sources, Eligibility criteria for selecting studies, Data extraction and synthesis, Results, Conclusions, PROSPERO registration number .                                                                                                               | 2                               |
| <b>INTRODUCTION</b>           |        |                                                                                                                                                                                                                                                                                                      |                                 |
| Rationale                     | 3      | Describe the rationale for the review in the context of existing knowledge.                                                                                                                                                                                                                          | 4                               |
| Objectives                    | 4      | Provide an explicit statement of the objective the review addresses.                                                                                                                                                                                                                                 | 5                               |
| <b>METHODS</b>                |        |                                                                                                                                                                                                                                                                                                      |                                 |
| Eligibility criteria          | 5      | Specify the inclusion and exclusion criteria for the review and how studies were grouped for the syntheses.                                                                                                                                                                                          | 5                               |
| Information sources           | 6      | Specify all databases, registers, websites, organisations, reference lists and other sources searched or consulted to identify studies. Specify the date when each source was last searched or consulted.                                                                                            | 5, Table 1                      |
| Search strategy               | 7      | Present the full search strategies for all databases, registers and websites, including any filters and limits used.                                                                                                                                                                                 | Table 1                         |
| Selection process             | 8      | Specify the methods used to decide whether a study met the inclusion criteria of the review, including how many reviewers screened each record and each report retrieved, whether they worked independently, and if applicable, details of automation tools used in the process.                     | 6                               |
| Data collection process       | 9      | Specify the methods used to collect data from reports, including how many reviewers collected data from each report, whether they worked independently, any processes for obtaining or confirming data from study investigators, and if applicable, details of automation tools used in the process. | 6                               |
| Data items                    | 10a    | List and define all outcomes for which data were sought. Specify whether all results that were compatible with each outcome domain in each study were sought (e.g. for all measures, time points, analyses), and if not, the methods used to decide which results to collect.                        | 6                               |
|                               | 10b    | List and define all other variables for which data were sought (e.g. participant and intervention characteristics, funding sources). Describe any assumptions made about any missing or unclear information.                                                                                         | 6                               |
| Study risk of bias assessment | 11     | Specify the methods used to assess risk of bias in the included studies, including details of the tool(s) used, how many reviewers assessed each study and whether they worked independently, and if applicable, details of automation tools used in the process.                                    | 6                               |
| Effect measures               | 12     | Specify for each outcome the effect measure(s) (e.g. risk ratio, mean difference) used in the synthesis or presentation of results.                                                                                                                                                                  | 7                               |
| Synthesis methods             | 13a    | Describe the processes used to decide which studies were eligible for each synthesis (e.g. tabulating the study intervention characteristics and comparing against the planned groups for each synthesis (item #5)).                                                                                 | 7, Figure 1                     |
|                               | 13b    | Describe any methods required to prepare the data for presentation or synthesis, such as handling of missing summary statistics, or data conversions.                                                                                                                                                | 6                               |
|                               | 13c    | Describe any methods used to tabulate or visually display results of individual studies and syntheses.                                                                                                                                                                                               | 7                               |
|                               | 13d    | Describe any methods used to synthesize results and provide a rationale for the choice(s). If meta-analysis was performed, describe the model(s), method(s) to identify the presence and extent of statistical heterogeneity, and software package(s) used.                                          | 6                               |
|                               | 13e    | Describe any methods used to explore possible causes of heterogeneity among study results (e.g. subgroup analysis, meta-regression).                                                                                                                                                                 | 7, 8                            |
|                               | 13f    | Describe any sensitivity analyses conducted to assess robustness of the synthesized results.                                                                                                                                                                                                         | 7                               |
| Reporting bias assessment     | 14     | Describe any methods used to assess risk of bias due to missing results in a synthesis (arising from reporting biases).                                                                                                                                                                              | 6                               |
| Certainty                     | 15     | Describe any methods used to assess certainty (or confidence) in the body of evidence for an outcome.                                                                                                                                                                                                | 6                               |



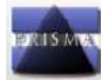

## PRISMA 2020 Checklist

| Section and Topic                              | Item # | Checklist item                                                                                                                                                                                                                                                                       | Location where item is reported |
|------------------------------------------------|--------|--------------------------------------------------------------------------------------------------------------------------------------------------------------------------------------------------------------------------------------------------------------------------------------|---------------------------------|
| assessment                                     |        |                                                                                                                                                                                                                                                                                      |                                 |
| <b>RESULTS</b>                                 |        |                                                                                                                                                                                                                                                                                      |                                 |
| Study selection                                | 16a    | Describe the results of the search and selection process, from the number of records identified in the search to the number of studies included in the review, ideally using a flow diagram.                                                                                         | Figure 1                        |
|                                                | 16b    | Cite studies that might appear to meet the inclusion criteria, but which were excluded, and explain why they were excluded.                                                                                                                                                          | Figure 1                        |
| Study characteristics                          | 17     | Cite each included study and present its characteristics.                                                                                                                                                                                                                            | Table 2                         |
| Risk of bias in studies                        | 18     | Present assessments of risk of bias for each included study.                                                                                                                                                                                                                         | Table 4                         |
| Results of individual studies                  | 19     | For all outcomes, present, for each study: (a) summary statistics for each group (where appropriate) and (b) an effect estimate and its precision (e.g. confidence/credible interval), ideally using structured tables or plots.                                                     | Figure 2-5                      |
| Results of syntheses                           | 20a    | For each synthesis, briefly summarise the characteristics and risk of bias among contributing studies.                                                                                                                                                                               | 8                               |
|                                                | 20b    | Present results of all statistical syntheses conducted. If meta-analysis was done, present for each the summary estimate and its precision (e.g. confidence/credible interval) and measures of statistical heterogeneity. If comparing groups, describe the direction of the effect. | 8,10,11                         |
|                                                | 20c    | Present results of all investigations of possible causes of heterogeneity among study results.                                                                                                                                                                                       | 8-9                             |
|                                                | 20d    | Present results of all sensitivity analyses conducted to assess the robustness of the synthesized results.                                                                                                                                                                           | Figure 3                        |
| Reporting biases                               | 21     | Present assessments of risk of bias due to missing results (arising from reporting biases) for each synthesis assessed.                                                                                                                                                              | Figure 3                        |
| Certainty of evidence                          | 22     | Present assessments of certainty (or confidence) in the body of evidence for each outcome assessed.                                                                                                                                                                                  | Figure 2                        |
| <b>DISCUSSION</b>                              |        |                                                                                                                                                                                                                                                                                      |                                 |
| Discussion                                     | 23a    | Provide a general interpretation of the results in the context of other evidence.                                                                                                                                                                                                    | 13,14                           |
|                                                | 23b    | Discuss any limitations of the evidence included in the review.                                                                                                                                                                                                                      | 15                              |
|                                                | 23c    | Discuss any limitations of the review processes used.                                                                                                                                                                                                                                | 15                              |
|                                                | 23d    | Discuss implications of the results for practice, policy, and future research.                                                                                                                                                                                                       | 15                              |
| <b>OTHER INFORMATION</b>                       |        |                                                                                                                                                                                                                                                                                      |                                 |
| Registration and protocol                      | 24a    | Provide registration information for the review, including register name and registration number, or state that the review was not registered.                                                                                                                                       | 2                               |
|                                                | 24b    | Indicate where the review protocol can be accessed, or state that a protocol was not prepared.                                                                                                                                                                                       | ×                               |
|                                                | 24c    | Describe and explain any amendments to information provided at registration or in the protocol.                                                                                                                                                                                      | ×                               |
| Support                                        | 25     | Describe sources of financial or non-financial support for the review, and the role of the funders or sponsors in the review.                                                                                                                                                        | 16                              |
| Competing interests                            | 26     | Declare any competing interests of review authors.                                                                                                                                                                                                                                   | 16                              |
| Availability of data, code and other materials | 27     | Report which of the following are publicly available and where they can be found: template data collection forms; data extracted from included studies; data used for all analyses; analytic code; any other materials used in the review.                                           | ×                               |

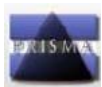

## PRISMA 2020 Checklist

- 1
- 2
- 3
- 4
- 5
- 6
- 7
- 8
- 9
- 10
- 11
- 12
- 13
- 14
- 15
- 16
- 17
- 18
- 19
- 20
- 21
- 22
- 23
- 24
- 25
- 26
- 27
- 28
- 29
- 30
- 31
- 32
- 33
- 34
- 35
- 36
- 37
- 38
- 39
- 40
- 41
- 42
- 43
- 44
- 45
- 46
- 47

10.1136/bmj.n71

For more information, visit: <http://www.prisma-statement.org/>

For peer review only

# BMJ Open

## The prevalence of autoimmune thyroid disease in patients with psoriasis: a meta-analysis

|                                 |                                                                                                                                                                                                                                                                                                                                                                                                                                                                                                                                                                                                                                                                                                                                          |
|---------------------------------|------------------------------------------------------------------------------------------------------------------------------------------------------------------------------------------------------------------------------------------------------------------------------------------------------------------------------------------------------------------------------------------------------------------------------------------------------------------------------------------------------------------------------------------------------------------------------------------------------------------------------------------------------------------------------------------------------------------------------------------|
| Journal:                        | <i>BMJ Open</i>                                                                                                                                                                                                                                                                                                                                                                                                                                                                                                                                                                                                                                                                                                                          |
| Manuscript ID                   | bmjopen-2021-055538.R2                                                                                                                                                                                                                                                                                                                                                                                                                                                                                                                                                                                                                                                                                                                   |
| Article Type:                   | Original research                                                                                                                                                                                                                                                                                                                                                                                                                                                                                                                                                                                                                                                                                                                        |
| Date Submitted by the Author:   | 09-Jan-2022                                                                                                                                                                                                                                                                                                                                                                                                                                                                                                                                                                                                                                                                                                                              |
| Complete List of Authors:       | Zhang, Xiaochao; The Second Xiangya Hospital of Central South University, Dermatology; Central South University<br>Zhang, Suhan; The Second Xiangya Hospital of Central South University, Dermatology; Central South University<br>Wu, Ruifang; The Second Xiangya Hospital of Central South University, Dermatology; Second Xiangya Hospital, Dermatology<br>Li, Siying; The Second Xiangya Hospital of Central South University, Dermatology; Second Xiangya Hospital, Dermatology<br>Su, Yuwen; The Second Xiangya Hospital of Central South University, Dermatology; Second Xiangya Hospital, Dermatology<br>Zhang, Peng; The Second Xiangya Hospital of Central South University, Dermatology; Second Xiangya Hospital, Dermatology |
| <b>Primary Subject Heading</b>: | Dermatology                                                                                                                                                                                                                                                                                                                                                                                                                                                                                                                                                                                                                                                                                                                              |
| Secondary Subject Heading:      | Dermatology, Immunology (including allergy)                                                                                                                                                                                                                                                                                                                                                                                                                                                                                                                                                                                                                                                                                              |
| Keywords:                       | Thyroid disease < DIABETES & ENDOCRINOLOGY, IMMUNOLOGY, Psoriasis < DERMATOLOGY                                                                                                                                                                                                                                                                                                                                                                                                                                                                                                                                                                                                                                                          |
|                                 |                                                                                                                                                                                                                                                                                                                                                                                                                                                                                                                                                                                                                                                                                                                                          |

SCHOLARONE™  
Manuscripts



I, the Submitting Author has the right to grant and does grant on behalf of all authors of the Work (as defined in the below author licence), an exclusive licence and/or a non-exclusive licence for contributions from authors who are: i) UK Crown employees; ii) where BMJ has agreed a CC-BY licence shall apply, and/or iii) in accordance with the terms applicable for US Federal Government officers or employees acting as part of their official duties; on a worldwide, perpetual, irrevocable, royalty-free basis to BMJ Publishing Group Ltd ("BMJ") its licensees and where the relevant Journal is co-owned by BMJ to the co-owners of the Journal, to publish the Work in this journal and any other BMJ products and to exploit all rights, as set out in our [licence](#).

The Submitting Author accepts and understands that any supply made under these terms is made by BMJ to the Submitting Author unless you are acting as an employee on behalf of your employer or a postgraduate student of an affiliated institution which is paying any applicable article publishing charge ("APC") for Open Access articles. Where the Submitting Author wishes to make the Work available on an Open Access basis (and intends to pay the relevant APC), the terms of reuse of such Open Access shall be governed by a Creative Commons licence – details of these licences and which [Creative Commons](#) licence will apply to this Work are set out in our licence referred to above.

Other than as permitted in any relevant BMJ Author's Self Archiving Policies, I confirm this Work has not been accepted for publication elsewhere, is not being considered for publication elsewhere and does not duplicate material already published. I confirm all authors consent to publication of this Work and authorise the granting of this licence.

1  
2  
3  
4  
5 The prevalence of autoimmune thyroid disease in patients with psoriasis: a  
6 meta-analysis  
7  
8  
9  
10

11  
12 Xiaochao Zhang<sup>1#</sup>, Suhan Zhang<sup>1#</sup>, Ruifang Wu<sup>1</sup>, Siying Li<sup>1</sup>, Yuwen Su<sup>1\*</sup>, Peng  
13 Zhang<sup>1\*</sup>  
14

15  
16  
17 1. Department of Dermatology, The Second Xiangya Hospital, Central South  
18 University  
19

20  
21 # Both two authors contributed equally to this work.  
22  
23

24  
25  
26 \* Correspondence to: Yuwen Su, Department of Dermatology, The Second Xiangya  
27 Hospital, Central South University, 139th Renmin Middle Road, Furong district,  
28 Changsha, Hunan, 410011, China  
29

30  
31 Phone: 086-13755116633 Email: [suyuwen1963@csu.edu.cn](mailto:suyuwen1963@csu.edu.cn)  
32

33  
34  
35 Peng Zhang, Department of Dermatology, The Second Xiangya Hospital, Central South  
36 University, 139<sup>th</sup> Renmin Middle Road, Furong district, Changsha, Hunan, 410011,  
37 China  
38  
39

40  
41 Phone: 086-15874291251 Email: [zhangpeng@csu.edu.cn](mailto:zhangpeng@csu.edu.cn)  
42

43  
44 Running title: A meta-analysis of AITD and psoriasis  
45  
46  
47  
48  
49  
50  
51  
52  
53  
54  
55  
56  
57  
58  
59  
60

## Abstract

**Objective** Psoriasis is a chronic inflammatory disease with autoimmune etiology. A possible link between psoriasis and autoimmune thyroid disease (AITD) has been suggested in some studies with inconsistent findings. This meta-analysis aims to determine the association between psoriasis and AITD.

**Design** A Meta-analysis of observational studies.

**Data sources** PubMed, EMBASE, Scopus, and the Cochrane Library were searched up to November 1st, 2021.

**Eligibility criteria for selecting studies** We included non-randomized studies, each with over 50 cases in every group, focusing on the rate of comorbidity between psoriasis and AITD.

**Data extraction and synthesis** Two independent reviewers screened the articles and extracted data. The restricted maximum-likelihood was applied to perform the meta-analysis. Odds ratio (OR) and 95% confidence intervals (CI) were pooled to compare the prevalence of AITD in psoriasis and control groups. Heterogeneity was assessed with  $I^2$  statistic. The Newcastle-Ottawa Scale (NOS) and Agency for Healthcare Research and Quality (AHRQ) were applied for quality assessment. The risk of bias was assessed with ROBINS-I.

**Results** Eleven available studies with data on 253,313 patients with psoriasis and 1,376,533 controls were included. Meta-analysis showed that patients with psoriasis had a higher prevalence of AITD (OR = 1.76, 95% CI: 1.35 - 2.28,  $Z = 4.25$ ,  $p < 0.01$ ), especially loss-of-function disorder of the thyroid gland. Both TgAb positive rate (OR = 1.98, 95% CI: 1.27 - 3.10,  $Z = 3.00$ ,  $p < 0.01$ ) and TPOAb positive rate (OR = 2.15, 95% CI: 1.31 - 3.52,  $Z = 3.05$ ,  $p < 0.01$ ) were also increased in the psoriasis group compared

1  
2  
3  
4  
5  
6  
7  
8  
9  
10  
11  
12  
13  
14  
15  
16  
17  
18  
19  
20  
21  
22  
23  
24  
25  
26  
27  
28  
29  
30  
31  
32  
33  
34  
35  
36  
37  
38  
39  
40  
41  
42  
43  
44  
45  
46  
47  
48  
49  
50  
51  
52  
53  
54  
55  
56  
57  
58  
59  
60

to the control group.

**Conclusions** Our study indicates that the rate of co-occurring AITD was significantly increased in patients with psoriasis. It suggests that the increased risk of AITD should be concerned in patients with psoriasis.

**PROSPERO registration number** CRD42020206005

Keywords: Psoriasis, Thyroid, Immunology

### **Strengths and limitations of this study**

This is the first meta-analysis focusing on the risk of AITD for psoriasis patients, which included hypothyroidism, hyperthyroidism, subclinical hypothyroidism, subclinical hyperthyroidism, Hashimoto's thyroiditis, Graves' disease, TgAb positivity and TPOAb positivity.

All studies included were of moderate to high quality and were representative. All studies were published in recent years.

The heterogeneity in the pooled data cannot be ignored, and was not improved by subgroup analysis. However, meta-regression analysis identified the differences of sample size and scope of research on AITD among these studies as the potential sources of heterogeneity.

## INTRODUCTION

Psoriasis is a chronic inflammatory disease with autoimmune etiology, affecting approximately 125 million people around the world.<sup>1</sup> The skin lesions of psoriasis occur mainly on the scalp, trunk, and exterior surfaces of the limbs, and manifest as erythema, plaques, and scales.<sup>2</sup> Apart from the impaired appearance and intense pruritus of the skin lesions, various comorbidities have a significant impact on the quality of life in patients with psoriasis.<sup>3 4</sup> Among the comorbidities, autoimmune thyroid disease (AITD) has been characterized in patients with psoriasis. For patients with psoriasis who also develop complications, their management requires extra attention.<sup>5</sup> Therefore, understanding the risk of other diseases on psoriasis has important clinical significance.

Autoimmune thyroid disease (AITD) is an inflammatory disease of the thyroid gland with the presence of thyroid autoantibodies, lymphocytic infiltration of thyroid parenchyma, and even thyroid dysfunction.<sup>6</sup> Graves' disease (GD) and Hashimoto's thyroiditis (HT) are the two main clinical subtypes of AITD. GD is characterized by hyperthyroidism and the presence of thyroid-stimulating hormone receptor antibodies (TRAb) in serum, while HT is characterized by hypothyroidism and the presence of thyroid peroxidase antibodies (TPOAb) or Thyroglobulin antibodies (TgAb) in serum.<sup>7</sup>

Psoriasis and AITD share some common pathophysiological features, such as Th1-predominant adaptive immune reaction.<sup>6</sup> Hence, the relationship between AITD and psoriasis has been hypothesized and studied. In 2006, Antonelli *et al.* first



1  
2  
3  
4 reported that the prevalence of AITD in patients with psoriatic arthritis was  
5  
6 significantly higher than in the general population.<sup>8</sup> However, the study reported by  
7  
8 Tsai *et al.*<sup>9</sup> pointed that the association between psoriasis and AITD was limited. In  
9  
10 recent years, several observational studies regarding the association between psoriasis  
11  
12 and AITD were published in succession, but the results of the studies were  
13  
14 inconsistent.<sup>10-16</sup> In addition, Karadag *et al.* reported that the commonly administered  
15  
16 acitretin treatment for psoriasis system treatment affects the levels of free T4 (thyroid  
17  
18 hormone).<sup>17</sup> To address this discrepancy, we designed and performed a meta-analysis  
19  
20 with the existing evidence to assess the relationship between psoriasis and AITD and  
21  
22 provide guidance on the clinical management of psoriasis.  
23  
24  
25  
26  
27  
28

## 29 30 **METHODS**

### 31 32 **Search strategy**

33  
34 The literature search was conducted through PubMed, EMBASE, Scopus, and  
35  
36 the Cochrane Library for relevant studies published before November 1st, 2021.  
37  
38 Detailed literature-search strategies of the databases are presented in Table 1.  
39  
40

### 41 42 **Inclusion and exclusion criteria**

43  
44 The inclusion criteria for the studies included in our analysis were the following:  
45  
46 (1) The prevalence of AITD in patients with psoriasis/psoriatic arthritis and  
47  
48 non-psoriasis were studied; (2) The study was a cohort study, case-control study, or  
49  
50 cross-sectional study; (3) The observed indicators were at least one of the following  
51  
52 outcomes: the prevalence of hypothyroidism, hyperthyroidism, HT, GD, or the  
53  
54 positive rate of TPOAb, TgAb, or TRAb; (4) The number of patients with psoriasis  
55  
56  
57  
58  
59  
60

1  
2  
3  
4 and the control group should be over 50. Drug-related studies, animal studies, reviews,  
5  
6 and conference abstracts were excluded from our analysis.  
7  
8

### 9 **Data extraction**

10  
11 The specific process for analyzing the studies generated from the search was as  
12  
13 follows: record screening and data extraction were performed by two independent  
14  
15 authors (X Zhang and S Zhang) according to the above retrieval strategy. When  
16  
17 disagreements could not be resolved through consensus by the two authors, these  
18  
19 were referred to the third author (R Wu) and resolved through discussion. The  
20  
21 following information in the included studies was extracted: the name of the first  
22  
23 author, year of publication, country of origin, study design, sample size, the definition  
24  
25 of psoriasis and AITD, gender ratio, and mean age.  
26  
27  
28  
29  
30  
31

### 32 **Quality assessment**

33  
34  
35 The Newcastle-Ottawa Scale (NOS)<sup>18</sup> was used to assess the quality of the  
36  
37 included cohort and case-control studies. The quality of the study was scored on three  
38  
39 dimensions: selection, comparability, and exposure/outcome. Studies that achieved  
40  
41 0-3, 4-6, 7-9 scores were considered of low, moderate and high quality respectively.  
42  
43 Additionally, the tools recommended by the Agency for Healthcare Research and  
44  
45 Quality (AHRQ)<sup>19</sup> were used for the cross-sectional studies. Eleven items were  
46  
47 included in AHRQ. The study was assigned one point if the answer “Yes”, otherwise  
48  
49 no points were assigned. Studies that achieved 0-3, 4-7, and 8-11 points were  
50  
51 considered of low, moderate and high quality respectively. Moreover, the ROBINS-I  
52  
53 was used to assess the risk of bias.<sup>20</sup> The assessments were carried by two authors (X  
54  
55  
56  
57  
58  
59  
60

Zhang and S Zhang), and checked by the third author(R Wu).

The meta-analysis was performed using Stata 16.0 software. We used odds ratios (OR) and 95% confidence intervals (CI) to describe the differences between patients with and without psoriasis. Differences were considered statistically significant when  $p < 0.05$ . The prediction interval was used to explore the prevalence of AITD in individuals with psoriasis. The  $I^2$  statistic was used to evaluate heterogeneity as follows:  $I^2 \leq 25\%$ , no heterogeneity;  $25\% \leq I^2 \leq 50\%$ , mild heterogeneity;  $50\% < I^2 \leq 75\%$ , moderate heterogeneity;  $I^2 > 75\%$ , severe heterogeneity. The random effects model was applied throughout the analyses. Publication bias was assessed by funnel plot and Egger's test (Publication bias was considered when  $p < 0.1$ ). Sensitivity analysis was performed to assess the stability of the meta-analysis by omitting one study in each turn. Univariate meta-regression analysis was used to investigate the sources of heterogeneity. The flow chart was drawn in Adobe Illustrator, and the forest plots, funnel plots, and Egger's test charts were drawn by Stata 16.0 software.

### **Patient and public involvement**

No patients or members of the public were involved in this review.

## **RESULTS**

### **Search results**

After removing duplicate results, we identified 6380 published studies in the initial search: 6377 studies were included by searching through databases and three studies were harvested by manually searching the references of relevant studies. After screening the titles and abstracts, the remaining 42 studies underwent further full-text

1  
2  
3  
4 screening. Eventually, 11 studies<sup>8-16 21 22</sup> that met the inclusion criteria were included  
5  
6  
7 in the final analysis (figure. 1).

### 8 9 **Study characteristics**

10  
11 The basic characteristics of the included studies are shown in Tables 2 and 3. A  
12  
13 total of 253,313 patients with psoriasis and 1,376,533 control patients were included  
14  
15 in the analysis. Two of the studies were cohort studies, eight were case-controlled  
16  
17 studies, and one was a cross-sectional study.  
18  
19  
20

### 21 22 **Quality of studies**

23  
24 Overall, five studies were of high quality and six of moderate ones (Table 3). In  
25  
26 the studies checked with NOS (n=10), five studies were considered of moderate  
27  
28 quality because the control groups were not from the same community. The only  
29  
30 cross-sectional study checked with AHRQ was a moderate quality study as the  
31  
32 method for control of confounding was not clear. Based on ROBINS-I, all included  
33  
34 studies had moderate risk in overall bias (Table 4).  
35  
36  
37  
38  
39

### 40 41 **Prevalence of AITD in patients with psoriasis**

42  
43 Eleven studies provided available data on the prevalence of AITD in patients  
44  
45 with psoriasis. The meta-analysis showed that patients with psoriasis had a higher  
46  
47 prevalence of AITD than the controls (OR = 1.76, 95% CI: 1.35 - 2.28, Z = 4.25, *p*  
48  
49 <0.01). The prediction interval ranged from 0.79 to 2.73, and the heterogeneity was  
50  
51 severe ( $I^2 = 92.72\%$ ).  
52  
53  
54

### 55 56 **Heterogeneity analysis**

57  
58 To investigate potential sources of heterogeneity, we firstly performed a  
59  
60

1  
2  
3  
4 subgroup analysis by types of study design. The high rate of comorbidity between  
5  
6 psoriasis and AITD was also observed in the cross-sectional study strata (OR = 2.12,  
7  
8 95% CI: 1.55 - 2.89), and in the case-control study strata (OR = 1.75, 95% CI: 1.23 -  
9  
10 2.48,  $Z = 3.14$ ,  $p < 0.01$ ) but with heterogeneity remaining severe (figure. 2), which  
11  
12 indicated that inconsistency of the study designs was not the source of high  
13  
14 heterogeneity.  
15  
16  
17  
18

19 We further conducted a meta-regression analysis to explore the reason for  
20  
21 between-study heterogeneity. Seven variables were included in the regression model,  
22  
23 covering average age, sex ratio, nation (China or other countries), race (Caucasian or  
24  
25 non-Caucasian), sample size, clinical types of psoriasis (psoriasis vulgaris or psoriatic  
26  
27 arthritis), and scope of research on AITD (all studies were divided into two categories:  
28  
29 one focusing on the loss-of-function disorder of the thyroid gland alone and the other  
30  
31 focusing on both the loss-of-function disorder and hyperfunction disorder of the  
32  
33 thyroid gland). When the statistical significance was set as  $p < 0.1$ , sample size ( $\beta =$   
34  
35  $-0.40$ ,  $S.E. = 0.20$ ,  $p = 0.07$ ) and scope of research on AITD ( $\beta = 0.45$ ,  $S.E. = 0.15$ ,  $p =$   
36  
37  $0.02$ ) were the potential sources of high heterogeneity.  
38  
39  
40  
41  
42  
43  
44

45 We removed three studies<sup>8 13 21</sup> outside the funnel plot and then conducted the  
46  
47 meta-analysis again. The results of the reanalysis also showed that patients with  
48  
49 psoriasis had a higher prevalence of AITD than the controls (OR = 1.34, CI: 1.20-1.50,  
50  
51  $Z = 5.07$ ,  $p < 0.01$ ), but with moderate heterogeneity ( $I^2 = 57.30\%$ ). The results  
52  
53 indicated that these three studies may have contributed to severe heterogeneity in the  
54  
55 previous analysis. The source of heterogeneity in the study of Antonelli *et al.* was that  
56  
57  
58  
59  
60

1  
2  
3  
4 all the patients were patients with psoriatic arthritis,<sup>8</sup> and the prevalence of AITD in  
5  
6 patients with psoriatic arthritis may be higher than that of patients with psoriasis.<sup>23</sup>  
7  
8  
9 The source of heterogeneity in the study by Peluso *et al.* may have been due to the  
10  
11 control group being comprised of hospital staff rather than the general population.<sup>21</sup>  
12  
13  
14 The source of heterogeneity in the study of Kiguradze *et al.* may lie in the fact that it  
15  
16 was a cross-sectional study.<sup>13</sup> These three studies were not excluded because they had  
17  
18 little effect on the final results of the analysis.  
19  
20  
21

### 22 **Sensitivity analysis and publication bias**

23  
24  
25 Omission of either of the included studies did not significantly change the  
26  
27 confidence interval of the combined effect (figure. 3A). Therefore, the results of the  
28  
29 analysis were considered reliable and stable. The funnel plot for the publication bias is  
30  
31 shown in figure. 3B. The results of Egger's test showed significant publication bias ( $p$   
32  
33 = 0.036, figure. 3C). There was a possibility of exaggerating the association between  
34  
35 psoriasis and AITD.  
36  
37  
38  
39

### 40 **Psoriasis and thyroid function status**

41  
42  
43 Patients with psoriasis had a higher prevalence of hypothyroidism than the  
44  
45 controls (OR = 1.21, 95% CI: 1.12 - 1.30,  $Z = 4.80$ ,  $p < 0.01$ ) and no significant  
46  
47 heterogeneity was observed ( $I^2 = 0.00\%$ ). Patients with psoriasis had a higher  
48  
49 prevalence of hyperthyroidism than the controls (OR = 1.20, 95% CI: 1.12 - 1.30,  
50  
51  $Z = 4.78$ ,  $p < 0.01$ ) and no significant heterogeneity was observed ( $I^2 = 0.00\%$ , figure.  
52  
53  
54  
55  
56 4A-B).

57  
58 Additionally, a higher prevalence of subclinical hypothyroidism and subclinical  
59  
60

1  
2  
3  
4 hyperthyroidism was observed in patients with psoriasis compared with the controls  
5  
6 (Subclinical hypothyroidism: OR = 2.24, 95% CI: 0.26 - 19.13, Z = 0.74,  $p = 0.46$ .  
7  
8 Subclinical hyperthyroidism: OR = 2.66, 95% CI: 0.70 - 10.07, Z = 1.44,  $p = 0.15$ ).  
9  
10  
11 However, the difference was not statistically significant (Supplementary figure. 1  
12  
13  
14 A-B).

### 15 16 17 **Psoriasis and specific autoimmune thyroid diseases**

18  
19 The prevalence of HT in patients with psoriasis and the controls was 0.215% and  
20  
21 0.199%, respectively. In comparison, the prevalence of GD in patients with psoriasis  
22  
23 and the controls was 0.443% and 0.405%, respectively. The prevalence of HT was  
24  
25 significantly higher in patients with psoriasis than the controls (OR = 1.88, 95% CI:  
26  
27 1.50 - 2.35, Z = 5.47,  $p < 0.01$ ) and the heterogeneity was moderate ( $I^2 = 55.98\%$ ). The  
28  
29 prevalence of GD was also higher in patients with psoriasis than the controls (OR =  
30  
31 1.02, 95% CI: 0.65 - 1.60, Z = 0.07,  $p = 0.94$ ) and the heterogeneity was severe ( $I^2 =$   
32  
33 92.78%). However, the difference was not statistically significant (figure. 4C, figure.  
34  
35 5A).  
36  
37  
38  
39  
40  
41  
42

### 43 **Psoriasis and thyroid serological antibodies**

44  
45 No studies provided data on the positive rate of TRAb in patients with psoriasis,  
46  
47 so we only included TgAb and TPOAb in the meta-analysis (figure. 5B-C). The  
48  
49 positive rate of TgAb was significantly higher in patients with psoriasis than the  
50  
51 controls (OR = 1.98, 95% CI: 1.27 - 3.10, Z = 3.00,  $p < 0.01$ ) and the heterogeneity  
52  
53 was mild ( $I^2 = 41.54\%$ ). The positive rate of TPOAb was significantly higher in  
54  
55 patients with psoriasis than the controls (OR = 2.15, 95% CI: 1.31 - 3.52, Z = 3.05,  $p$   
56  
57  
58  
59  
60

1  
2  
3  
4 <0.01) and the heterogeneity was moderate ( $I^2 = 56.27\%$ ).  
5

## 6 **DISCUSSION**

7  
8  
9 To our knowledge, this is the first meta-analysis focusing on the risk of AITD for  
10 psoriasis patients. The study by Khan *et al.* is the first meta-analysis of studies on the  
11 association between AITD and the incidence risk of psoriasis.<sup>24</sup> By summarizing all  
12 available evidence on the association between psoriasis and AITD, we found that the  
13 prevalence of AITD, particularly HT, was higher in patients with psoriasis than the  
14 control individuals. Additionally, elevated positive rates of TgAb and TPOAb were  
15 also observed in patients with psoriasis. As psoriasis is a type of discosmetic  
16 dermatosis and therefore likely to be of concern, patients with psoriasis are more  
17 likely to be active about seeing a doctor regarding their condition than patients with  
18 AITD. As such, we recommend that patients with psoriasis receive a thyroid-related  
19 examination when they have suspicious AITD-related symptoms. By promoting early  
20 diagnosis and treatment of AITD, patients may be able to avoid thyroid dysfunction.  
21  
22  
23  
24  
25  
26  
27  
28  
29  
30  
31  
32  
33  
34  
35  
36  
37  
38  
39

### 40 **Main findings**

41  
42 The primary finding of this meta-analysis is that the prevalence of AITD is  
43 increased in patients with psoriasis compared with the general population. However,  
44 severe heterogeneity was observed. In order to determine whether or not the  
45 inconsistency of the study designs was the primary source of heterogeneity, the  
46 subgroup analysis based on different study designs was conducted. However, the  
47 heterogeneity was not limited by subgroup analysis; hence the heterogeneity in this  
48 meta-analysis was not caused by inconsistency of the study design. Through further  
49  
50  
51  
52  
53  
54  
55  
56  
57  
58  
59  
60



1  
2  
3  
4 meta-regression analysis, we found that the differences in sample size and scope of  
5  
6 research on AITD among these studies might explain the high level of between-study  
7  
8 heterogeneity. Furthermore, the heterogeneity was improved when we focused on the  
9  
10 link of psoriasis with specific clinical characters of AITD, such as hypothyroidism,  
11  
12 hyperthyroidism, and the positivity rate of autoantibodies.  
13  
14  
15

16  
17 According to the definition of the study designs, an accurate cause-effect  
18  
19 relationship can only be demonstrated in cohort studies. The present study included  
20  
21 three types of study designs, including cohort, case-controlled, and cross-sectional  
22  
23 studies. Therefore, the results should be interpreted with caution. Additionally, it has  
24  
25 been demonstrated that the prevalence of HT in patients with psoriasis is elevated  
26  
27 compared with the controls. HT, a main clinical subtype of AITD, is generally  
28  
29 accompanied by hypothyroidism. An elevated frequency of hypothyroidism was also  
30  
31 observed in patients with psoriasis. Taken together, the current data indicates that  
32  
33 psoriasis may be closely associated with the loss-of-function disorder of the thyroid  
34  
35 gland.  
36  
37  
38  
39  
40  
41  
42

### 43 **Common pathogenesis of psoriasis and AITD**

44

45 Both abnormal immunological reactions and underlying genetic risk can  
46  
47 contribute to the pathogenesis of psoriasis and AITD.<sup>25 26</sup> These two diseases share  
48  
49 some autoimmune processes and susceptibility genes, which may explain the  
50  
51 concurrence of psoriasis and AITD. The predominant Th1 immune reaction has been  
52  
53 observed in patients with psoriasis,<sup>27 28</sup> such as Th1 infiltration in involved tissues,  
54  
55 and high serum levels of Th1-prototype chemokines and cytokines (TNF- $\alpha$ , IFN- $\gamma$ ,  
56  
57  
58  
59  
60

1  
2  
3  
4 and CXCL10), all of which are present in AITD.<sup>29-32</sup> Additionally, Th17-mediated  
5  
6 immune disorder has also been observed in psoriasis and AITD.<sup>33 34</sup> The two diseases  
7  
8 share several predisposing genetic alleles or regions. For example, the genetic data  
9  
10 from 265 families with two or more autoimmune disorders have shown that the  
11  
12 PTPN22-R620W allele has a remarkable association with HT and a mild association  
13  
14 with psoriasis.<sup>35</sup> Additionally, other SNP variations in the PTPN22 gene have been  
15  
16 demonstrated to be indicators for evaluating the risk of psoriasis.<sup>36 37</sup> IL12B has been  
17  
18 generally recognized as a psoriasis susceptibility gene,<sup>38</sup> an upstream variation of  
19  
20 which affects the phenotype of AITD in men.<sup>39</sup>  
21  
22  
23  
24  
25  
26  
27

### 28 **Implications for practice**

29  
30 As information relating to patient medications was not provided by in the  
31  
32 original research, drug exposure may be a source of residual confounding in the  
33  
34 present study and a potential risk factor for concurrence of psoriasis and AITD, apart  
35  
36 from the reasons mentioned above.  $\beta$ -blocker, used to control thyrotoxicosis-related  
37  
38 symptoms, has been implicated in induction or exacerbation of psoriasis.<sup>40 41</sup> In  
39  
40 addition, it has been reported that the administration of acitretin, a common drug for  
41  
42 the treatment of psoriasis, can lead to the reduction of free T4 (thyroid hormone)  
43  
44 levels in patients with psoriasis.<sup>17</sup> Therefore, once the patients develop suspicious  
45  
46 symptoms after these treatments, diagnostic investigation and intervention should be  
47  
48 considered as early as possible to avoid the exacerbation. On the other hand, the  
49  
50 treatment for AITD and psoriasis can be mutually beneficial. For example,  
51  
52 propylthiouracil (PTU), a drug used to inhibit thyroid hormone synthesis, has been  
53  
54  
55  
56  
57  
58  
59  
60

1  
2  
3  
4 effective in the treatment of psoriasis.<sup>42</sup> Based on the above findings, it is  
5  
6 recommended that the treatment options be adjusted once patients with psoriasis are  
7  
8 diagnosed with comorbid AITD.  
9  
10

### 11 **Limitations**

12  
13  
14 There are several limitations to this meta-analysis. First, the meta-analysis  
15  
16 included studies with different study designs. Given this, we conducted a subgroup  
17  
18 analysis of each study design, which also showed that the patients with psoriasis had  
19  
20 an increased prevalence of AITD in the cross-sectional study strata and the  
21  
22 case-control study strata. Second, there is considerable heterogeneity in the present  
23  
24 study. Subgroup analysis and meta-regression analysis helped us to identify the  
25  
26 potential sources of the heterogeneity. However, there are likely to be other unknown  
27  
28 reasons responsible for the heterogeneity. Thirdly, the lack of information on drug  
29  
30 application made drug exposure a confounding factor. Therefore, further large-scale  
31  
32 and high-quality prospective studies are still required to validate our findings.  
33  
34  
35  
36  
37  
38  
39

### 40 **CONCLUSIONS**

41  
42  
43 The present meta-analysis revealed that AITD was more prevalent in patients  
44  
45 with psoriasis than in the general population, especially loss-of-function disorder of  
46  
47 the thyroid gland. Moreover, patients with psoriasis were found to have elevated  
48  
49 positive rates of TPOAb and TgAb compared to the control individuals. Accordingly,  
50  
51 we recommend that every dermatologist be conscious of this association and suggest  
52  
53 necessary examinations and intervention be considered as soon as possible when  
54  
55 patients with psoriasis have suspicious AITD-related symptoms.  
56  
57  
58  
59  
60

1  
2  
3  
4 **Contributors** XZ and SZ carried out the extraction of reference data, meta-analysis,  
5  
6 and wrote manuscripts, RW and PZ supported and assisted the manuscripts, YS and  
7  
8 SL reviewed and suggested the manuscripts. All authors were involved in finalizing  
9  
10 the manuscript.  
11  
12

### 13 **Funding**

14  
15 This work was supported by grants from the National Natural Science Foundation of  
16  
17 China (No. 82173427 to Yuwen Su), The “Xiangya Outstanding Doctor” Bonus and  
18  
19 the Fundamental Research Funds for the Central Universities of Central South  
20  
21 University (No. 2019zzts905).  
22  
23  
24

25  
26 **Competing interests** None declared.  
27  
28

29  
30 **Patient consent for publication** Not required.  
31

32  
33 **Ethics approval** As this is a meta-analysis ethics approval was not required.  
34

35  
36 **Provenance and peer review** Not commissioned; externally peer reviewed.  
37

38  
39 **Data availability statement** All data relevant to the study are included in the article.  
40

41  
42 **Acknowledgments** Not required.  
43

### 44 **ORCID iD**

45  
46 Yuwen Su <https://orcid.org/0000-0001-9918-1830>  
47  
48  
49  
50  
51  
52  
53  
54  
55  
56  
57  
58  
59  
60

## Reference

1. Griffiths CEM, Van Der Walt JM, Ashcroft DM, *et al.* The global state of psoriasis disease epidemiology: a workshop report. *Br J Dermatol* 2017;177(1):e4-e7.
2. Langley RG, Krueger GG, Griffiths CE. Psoriasis: epidemiology, clinical features, and quality of life. *Ann Rheum Dis* 2005;64 Suppl 2:ii18-23; discussion ii24-5.
3. Dauden E, Castaneda S, Suarez C, *et al.* Clinical practice guideline for an integrated approach to comorbidity in patients with psoriasis. *J Eur Acad Dermatol Venereol* 2013;27(11):1387-404.
4. Schaefer CP, Cappelleri JC, Cheng R, *et al.* Health care resource use, productivity, and costs among patients with moderate to severe plaque psoriasis in the United States. *J Am Acad Dermatol* 2015;73(4):585-93.e3.
5. Kaushik SB, Lebwohl MG. Psoriasis: Which therapy for which patient: Psoriasis comorbidities and preferred systemic agents. *J Am Acad Dermatol* 2019;80(1):27-40.
6. Antonelli A, Ferrari SM, Corrado A, *et al.* Autoimmune thyroid disorders. *Autoimmun Rev* 2015;14(2):174-80.
7. Hesarghatta Shyamasunder A, Abraham P. Measuring TSH receptor antibody to influence treatment choices in Graves' disease. *Clin Endocrinol (Oxf)* 2017;86(5):652-57.
8. Antonelli A, Delle Sedie A, Fallahi P, *et al.* High prevalence of thyroid autoimmunity and hypothyroidism in patients with psoriatic arthritis. *J Rheumatol* 2006;33(10):2026-8.
9. Tsai TF, Wang TS, Hung ST, *et al.* Epidemiology and comorbidities of psoriasis patients in a national database in Taiwan. *J Dermatol Sci* 2011;63(1):40-6.
10. Alidrisi HA, Al Hamdi K, Mansour AA. Is There Any Association Between Psoriasis and Hashimoto's Thyroiditis? *Cureus* 2019;11(3):e4269.
11. Fallahi P, Ferrari SM, Ruffilli I, *et al.* Increased incidence of autoimmune thyroid disorders in patients with psoriatic arthritis: a longitudinal follow-up study. *Immunol Res* 2017;65(3):681-86.
12. Haddad A, Ashkenazi RI, Bitterman H, *et al.* Endocrine Comorbidities in Patients with Psoriatic Arthritis: A Population-based Case-controlled Study. *J Rheumatol* 2017;44(6):786-90.
13. Kiguradze T, Bruins FM, Guido N, *et al.* Evidence for the association of Hashimoto's thyroiditis with psoriasis: a cross-sectional retrospective study. *Int J Dermatol* 2017;56(5):553-56.
14. Valduga JaG, Rebeiko LB, Skare TL. Prevalence of Hashimoto's thyroiditis in psoriasis patients. *Rev Assoc Med Bras (1992)* 2021;67(1):52-57.
15. Vassilatou E, Papadavid E, Papastamatakis P, *et al.* No association of psoriasis with autoimmune thyroiditis. *J Eur Acad Dermatol Venereol* 2017;31(1):102-06.
16. Wang SH, Wang J, Lin YS, *et al.* Increased risk for incident thyroid diseases in people with psoriatic disease: A cohort study. *J Am Acad Dermatol* 2019;80(4):1006-12.
17. Karadag AS, Ozlu E, Kostek O, *et al.* Effect of low-dose acitretin treatment on pituitary hormones in psoriasis vulgaris: A retrospective study. *Indian J Dermatol Venereol Leprol* 2019;85(3):300-04.
18. Wells. G, Shea. B, O'connell. D, *et al.* The Newcastle-Ottawa Scale (NOS) for assessing the quality of nonrandomised studies in Newcastle-analyses. 11th November 2021 2019. [http://www.ohri.ca/programs/clinical\\_epidemiology/oxford.asp](http://www.ohri.ca/programs/clinical_epidemiology/oxford.asp).
19. Rostom. A, Dubé. C, Cranney. A, *et al.* AHRQ Evidence Reports. 11th November 2021 2004. <https://www.ncbi.nlm.nih.gov/books/NBK35156/>.
20. Sterne JA, Hernán MA, Reeves BC, *et al.* ROBINS-I: a tool for assessing risk of bias in

- 1  
2  
3 non-randomised studies of interventions. *BMJ (Clinical research ed)* 2016;355:i4919.
- 4  
5 21. Peluso R, Lupoli GA, Del Puente A, *et al.* Prevalence of thyroid autoimmunity in patients with  
6 spondyloarthropathies. *J Rheumatol* 2011;38(7):1371-7.
- 7  
8 22. Wu JJ, Nguyen TU, Poon KY, *et al.* The association of psoriasis with autoimmune diseases. *J Am*  
9 *Acad Dermatol* 2012;67(5):924-30.
- 10  
11 23. Vastarella M, Megna M, Lupoli GA, *et al.* Is there any association between psoriasis, psoriatic  
12 arthritis and thyroid autoimmunity? *Australas J Dermatol* 2020.
- 13  
14 24. Khan SR, Bano A, Wakkee M, *et al.* The association of autoimmune thyroid disease (AITD) with  
15 psoriatic disease: a prospective cohort study, systematic review and meta-analysis. *Eur J*  
16 *Endocrinol* 2017;177(4):347-59.
- 17  
18 25. Perera GK, Di Meglio P, Nestle FO. Psoriasis. *Annual review of pathology* 2012;7:385-422.
- 19  
20 26. Simmonds MJ. GWAS in autoimmune thyroid disease: redefining our understanding of  
21 pathogenesis. *Nature reviews Endocrinology* 2013;9(5):277-87.
- 22  
23 27. Cai Y, Fleming C, Yan J. New insights of T cells in the pathogenesis of psoriasis. *Cell Mol Immunol*  
24 2012;9(4):302-9.
- 25  
26 28. Lowes MA, Suarez-Farinas M, Krueger JG. Immunology of psoriasis. *Annu Rev Immunol*  
27 2014;32:227-55.
- 28  
29 29. Antonelli A, Ferrari SM, Giuggioli D, *et al.* Chemokine (C-X-C motif) ligand (CXCL)10 in autoimmune  
30 diseases. *Autoimmun Rev* 2014;13(3):272-80.
- 31  
32 30. Ruffilli I, Ragusa F, Benvenga S, *et al.* Psoriasis, Psoriatic Arthritis, and Thyroid Autoimmunity.  
33 *Front Endocrinol (Lausanne)* 2017;8:139.
- 34  
35 31. Nanba T, Watanabe M, Inoue N, *et al.* Increases of the Th1/Th2 cell ratio in severe Hashimoto's  
36 disease and in the proportion of Th17 cells in intractable Graves' disease. *Thyroid*  
37 2009;19(5):495-501.
- 38  
39 32. Peng S, Li C, Wang X, *et al.* Increased Toll-Like Receptors Activity and TLR Ligands in Patients with  
40 Autoimmune Thyroid Diseases. *Front Immunol* 2016;7:578.
- 41  
42 33. Hansel A, Gunther C, Ingwersen J, *et al.* Human slan (6-sulfo LacNAc) dendritic cells are  
43 inflammatory dermal dendritic cells in psoriasis and drive strong TH17/TH1 T-cell responses. *J*  
44 *Allergy Clin Immunol* 2011;127(3):787-94.e1-9.
- 45  
46 34. Vitales-Noyola M, Ramos-Levi AM, Martinez-Hernandez R, *et al.* Pathogenic Th17 and Th22 cells  
47 are increased in patients with autoimmune thyroid disorders. *Endocrine* 2017;57(3):409-17.
- 48  
49 35. Criswell LA, Pfeiffer KA, Lum RF, *et al.* Analysis of families in the multiple autoimmune disease  
50 genetics consortium (MADGC) collection: the PTPN22 620W allele associates with multiple  
51 autoimmune phenotypes. *Am J Hum Genet* 2005;76(4):561-71.
- 52  
53 36. Li Y, Liao W, Chang M, *et al.* Further genetic evidence for three psoriasis-risk genes: ADAM33,  
54 CDKAL1, and PTPN22. *J Invest Dermatol* 2009;129(3):629-34.
- 55  
56 37. Wang H, Wang Z, Rani PL, *et al.* Identification of PTPN22, ST6GAL1 and JAZF1 as psoriasis risk  
57 genes demonstrates shared pathogenesis between psoriasis and diabetes. *Exp Dermatol*  
58 2017;26(11):1112-17.
- 59  
60 38. Cargill M, Schrodi SJ, Chang M, *et al.* A large-scale genetic association study confirms IL12B and  
leads to the identification of IL23R as psoriasis-risk genes. *Am J Hum Genet* 2007;80(2):273-90.
39. Walsh JP, Berry J, Liu S, *et al.* The clinical presentation of autoimmune thyroid disease in men is  
associated with IL12B genotype. *Clin Endocrinol (Oxf)* 2011;74(4):508-12.
40. Balak DM, Hajdarbegovic E. Drug-induced psoriasis: clinical perspectives. *Psoriasis (Auckl)*

1  
2  
3 2017;7:87-94.

4 41. Mcdermott MT. Hyperthyroidism. *Annals of internal medicine* 2020;172(7):ITC49-ITC64.

5  
6 42. Gnanaraj P, Malligarjunan H, Dayalan H, *et al.* Therapeutic efficacy and safety of propylthiouracil  
7 in psoriasis: an open-label study. *Indian J Dermatol Venereol Leprol* 2011;77(6):673-6.  
8  
9

10  
11  
12 **Figure legend:**

13  
14 Figure 1 Flowchart for study screening

15  
16  
17 Figure 2 Forest plot of the association between psoriasis and autoimmune thyroid  
18 disease  
19

20  
21  
22 Figure 3 Sensitivity analysis and publication bias

23  
24  
25 Figure 4 A: Forest plots of psoriasis and hypothyroidism B: Forest plots of psoriasis  
26 and hyperthyroidism C: Forest plots of psoriasis and HT  
27

28  
29  
30 Figure 5 A: Forest plots of psoriasis and GD B: Forest plots of psoriasis and TgAb C:  
31 Forest plots of psoriasis and TPOAb  
32  
33  
34  
35  
36  
37  
38  
39  
40  
41  
42  
43  
44  
45  
46  
47  
48  
49  
50  
51  
52  
53  
54  
55  
56  
57  
58  
59  
60

| Database | Retrieval strategy                                                                                                                                                                                                                                                                                                                                                                                                                                                        |
|----------|---------------------------------------------------------------------------------------------------------------------------------------------------------------------------------------------------------------------------------------------------------------------------------------------------------------------------------------------------------------------------------------------------------------------------------------------------------------------------|
| PubMed   | ((((((((Thyroid[Title/Abstract]) OR (Thyroiditis[Title/Abstract])) OR (Hashimoto Thyroiditis[Title/Abstract])) OR (Graves Disease[Title/Abstract])) OR (Hyperthyroidism[Title/Abstract])) OR (Hypothyroidism[Title/Abstract])) OR (TgAb[Title/Abstract])) OR (TPOAb[Title/Abstract])) OR (TRAb[Title/Abstract])) OR (Endocrine Comorbidities[Title/Abstract])) OR (Autoimmune diseases[Title/Abstract])) AND ((psoriasis[Title/Abstract]) OR (psoriatic[Title/Abstract])) |
| Embase   | (thyroid:ab,ti OR thyroiditis:ab,ti OR 'hashimoto thyroiditis':ab,ti OR 'graves disease':ab,ti OR hyperthyroidism:ab,ti OR hypothyroidism:ab,ti OR tgab:ab,ti OR tpoab:ab,ti OR trab:ab,ti OR 'endocrine comorbidities':ab,ti OR 'autoimmune diseases':ab,ti) AND (psoriasis:ab,ti OR psoriatic:ab,ti)                                                                                                                                                                    |
| Scopus   | (( TITLE-ABS-KEY ( thyroiditis ) OR TITLE-ABS-KEY ( hashimoto AND thyroiditis ) OR TITLE-ABS-KEY ( graves AND disease ) OR TITLE-ABS-KEY ( hyperthyroidism ) OR TITLE-ABS-KEY ( hypothyroidism ) OR TITLE-ABS-KEY ( tgab ) OR TITLE-ABS-KEY ( tpoab ) OR TITLE-ABS-KEY ( trab ) )) AND ( TITLE-ABS-KEY ( psoriasis ) OR TITLE-ABS-KEY ( psoriatic ) )                                                                                                                     |
| Cochrane | (((Psoriasis) OR psoriatic) OR Pustulosis of Palms) AND (((((((Thyroid) OR Thyroiditis) OR Thyroiditides) OR Hashimoto Disease) OR Graves Disease) OR Hyperthyroidism) OR Hypothyroidism)). And chose literature published up to "2021/11/01". Then chose "Trials"                                                                                                                                                                                                        |

**Table 1** Database source and retrieval strategy.

TPOAb: Thyroid peroxidase antibody; TgAb: Thyroglobulin antibody; TRAb: Thyroid stimulating hormone receptor antibody.



| Study<br>(Author)        | Year | Country  | Study<br>design   | No.Patients | No.Controls | Patients,<br>%<br>Female | Patients,<br>%<br>mean age |
|--------------------------|------|----------|-------------------|-------------|-------------|--------------------------|----------------------------|
| Antonelli <i>et al.</i>  | 2006 | Italy    | Case-control<br>1 | 80          | 400         | 45                       | 57                         |
| Tsai <i>et al.</i>       | 2011 | China    | Case-control<br>1 | 51800       | 207200      | 38.5                     | 46.4                       |
| Peluso <i>et al.</i>     | 2011 | Italy    | Case-control<br>1 | 108         | 318         | 52.8                     | 39.9                       |
| Wu <i>et al.</i>         | 2012 | American | Case-control<br>1 | 25341       | 126705      | 48.4                     | 48.9                       |
| Vassilatou <i>et al.</i> | 2017 | Greece   | Case-control<br>1 | 114         | 286         | 49.1                     | 52.7                       |
| Kiguradze <i>et al.</i>  | 2017 | Greece   | Cross-sectional   | 9654        | 846961      | NA                       | NA                         |
| Haddad <i>et al.</i>     | 2017 | Israel   | Case-control<br>1 | 3161        | 31610       | 53.4                     | 58.4                       |
| Fallahi <i>et al.</i>    | 2017 | Italy    | Cohort            | 97          | 97          | 47.4                     | 56                         |
| Alidrisi <i>et al.</i>   | 2019 | Iraq     | Case-control<br>1 | 56          | 54          | 58.9                     | 43.05                      |
| Wang <i>et al.</i>       | 2019 | China    | Cohort            | 162842      | 162842      | 45.5                     | 45                         |
| Valduga <i>et al.</i>    | 2021 | Valduga  | Case-control<br>1 | 60          | 60          | 66.7                     | 54.5                       |

**Table 2** Characteristics of the included studies

| Study (Author)           | Definition of psoriasis                                                     | Definition of AITD                                                                                                               | NOS score |
|--------------------------|-----------------------------------------------------------------------------|----------------------------------------------------------------------------------------------------------------------------------|-----------|
| Antonelli <i>et al.</i>  | The criteria of Vasey and Espinoza                                          | Serum levels of thyroid stimulating hormone and TgAb and TPOAb                                                                   | 7         |
| Tsai <i>et al.</i>       | ICD-9-CM code 696.0                                                         | ICD-9-CM codes 242.9x, 244.9x                                                                                                    | 6         |
| Peluso <i>et al.</i>     | Classification of Psoriatic Arthritis study group criteria                  | Serum levels of TgAb > 115 IU/mL or TPOAb > 34 IU/mL, and Thyroid ultrasonography                                                | 7         |
| Wu <i>et al.</i>         | ICD-9-CM code 696.0                                                         | ICD-9-CM codes 242.0, 245.2                                                                                                      | 7         |
| Vassilatou <i>et al.</i> | Moll and Wright criteria                                                    | Serum levels of TgAb > 115 IU/mL or TPOAb > 34 IU/mL                                                                             | 7         |
| Kiguradze <i>et al.</i>  | ICD-9-CM code 696.0                                                         | ICD-9-CM codes 245.2                                                                                                             | 6*        |
| Haddad <i>et al.</i>     | Clinical diagnosis from Clalit Health Services                              | Clinical diagnosis from Clalit Health Services                                                                                   | 6         |
| Fallahi <i>et al.</i>    | Criteria of Vasey and Espinoza                                              | Serum levels of TgAb or TPOAb > 100 IU/mL                                                                                        | 6         |
| Alidrisi <i>et al.</i>   | Clinical diagnosis from Endocrine and Metabolism Center                     | Serum levels of TgAb > 115 IU/mL or TPOAb > 34 IU/mL                                                                             | 6         |
| Wang <i>et al.</i>       | ICD-9-CM code 696.0                                                         | ICD-9-CM code 242, 242.0, 244, 246                                                                                               | 8         |
| Valduga <i>et al.</i>    | Clinical diagnosis and measured by Psoriasis Area and Severity Index (PASI) | Hypothyroidism was detected, or when they need for thyroid hormone replacement therapy or positive of TPOAb with or without TgAb | 6         |

**Table 3** Characteristics of the included studies (2)

\*This was a score based on the AHRQ evaluation.

1  
2  
3  
4  
5  
6  
7  
8  
9  
10  
11  
12  
13  
14  
15  
16  
17  
18  
19  
20  
21  
22  
23  
24  
25  
26  
27  
28  
29  
30  
31  
32  
33  
34  
35  
36  
37  
38  
39  
40  
41  
42  
43  
44  
45  
46

ICD-9-CM: The International Classification of Diseases, Ninth Revision, Clinical Modification

For peer review only

1  
2  
3  
4  
5  
6  
7  
8  
9  
10  
11  
12  
13  
14  
15  
16  
17  
18  
19  
20  
21  
22  
23  
24  
25  
26  
27  
28  
29  
30  
31  
32  
33  
34  
35  
36  
37  
38  
39  
40  
41  
42  
43  
44  
45  
46

| Study(Author)            | Year | Bias due to confounding | Bias in selection of participants into the study | Bias in classification of interventions | Bias due to deviations from intended interventions | Bias due to missing data | Bias in measurement of outcomes | Bias in selection of the reported result | Overall bias  |
|--------------------------|------|-------------------------|--------------------------------------------------|-----------------------------------------|----------------------------------------------------|--------------------------|---------------------------------|------------------------------------------|---------------|
| Antonelli <i>et al.</i>  | 2006 | Moderate risk           | Low risk                                         | Low risk                                | Moderate risk                                      | Low risk                 | Low risk                        | Low risk                                 | Moderate risk |
| Tsai <i>et al.</i>       | 2011 | Moderate risk           | Low risk                                         | Low risk                                | Moderate risk                                      | Low risk                 | Low risk                        | Low risk                                 | Moderate risk |
| Peluso <i>et al.</i>     | 2011 | Moderate risk           | Low risk                                         | Low risk                                | Moderate risk                                      | Low risk                 | Low risk                        | Low risk                                 | Moderate risk |
| Wu <i>et al.</i>         | 2012 | Moderate risk           | Low risk                                         | Low risk                                | Moderate risk                                      | Low risk                 | Low risk                        | Moderate risk                            | Moderate risk |
| Vassilatou <i>et al.</i> | 2017 | Moderate risk           | Low risk                                         | Low risk                                | Low risk                                           | Low risk                 | Low risk                        | Low risk                                 | Moderate risk |
| Kiguradze <i>et al.</i>  | 2017 | Moderate risk           | Low risk                                         | Low risk                                | Moderate risk                                      | Low risk                 | Low risk                        | Moderate risk                            | Moderate risk |
| Haddad <i>et al.</i>     | 2017 | Moderate risk           | Low risk                                         | Low risk                                | Moderate risk                                      | Low risk                 | Low risk                        | Low risk                                 | Moderate risk |
| Fallahi <i>et al.</i>    | 2017 | Moderate risk           | Low risk                                         | Low risk                                | Moderate risk                                      | Low risk                 | Low risk                        | Low risk                                 | Moderate risk |
| Alidrisi <i>et al.</i>   | 2019 | Moderate risk           | Low risk                                         | Low risk                                | Moderate risk                                      | Low risk                 | Low risk                        | Low risk                                 | Moderate risk |
| Wang <i>et al.</i>       | 2019 | Moderate risk           | Low risk                                         | Low risk                                | Moderate risk                                      | Low risk                 | Low risk                        | Low risk                                 | Moderate risk |
| Valduga <i>et al.</i>    | 2021 | Moderate risk           | Low risk                                         | Low risk                                | Moderate risk                                      | Low risk                 | Low risk                        | Moderate risk                            | Moderate risk |

**Table 4** Risk of bias for the 11 included studies based on the ROBINS-I tool

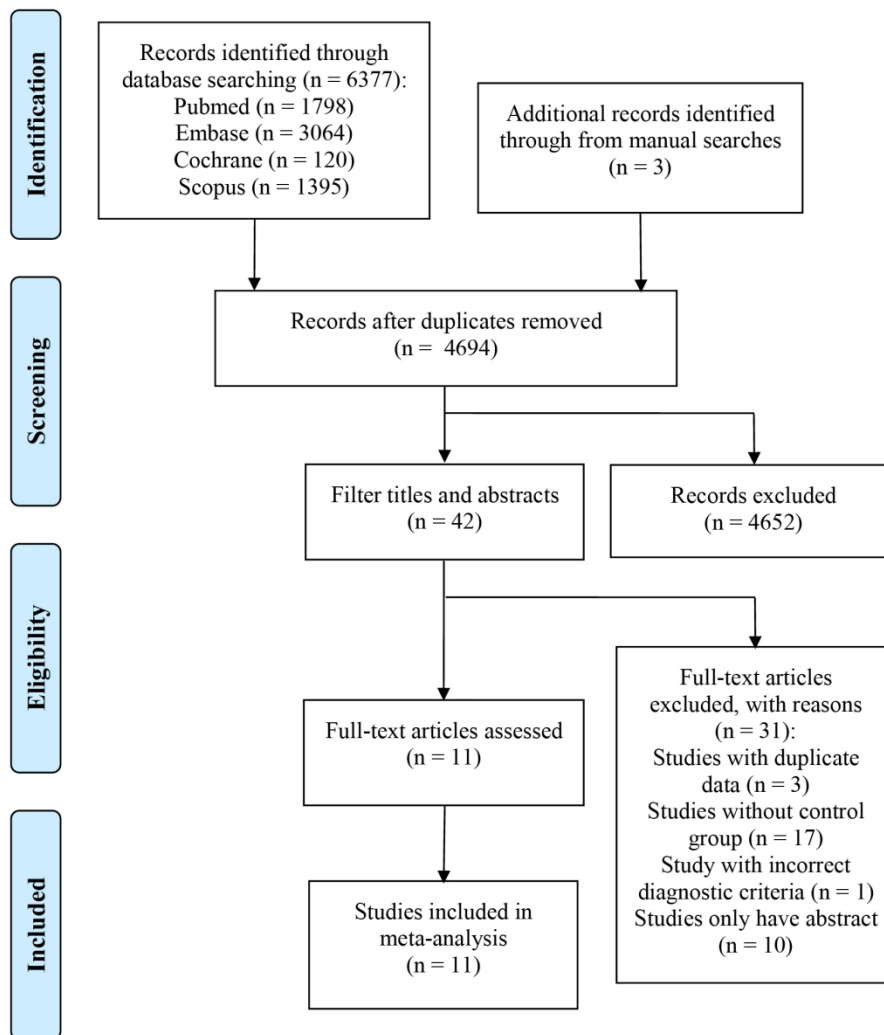

Figure 1 Flowchart for study screening

164x200mm (300 x 300 DPI)



Figure 2 Forest plot of the association between psoriasis and autoimmune thyroid disease

215x206mm (300 x 300 DPI)



Figure 3 Sensitivity analysis and publication bias

141x138mm (300 x 300 DPI)



Figure 4 A: Forest plots of psoriasis and hypothyroidism B: Forest plots of psoriasis and hyperthyroidism C: Forest plots of psoriasis and HT

117x162mm (300 x 300 DPI)





Random-effects REML model



Random-effects REML model



Random-effects REML model

Figure 5 A: Forest plots of psoriasis and GD B: Forest plots of psoriasis and TgAb C: Forest plots of psoriasis and TPOAb

123x169mm (300 x 300 DPI)



Random-effects REML model



Random-effects REML model

117x97mm (300 x 300 DPI)



## PRISMA 2020 Checklist

| Section and Topic             | Item # | Checklist item                                                                                                                                                                                                                                                                                       | Location where item is reported |
|-------------------------------|--------|------------------------------------------------------------------------------------------------------------------------------------------------------------------------------------------------------------------------------------------------------------------------------------------------------|---------------------------------|
| <b>TITLE</b>                  |        |                                                                                                                                                                                                                                                                                                      |                                 |
| Title                         | 1      | Identify the report as a meta-analysis.                                                                                                                                                                                                                                                              | 1                               |
| <b>ABSTRACT</b>               |        |                                                                                                                                                                                                                                                                                                      |                                 |
| Abstract                      | 2      | The abstract included Objective, Design, Data sources, Eligibility criteria for selecting studies, Data extraction and synthesis, Results, Conclusions, PROSPERO registration number .                                                                                                               | 2                               |
| <b>INTRODUCTION</b>           |        |                                                                                                                                                                                                                                                                                                      |                                 |
| Rationale                     | 3      | Describe the rationale for the review in the context of existing knowledge.                                                                                                                                                                                                                          | 4                               |
| Objectives                    | 4      | Provide an explicit statement of the objective the review addresses.                                                                                                                                                                                                                                 | 5                               |
| <b>METHODS</b>                |        |                                                                                                                                                                                                                                                                                                      |                                 |
| Eligibility criteria          | 5      | Specify the inclusion and exclusion criteria for the review and how studies were grouped for the syntheses.                                                                                                                                                                                          | 5                               |
| Information sources           | 6      | Specify all databases, registers, websites, organisations, reference lists and other sources searched or consulted to identify studies. Specify the date when each source was last searched or consulted.                                                                                            | 5, Table 1                      |
| Search strategy               | 7      | Present the full search strategies for all databases, registers and websites, including any filters and limits used.                                                                                                                                                                                 | Table 1                         |
| Selection process             | 8      | Specify the methods used to decide whether a study met the inclusion criteria of the review, including how many reviewers screened each record and each report retrieved, whether they worked independently, and if applicable, details of automation tools used in the process.                     | 6                               |
| Data collection process       | 9      | Specify the methods used to collect data from reports, including how many reviewers collected data from each report, whether they worked independently, any processes for obtaining or confirming data from study investigators, and if applicable, details of automation tools used in the process. | 6                               |
| Data items                    | 10a    | List and define all outcomes for which data were sought. Specify whether all results that were compatible with each outcome domain in each study were sought (e.g. for all measures, time points, analyses), and if not, the methods used to decide which results to collect.                        | 6                               |
|                               | 10b    | List and define all other variables for which data were sought (e.g. participant and intervention characteristics, funding sources). Describe any assumptions made about any missing or unclear information.                                                                                         | 6                               |
| Study risk of bias assessment | 11     | Specify the methods used to assess risk of bias in the included studies, including details of the tool(s) used, how many reviewers assessed each study and whether they worked independently, and if applicable, details of automation tools used in the process.                                    | 6                               |
| Effect measures               | 12     | Specify for each outcome the effect measure(s) (e.g. risk ratio, mean difference) used in the synthesis or presentation of results.                                                                                                                                                                  | 7                               |
| Synthesis methods             | 13a    | Describe the processes used to decide which studies were eligible for each synthesis (e.g. tabulating the study intervention characteristics and comparing against the planned groups for each synthesis (item #5)).                                                                                 | 7, Figure 1                     |
|                               | 13b    | Describe any methods required to prepare the data for presentation or synthesis, such as handling of missing summary statistics, or data conversions.                                                                                                                                                | 6                               |
|                               | 13c    | Describe any methods used to tabulate or visually display results of individual studies and syntheses.                                                                                                                                                                                               | 7                               |
|                               | 13d    | Describe any methods used to synthesize results and provide a rationale for the choice(s). If meta-analysis was performed, describe the model(s), method(s) to identify the presence and extent of statistical heterogeneity, and software package(s) used.                                          | 6                               |
|                               | 13e    | Describe any methods used to explore possible causes of heterogeneity among study results (e.g. subgroup analysis, meta-regression).                                                                                                                                                                 | 7, 8                            |
|                               | 13f    | Describe any sensitivity analyses conducted to assess robustness of the synthesized results.                                                                                                                                                                                                         | 7                               |
| Reporting bias assessment     | 14     | Describe any methods used to assess risk of bias due to missing results in a synthesis (arising from reporting biases).                                                                                                                                                                              | 6                               |
| Certainty                     | 15     | Describe any methods used to assess certainty (or confidence) in the body of evidence for an outcome.                                                                                                                                                                                                | 6                               |

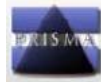

## PRISMA 2020 Checklist

| Section and Topic                              | Item # | Checklist item                                                                                                                                                                                                                                                                       | Location where item is reported |
|------------------------------------------------|--------|--------------------------------------------------------------------------------------------------------------------------------------------------------------------------------------------------------------------------------------------------------------------------------------|---------------------------------|
| assessment                                     |        |                                                                                                                                                                                                                                                                                      |                                 |
| <b>RESULTS</b>                                 |        |                                                                                                                                                                                                                                                                                      |                                 |
| Study selection                                | 16a    | Describe the results of the search and selection process, from the number of records identified in the search to the number of studies included in the review, ideally using a flow diagram.                                                                                         | Figure 1                        |
|                                                | 16b    | Cite studies that might appear to meet the inclusion criteria, but which were excluded, and explain why they were excluded.                                                                                                                                                          | Figure 1                        |
| Study characteristics                          | 17     | Cite each included study and present its characteristics.                                                                                                                                                                                                                            | Table 2                         |
| Risk of bias in studies                        | 18     | Present assessments of risk of bias for each included study.                                                                                                                                                                                                                         | Table 4                         |
| Results of individual studies                  | 19     | For all outcomes, present, for each study: (a) summary statistics for each group (where appropriate) and (b) an effect estimate and its precision (e.g. confidence/credible interval), ideally using structured tables or plots.                                                     | Figure 2-5                      |
| Results of syntheses                           | 20a    | For each synthesis, briefly summarise the characteristics and risk of bias among contributing studies.                                                                                                                                                                               | 8                               |
|                                                | 20b    | Present results of all statistical syntheses conducted. If meta-analysis was done, present for each the summary estimate and its precision (e.g. confidence/credible interval) and measures of statistical heterogeneity. If comparing groups, describe the direction of the effect. | 8,10,11                         |
|                                                | 20c    | Present results of all investigations of possible causes of heterogeneity among study results.                                                                                                                                                                                       | 8-9                             |
|                                                | 20d    | Present results of all sensitivity analyses conducted to assess the robustness of the synthesized results.                                                                                                                                                                           | Figure 3                        |
| Reporting biases                               | 21     | Present assessments of risk of bias due to missing results (arising from reporting biases) for each synthesis assessed.                                                                                                                                                              | Figure 3                        |
| Certainty of evidence                          | 22     | Present assessments of certainty (or confidence) in the body of evidence for each outcome assessed.                                                                                                                                                                                  | Figure 2                        |
| <b>DISCUSSION</b>                              |        |                                                                                                                                                                                                                                                                                      |                                 |
| Discussion                                     | 23a    | Provide a general interpretation of the results in the context of other evidence.                                                                                                                                                                                                    | 13,14                           |
|                                                | 23b    | Discuss any limitations of the evidence included in the review.                                                                                                                                                                                                                      | 15                              |
|                                                | 23c    | Discuss any limitations of the review processes used.                                                                                                                                                                                                                                | 15                              |
|                                                | 23d    | Discuss implications of the results for practice, policy, and future research.                                                                                                                                                                                                       | 15                              |
| <b>OTHER INFORMATION</b>                       |        |                                                                                                                                                                                                                                                                                      |                                 |
| Registration and protocol                      | 24a    | Provide registration information for the review, including register name and registration number, or state that the review was not registered.                                                                                                                                       | 2                               |
|                                                | 24b    | Indicate where the review protocol can be accessed, or state that a protocol was not prepared.                                                                                                                                                                                       | ×                               |
|                                                | 24c    | Describe and explain any amendments to information provided at registration or in the protocol.                                                                                                                                                                                      | ×                               |
| Support                                        | 25     | Describe sources of financial or non-financial support for the review, and the role of the funders or sponsors in the review.                                                                                                                                                        | 16                              |
| Competing interests                            | 26     | Declare any competing interests of review authors.                                                                                                                                                                                                                                   | 16                              |
| Availability of data, code and other materials | 27     | Report which of the following are publicly available and where they can be found: template data collection forms; data extracted from included studies; data used for all analyses; analytic code; any other materials used in the review.                                           | ×                               |



## PRISMA 2020 Checklist

- 1
- 2
- 3
- 4
- 5
- 6
- 7
- 8
- 9
- 10
- 11
- 12
- 13
- 14
- 15
- 16
- 17
- 18
- 19
- 20
- 21
- 22
- 23
- 24
- 25
- 26
- 27
- 28
- 29
- 30
- 31
- 32
- 33
- 34
- 35
- 36
- 37
- 38
- 39
- 40
- 41
- 42
- 43
- 44
- 45
- 46
- 47

10.1136/bmj.n71

For more information, visit: <http://www.prisma-statement.org/>

For peer review only
