# Supplementary figures and images for: Prevalence of autoimmune thyroid disease in patients with psoriasis: a meta-analysis
Source: PubMed Central journal article supplement — BMJ Open. 2022 Jan 25;12(1):e055538. doi: 10.1136/bmjopen-2021-055538 (PMC8804708; doi:10.1136/bmjopen-2021-055538), 2022-01-25

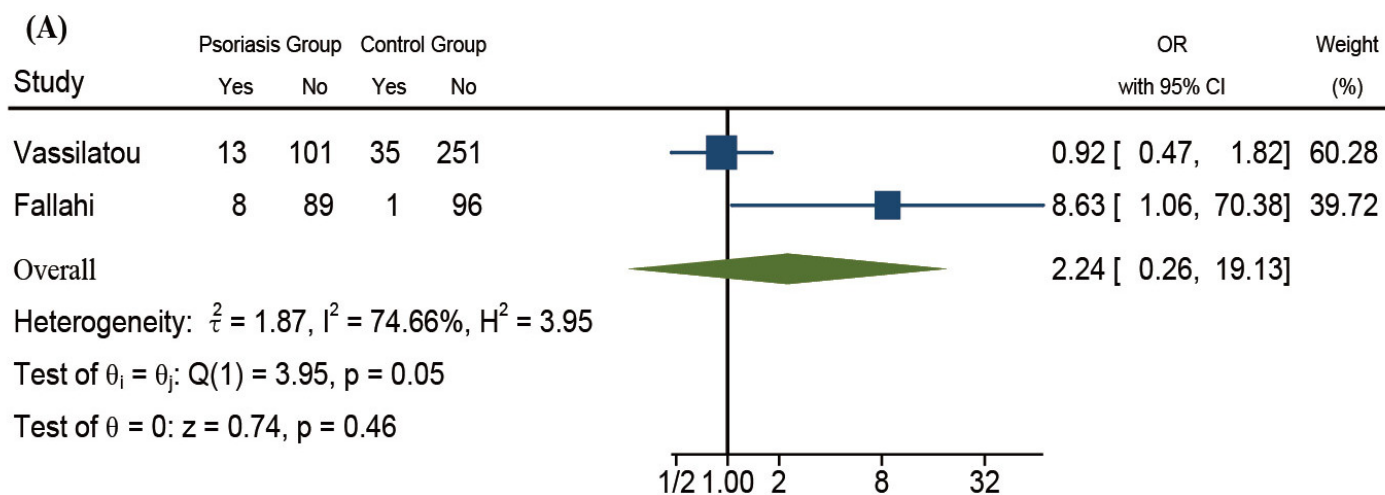

Random-effects REML model

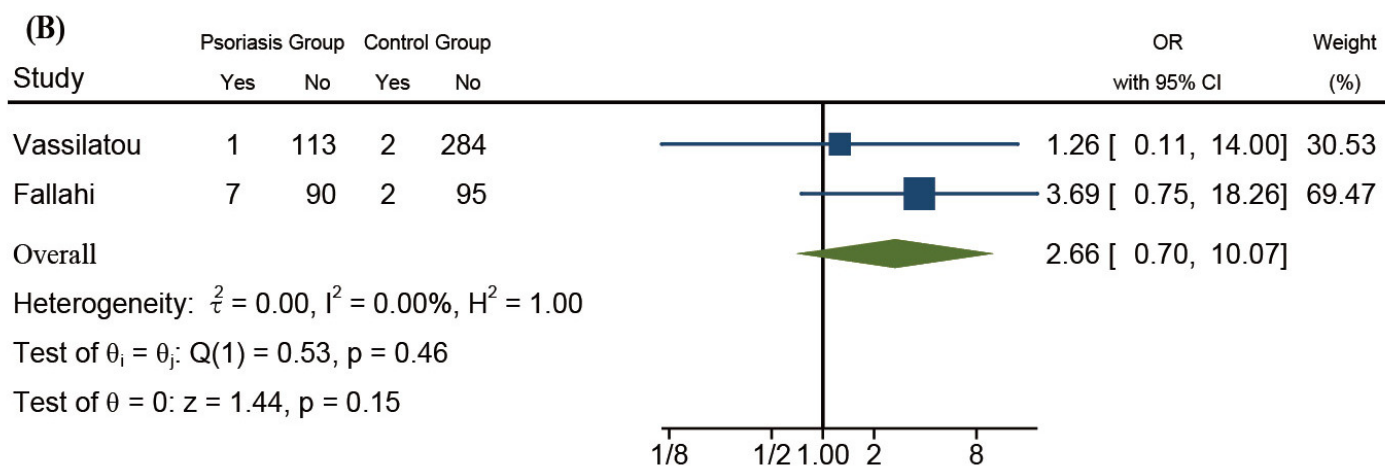

Random-effects REML model

Supplement: bmjopen-2021-055538supp001.pdf [file bmjopen-2021-055538supp001.pdf]
